# Supplementary material for: Ru-catalysed C(sp2)–H vinylation/annulation of benzoic acids and alkynes: rapid access to medium-sized lactones
Source: Royal Society of Chemistry journal article supplement (doi:10.1039/d0cc07573f), 2020-12-21

## Supporting Information for

# **Ru-catalysed C(sp<sup>2</sup>)-H vinylation/annulation of benzoic acids and alkynes: rapid access to medium-sized lactones**

**Xiao-Qiang Hu,<sup>\*a</sup> Zi-Kui Liu,<sup>a</sup> Ye-Xing Hou,<sup>a</sup> Guodong Zhang<sup>\*b</sup> and Yang Gao<sup>\*c</sup>**

<sup>a</sup>Key Laboratory of Catalysis and Energy Materials Chemistry of Ministry of Education & Hubei Key Laboratory of Catalysis and Materials Science, School of Chemistry and Materials Science, South-Central University for Nationalities, Wuhan 430074, China.

E-mail: [huxiaoqiang@mail.scuec.edu.cn](mailto:huxiaoqiang@mail.scuec.edu.cn).

<sup>b</sup>Yangzhou University College of Chemistry and Chemical Engineering, Siwangting Road 180 Yangzhou, 225002 China.

E-mail: [guodong.zhang@yzu.edu.cn](mailto:guodong.zhang@yzu.edu.cn).

<sup>c</sup>School of Chemical Engineering and Light Industry, Guangdong University of Technology, Guangzhou, 510006, China.

**[huxiaoqiang@mail.scuec.edu.cn](mailto:huxiaoqiang@mail.scuec.edu.cn)**

## Table of Contents

|                                                                                                                       |    |
|-----------------------------------------------------------------------------------------------------------------------|----|
| 1. General Information .....                                                                                          | 3  |
| 2. Preparation of Substrates .....                                                                                    | 3  |
| 3. General Procedure and Spectral Data of the Products .....                                                          | 4  |
| 3.1 General procedure for the synthesis of <b>3aa-sa</b> , <b>3ab-ag</b> , <b>3ah</b> , <b>3dh</b> , <b>3di</b> ..... | 4  |
| 3.2 Spectral data of the products <b>3aa-sa</b> , <b>3ab-ag</b> , <b>3ah</b> , <b>3dh</b> , <b>3di</b> .....          | 4  |
| 4. Mechanistic studies.....                                                                                           | 12 |
| 5. X-Ray structure of <b>3aa</b> .....                                                                                | 14 |
| 6. NMR Spectra of products <b>3aa-sa</b> , <b>3ab-ag</b> , <b>3ah</b> , <b>3dh</b> , <b>3di</b> and <b>2f</b> .....   | 15 |

## 1. General Information

Unless otherwise noted, materials were purchased from commercial suppliers and used without further purification. The solvents used were purified by distillation over the drying agents. All reactions were monitored by thin-layer chromatography (TLC) on silica gel plates using UV light as visualizing agent (if applicable). Flash column chromatography was performed using 200-300 mesh silica gel.  $^1\text{H}$  NMR spectra were recorded on 400/600 MHz spectrophotometers. Chemical shifts are reported in delta ( $\delta$  (ppm)) units in parts per million (ppm) relative to the singlet (0 ppm) for tetramethylsilane (TMS). Data are reported as follows: chemical shift, multiplicity (s = singlet, d = doublet, t = triplet, q = quartet, dd = doublet of doublets, m = multiplet), coupling constants (Hz) and integration.  $^{13}\text{C}$  NMR spectra were recorded on Varian Mercury 400 (100 MHz) with complete proton decoupling spectrophotometers ( $\text{CDCl}_3$ : 77.0 ppm).

## 2. Preparation of Substrates

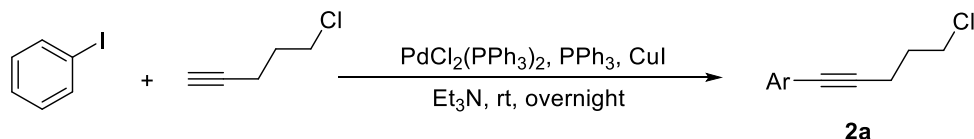

$\text{CuI}$  (18 mg, 1 mol%),  $\text{PdCl}_2(\text{PPh}_3)_2$  (36 mg, 5 mol%) and  $\text{PPh}_3$  (18 mg, 7 mol%) were added into a 100 mL flask. Then  $\text{Et}_3\text{N}$  (50 mL), iodobenzene (2.0 g, 10 mmol) and 5-chloro-1-pentyne (1.0 g, 10 mmol) was added into the flask. The resultant mixture was stirred at room temperature until the reaction was completed, as monitored by TLC. Then,  $\text{H}_2\text{O}$  (20 mL) was added and the resulting mixture was extracted with  $\text{EtOAc}$  ( $3 \times 20$  mL). The combined organic layers were washed with brine (20 mL), dried over  $\text{NaSO}_4$ , filtered, and the volatiles were removed under reduced pressure. The residue was purified by column chromatography to give the compound **2a** in 82% yield as a yellow oil. Other alkynes (**2b-2g**) were prepared according to the above procedure. The alkynes (**2b-2e**, **2g**) are known compounds.

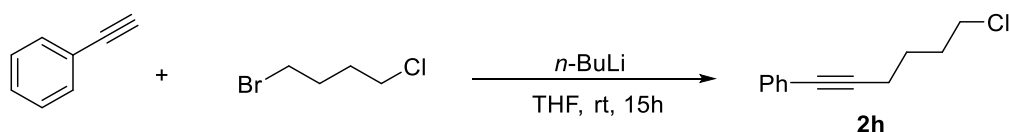

To a round-bottom flask were added Phenylacetylene (1.0 g, 10 mmol), 1-Bromo-4-chlorobutane (2.4 g, 14 mmol) and THF (40 mL). The solution was cooled to  $-78^\circ\text{C}$ ,  $n\text{-BuLi}$  (4.8 mL, 12 mmol) was slowly

added into the reaction mixture. The mixture was heated 80 °C (reflux) for 15 hours. Then, H<sub>2</sub>O (20 mL) was added and the resulting mixture was extracted with EtOAc (3×20 mL). The combined organic layers were washed with brine (20 mL), dried over NaSO<sub>4</sub>, filtered, and the volatiles were removed under reduced pressure. The residue was purified by column chromatography to give the compound **2h** in 65% yield as a yellow oil.

### 3. General Procedure and Spectral Data of the Products

#### 3.1 General procedure for the synthesis of **3aa-sa**, **3ab-3ag**, **3dh**, **3di**

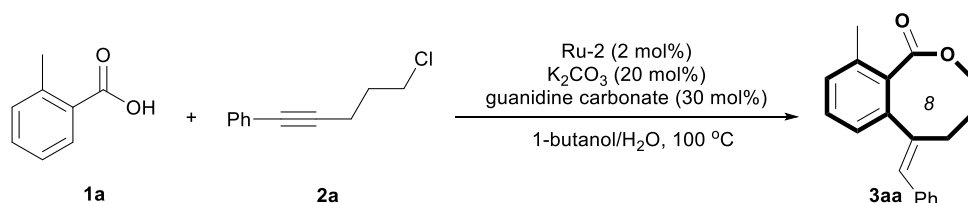

**1a** (68.0 mg, 0.5 mmol), **2a** (133.6 mg, 0.75 mmol), [RuI<sub>2</sub>(*p*-cymene)]<sub>2</sub> (2 mol%), K<sub>2</sub>CO<sub>3</sub> (13.7 mg, 0.1 mmol) and guanidine carbonate (27.0 mg, 0.15 mmol) were dissolved in 1-butanol/H<sub>2</sub>O (1.0 mL, 9/1). Then, the mixture was stirred at 100 °C for 16 h, as monitored by TLC analysis. The crude product was purified by flash chromatography on silica gel (petroleum ether/ethyl acetate = 4:1) directly to give the desired product **3aa** in 78% isolated yield as a white solid. Other products **3aa-sa**, **3ab-ag**, **3ah**, **3dh**, **3di** were prepared according to the above procedure.

#### 3.2 Spectral data of the products **3aa-sa**, **3ab-ag**, **3ah**, **3dh**, **3di**

##### Product **3aa**

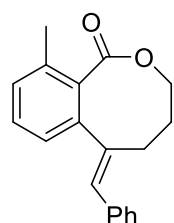

Yield of **3aa**: 108.5 mg, 78% as a yellow solid. <sup>1</sup>H NMR (250 MHz, CDCl<sub>3</sub>) δ (ppm) = 7.31 – 7.26 (m, 1H), 7.25 – 7.18 (m, 4H), 7.17 – 7.08 (m, 2H), 7.01 (d, *J* = 3.8 Hz, 1H), 6.41 (s, 1H), 4.18 (t, *J* = 5.0 Hz, 2H), 2.52 (t, *J* = 6.6 Hz, 2H), 2.33 (s, 3H), 2.04 – 1.94 (m, 2H). <sup>13</sup>C NMR (63 MHz, CDCl<sub>3</sub>) δ (ppm) = 170.9, 143.8, 140.3, 136.9, 136.2, 130.7, 130.5, 129.8, 129.5, 128.6, 128.8, 127.1, 125.3, 68.4, 30.2, 29.2, 19.9. M.P.: 118.0 – 118.5 °C. HRMS (ESI): *m/z* [M + H]<sup>+</sup> calcd for C<sub>19</sub>H<sub>18</sub>O<sub>2</sub>: 279.1380; found: 279.1378.

### Product 3ba

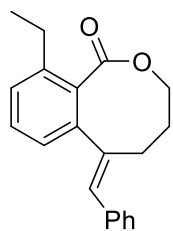

Yield of **3ba**: 124.2 mg, 85% as a yellow solid.  $^1\text{H}$  NMR (250 MHz,  $\text{CDCl}_3$ )  $\delta$  (ppm) = 7.36 – 7.27 (m, 2H), 7.25 – 7.14 (m, 5H), 7.03 (d,  $J$  = 7.6 Hz, 1H), 6.43 (s, 1H), 4.19 (t,  $J$  = 4.9 Hz, 2H), 2.68 (q,  $J$  = 7.6 Hz, 2H), 2.54 (t,  $J$  = 6.6 Hz, 2H), 2.07 – 1.95 (m, 2H), 1.16 (t,  $J$  = 7.6 Hz, 3H).  $^{13}\text{C}$  NMR (63 MHz,  $\text{CDCl}_3$ )  $\delta$  (ppm) = 170.9, 143.7, 142.5, 140.2, 136.9, 130.8, 130.6, 129.5, 128.6, 128.3, 128.1, 127.1, 125.4, 68.3, 30.2, 29.3, 26.7, 15.8. M.P.: 118.0 – 118.5 °C. HRMS (ESI):  $m/z$   $[\text{M} + \text{H}]^+$  calcd for  $\text{C}_{20}\text{H}_{20}\text{O}_2$ : 293.1536; found: 293.1534.

### Product 3ca

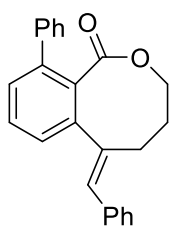

Yield of **3ca**: 137.8 mg, 81% as a white solid.  $^1\text{H}$  NMR (250 MHz,  $\text{CDCl}_3$ )  $\delta$  (ppm) = 7.45 (t,  $J$  = 7.6 Hz, 2H), 7.37 – 7.28 (m, 8H), 7.24 – 7.18 (m, 3H), 6.49 (s, 1H), 4.46 (t,  $J$  = 4.9 Hz, 2H), 2.61 (t,  $J$  = 6.5 Hz, 2H), 2.15 – 2.06 (m, 2H).  $^{13}\text{C}$  NMR (63 MHz,  $\text{CDCl}_3$ )  $\delta$  (ppm) = 170.4, 144.1, 141.0, 140.0, 139.9, 136.9, 131.9, 130.9, 129.8, 129.3, 128.6, 128.4, 128.4, 127.8, 127.2, 127.0, 68.3, 30.5, 29.3. M.P.: 201.0 – 201.5 °C. HRMS (ESI):  $m/z$   $[\text{M} + \text{H}]^+$  calcd for  $\text{C}_{24}\text{H}_{20}\text{O}_2$ : 341.1536; found: 341.1534.

### Product 3da

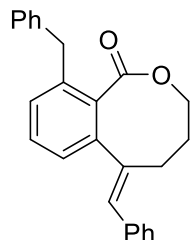

Yield of **3da**: 124.0 mg, 70% as a yellow oil.  $^1\text{H}$  NMR (250 MHz,  $\text{CDCl}_3$ )  $\delta$  (ppm) = 7.36 – 7.26 (m, 2H), 7.25 – 7.16 (m, 7H), 7.13 – 7.02 (m, 4H), 6.42 (s, 1H), 4.06 (s, 2H), 3.73 (t,  $J$  = 4.9 Hz, 2H), 2.46 (t,  $J$  = 6.6 Hz, 2H), 1.95 – 1.84 (m, 2H).  $^{13}\text{C}$  NMR (63 MHz,  $\text{CDCl}_3$ )  $\delta$  (ppm) = 170.8, 144.1, 140.1, 139.9, 136.9, 130.8, 130.6, 130.2, 129.4, 129.3, 128.5, 128.5, 128.4, 127.1, 126.3, 125.9, 68.1, 39.3, 30.0, 29.3. HRMS (ESI):  $m/z$   $[\text{M} + \text{H}]^+$  calcd for  $\text{C}_{25}\text{H}_{22}\text{O}_2$ : 355.1693; found: 355.1695.

### Product 3ea

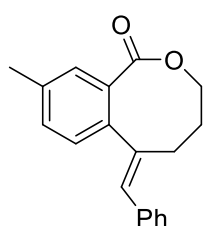

Yield of **3ea**: 69.5 mg, 50% as a yellow solid.  $^1\text{H}$  NMR (250 MHz,  $\text{CDCl}_3$ )  $\delta$  (ppm) = 7.31 (m, 2H), 7.26 (d,  $J$  = 2.6 Hz, 2H), 7.23 – 7.13 (m, 4H), 6.45 (s, 1H), 4.26 (t,  $J$  = 5.1 Hz, 2H), 2.57 (t,  $J$  = 6.4 Hz, 2H), 2.33 (s, 3H), 2.07 – 1.97 (m, 2H).  $^{13}\text{C}$  NMR (63 MHz,  $\text{CDCl}_3$ )  $\delta$  (ppm) = 172.5, 141.3, 140.5, 137.7, 137.1, 132.4, 130.6, 130.0, 129.2, 128.6, 128.4, 128.1, 127.8, 69.0, 30.3, 28.8, 20.9. M.P.: 90.0 – 90.5 °C. HRMS (ESI):  $m/z$   $[\text{M} + \text{H}]^+$  calcd for  $\text{C}_{19}\text{H}_{18}\text{O}_2$ : 279.1380; found: 279.1378.

### Product 3fa

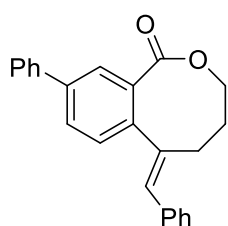

Yield of **3fa**: 105.4 mg, 62% as a yellow solid.  $^1\text{H}$  NMR (250 MHz,  $\text{CDCl}_3$ )  $\delta$  (ppm) = 7.74 (d,  $J = 2.0$  Hz, 1H), 7.66 (dd,  $J = 8.0, 2.0$  Hz, 1H), 7.58 – 7.52 (m, 2H), 7.42 – 7.37 (m, 2H), 7.36 – 7.29 (m, 4H), 7.28 – 7.14 (m, 3H), 6.53 (s, 1H), 4.31 (t,  $J = 5.2$  Hz, 2H), 2.62 (t,  $J = 6.3$  Hz, 2H), 2.09 – 1.99 (m, 2H).  $^{13}\text{C}$  NMR (63 MHz,  $\text{CDCl}_3$ )  $\delta$  (ppm) = 172.4, 143.0, 140.8, 140.4, 139.5, 137.0, 130.9, 130.7, 130.2, 129.0, 128.8, 128.6, 128.5, 127.9, 127.4, 127.2, 127.0, 69.2, 30.3, 28.8. M.P.: 148.0 – 148.5 °C. HRMS (ESI):  $m/z$   $[\text{M} + \text{H}]^+$  calcd for  $\text{C}_{24}\text{H}_{20}\text{O}_2$ : 341.1536; found: 341.1538

### Product 3ga

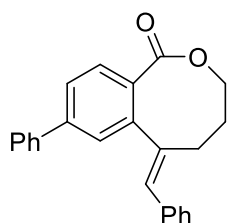

Yield of **3ga**: 95.2 mg, 56% as a yellow solid.  $^1\text{H}$  NMR (250 MHz,  $\text{CDCl}_3$ )  $\delta$  (ppm) = 7.72 (d,  $J = 2.0$  Hz, 1H), 7.64 (dd,  $J = 8.0, 2.0$  Hz, 1H), 7.57 – 7.49 (m, 2H), 7.43 – 7.29 (m, 4H), 7.29 – 7.13 (m, 5H), 6.51 (s, 1H), 4.29 (t,  $J = 5.2$  Hz, 2H), 2.61 (t,  $J = 6.3$  Hz, 2H), 2.09 – 1.95 (m, 2H).  $^{13}\text{C}$  NMR (63 MHz,  $\text{CDCl}_3$ )  $\delta$  (ppm) = 172.4, 143.0, 140.8, 140.4, 139.5, 137.0, 130.9, 130.7, 130.2, 129.0, 128.9, 128.6, 128.5, 128.0, 127.4, 127.2, 127.0, 69.2, 30.3, 28.8. M.P.: 145.5 – 146.0 °C. HRMS (ESI):  $m/z$   $[\text{M} + \text{H}]^+$  calcd for  $\text{C}_{24}\text{H}_{20}\text{O}_2$ : 341.1536; found: 341.1535

### Product 3ha

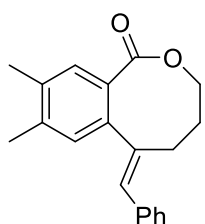

Yield of **3ha**: 87.6 mg, 60% as a white solid.  $^1\text{H}$  NMR (250 MHz,  $\text{CDCl}_3$ )  $\delta$  (ppm) = 7.33 – 7.27 (m, 2H), 7.26 – 7.20 (m, 3H), 7.19 (m, 1H), 7.02 (s, 1H), 6.43 (s, 1H), 4.25 (t,  $J = 5.1$  Hz, 2H), 2.56 (t,  $J = 6.4$  Hz, 2H), 2.24 (d,  $J = 5.8$  Hz, 6H), 2.00 (m, 2H).  $^{13}\text{C}$  NMR (63 MHz,  $\text{CDCl}_3$ )  $\delta$  (ppm) = 172.6, 141.8, 140.7, 137.2, 136.4, 130.3, 130.0, 129.4, 128.6, 128.4, 127.5, 127.0, 69.0, 30.3, 28.9, 19.9, 19.2. M.P.: 68.0 – 68.5 °C. HRMS (ESI):  $m/z$   $[\text{M} + \text{H}]^+$  calcd for  $\text{C}_{20}\text{H}_{20}\text{O}_2$ : 293.1536; found: 293.1537.

### Product 3ia

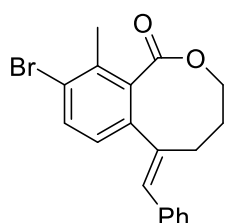

Yield of **3ia**: 112.1 mg, 63% as a white solid.  $^1\text{H}$  NMR (250 MHz,  $\text{CDCl}_3$ )  $\delta$  (ppm) = 7.57 (d,  $J = 8.2$  Hz, 1H), 7.30 (dt,  $J = 7.1, 1.3$  Hz, 1H), 7.26 – 7.14 (m, 4H), 6.92 (d,  $J = 8.6$  Hz, 1H), 6.43 (s, 1H), 4.21 (t,  $J = 5.0$  Hz, 2H), 2.52 (t,  $J = 6.6$  Hz, 2H), 2.39 (s,

3H), 2.07 – 1.96 (m, 2H).  $^{13}\text{C}$  NMR (63 MHz,  $\text{CDCl}_3$ )  $\delta$  (ppm) = 170.0, 142.9, 139.2, 136.6, 135.7, 134.6, 131.9, 131.4, 128.5, 128.4, 127.3, 126.9, 125.0, 68.6, 30.2, 29.1, 20.5. M.P.: 80.0 – 80.5 °C. HRMS (ESI):  $m/z$   $[\text{M} + \text{H}]^+$  calcd for  $\text{C}_{19}\text{H}_{17}\text{BrO}_2$ : 357.0485; found: 357.0483.

### Product 3ja

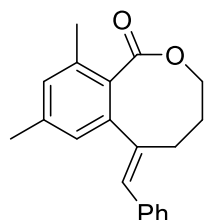

Yield of **3ja**: 124.2 mg, 85% as a white solid.  $^1\text{H}$  NMR (250 MHz,  $\text{CDCl}_3$ )  $\delta$  (ppm) = 7.32 – 7.26 (m, 1H), 7.25 – 7.13 (m, 4H), 6.90 (d,  $J$  = 28.0 Hz, 2H), 6.40 (s, 1H), 4.18 (t,  $J$  = 4.9 Hz, 2H), 2.53 (t,  $J$  = 6.6 Hz, 2H), 2.29 (d,  $J$  = 5.5 Hz, 6H), 2.06 – 1.93 (m, 2H).  $^{13}\text{C}$  NMR (63 MHz,  $\text{CDCl}_3$ )  $\delta$  (ppm) = 171.2, 143.9, 140.6, 140.5, 137.0, 136.4, 130.4, 130.3, 128.6, 128.3, 127.0, 127.0, 125.9, 68.4, 30.2, 29.2, 21.3, 19.8. M.P.: 153.0 – 153.5 °C. HRMS (ESI):  $m/z$   $[\text{M} + \text{H}]^+$  calcd for  $\text{C}_{20}\text{H}_{20}\text{O}_2$ : 293.1536; found: 293.1534.

### Product 3ka

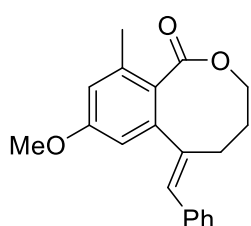

Yield of **3ka**: 110.9 mg, 72% as a white solid.  $^1\text{H}$  NMR (250 MHz,  $\text{CDCl}_3$ )  $\delta$  (ppm) = 7.33 – 7.27 (m, 1H), 7.25 (d,  $J$  = 2.4 Hz, 2H), 7.23 – 7.14 (m, 2H), 6.61 (dd,  $J$  = 29.5, 2.4 Hz, 2H), 6.42 (s, 1H), 4.20 (t,  $J$  = 5.0 Hz, 2H), 3.77 (s, 3H), 2.55 (t,  $J$  = 6.6 Hz, 2H), 2.34 (s, 3H), 2.06 – 1.96 (m, 2H).  $^{13}\text{C}$  NMR (63 MHz,  $\text{CDCl}_3$ )  $\delta$  (ppm) = 171.0, 160.9, 146.0, 140.6, 139.0, 136.9, 130.4, 128.5, 128.4, 127.1, 122.3, 115.2, 110.7, 68.4, 55.4, 30.2, 29.2, 20.2. M.P.: 165.0 – 165.5 °C. HRMS (ESI):  $m/z$   $[\text{M} + \text{H}]^+$  calcd for  $\text{C}_{20}\text{H}_{20}\text{O}_3$ : 309.1485; found: 309.1485.

### Product 3la

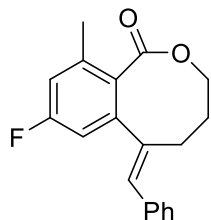

Yield of **3la**: 114.0 mg, 77% as a yellow solid.  $^1\text{H}$  NMR (250 MHz,  $\text{CDCl}_3$ )  $\delta$  (ppm) = 7.32-7.27 (m, 1H), 7.25 (d,  $J$  = 5.7 Hz, 2H), 7.23 – 7.15 (m, 2H), 6.85 (dd,  $J$  = 9.2, 2.2 Hz, 1H), 6.76 (dd,  $J$  = 8.9, 2.5 Hz, 1H), 6.43 (s, 1H), 4.20 (t,  $J$  = 5.0 Hz, 2H), 2.53 (t,  $J$  = 6.5 Hz, 2H), 2.34 (s, 3H), 2.06 – 1.96 (m, 2H).  $^{13}\text{C}$  NMR (63 MHz,  $\text{CDCl}_3$ )  $\delta$  (ppm) = 170.3, 163.3 (d,  $J$  = 249.6 Hz), 146.4 (d,  $J$  = 8.4 Hz), 139.8 (d,  $J$  = 8.7 Hz), 139.4 (d,  $J$  = 1.7 Hz), 136.5, 131.1, 128.5, 128.4, 127.34, 126.1 (d,  $J$  = 3.0 Hz), 116.5 (d,  $J$  = 20.2 Hz), 112.5 (d,  $J$  = 21.4 Hz), 68.4, 30.2, 29.0, 20.3.  $^{19}\text{F}$  NMR (376 MHz,  $\text{CDCl}_3$ )  $\delta$  (ppm) = -109.84 (s, 1F). M.P.: 65.0 – 65.5 °C. HRMS (ESI):  $m/z$   $[\text{M} + \text{H}]^+$  calcd for  $\text{C}_{19}\text{H}_{17}\text{FO}_2$ : 297.1285; found: 297.1286.

### Product 3ma

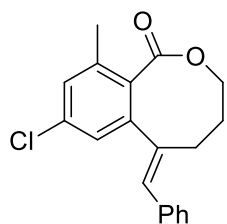

Yield of **3ma**: 101.4 mg, 65% as a brown solid.  $^1\text{H}$  NMR (250 MHz,  $\text{CDCl}_3$ )  $\delta$  (ppm) = 7.33 – 7.25 (m, 2H), 7.24 – 7.18 (m, 3H), 7.10 (ddd,  $J = 22.4, 2.0, 0.7$  Hz, 2H), 6.43 (s, 1H), 4.20 (t,  $J = 5.0$  Hz, 2H), 2.53 (t,  $J = 6.5$  Hz, 2H), 2.32 (s, 3H), 2.06 – 1.97 (m, 2H).  $^{13}\text{C}$  NMR (63 MHz,  $\text{CDCl}_3$ )  $\delta$  (ppm) = 170.1, 145.5, 139.1, 138.6, 136.5, 136.1, 131.4, 129.5, 128.5, 128.4, 127.4, 125.6, 68.5, 30.2, 29.0, 19.8. M.P.: 152.0 – 152.5 °C. HRMS (ESI):  $m/z$   $[\text{M} + \text{H}]^+$  calcd for  $\text{C}_{19}\text{H}_{17}\text{ClO}_2$ : 313.0990; found: 313.0989.

### Product 3na

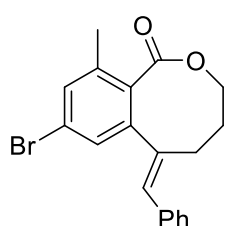

Yield of **3na**: 106.8 mg, 60% as a yellow solid.  $^1\text{H}$  NMR (250 MHz,  $\text{CDCl}_3$ )  $\delta$  (ppm) = 7.56 (d,  $J = 8.2$  Hz, 1H), 7.32 – 7.27 (m, 1H), 7.26 – 7.21 (m, 3H), 7.20 – 7.16 (m, 1H), 6.92 (d,  $J = 8.2$  Hz, 1H), 6.42 (s, 1H), 4.20 (t,  $J = 5.0$  Hz, 2H), 2.51 (t,  $J = 6.6$  Hz, 2H), 2.38 (s, 3H), 2.06 – 1.96 (m, 2H).  $^{13}\text{C}$  NMR (63 MHz,  $\text{CDCl}_3$ )  $\delta$  (ppm) = 170.0, 143.0, 139.2, 136.6, 135.6, 134.6, 131.9, 131.3, 128.5, 128.4, 127.3, 126.9, 125.0, 68.6, 30.2, 29.1, 20.6. M.P.: 82.0 – 82.5 °C. HRMS (ESI):  $m/z$   $[\text{M} + \text{H}]^+$  calcd for  $\text{C}_{19}\text{H}_{17}\text{BrO}_2$ : 357.0485; found: 357.0483.

### Product 3oa

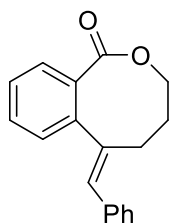

Yield of **3oa**: 68.7 mg, 52% as a yellow solid.  $^1\text{H}$  NMR (250 MHz,  $\text{CDCl}_3$ )  $\delta$  (ppm) = 7.51 (dd,  $J = 7.5, 1.3$  Hz, 1H), 7.43 (dd,  $J = 7.5, 1.6$  Hz, 1H), 7.37 – 7.28 (m, 3H), 7.27 – 7.18 (m, 4H), 6.46 (s, 1H), 4.26 (t,  $J = 5.1$  Hz, 2H), 2.59 (t,  $J = 6.4$  Hz, 2H), 2.04 (m, 2H).  $^{13}\text{C}$  NMR (63 MHz,  $\text{CDCl}_3$ )  $\delta$  (ppm) = 172.2, 144.2, 140.6, 137.0, 131.7, 130.8, 130.2, 128.8, 128.6, 128.4, 128.3, 127.8, 127.2, 69.1, 30.2, 28.9. M.P.: 118.0 – 118.5 °C. HRMS (ESI):  $m/z$   $[\text{M} + \text{H}]^+$  calcd for  $\text{C}_{18}\text{H}_{16}\text{O}_2$ : 265.1223; found: 265.1224.

### Product 3pa

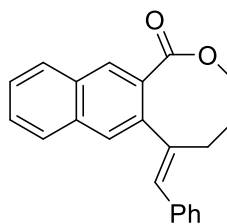

Yield of **3pa**: 73.8 mg, 47% as a yellow oil.  $^1\text{H}$  NMR (250 MHz,  $\text{CDCl}_3$ )  $\delta$  (ppm) = 8.08 (s, 1H), 7.89 – 7.76 (m, 3H), 7.72 (s, 1H), 7.55 – 7.43 (m, 3H), 7.31 (s, 1H), 7.26 – 7.17 (m, 2H), 6.55 (s, 1H), 4.30 (t,  $J = 5.2$  Hz, 2H), 2.70 (t,  $J = 6.4$  Hz, 2H), 2.06 (m, 2H).  $^{13}\text{C}$  NMR (63 MHz,  $\text{CDCl}_3$ )  $\delta$  (ppm) = 172.3, 141.2, 141.0, 137.1, 134.7, 132.0, 131.0, 129.6, 129.0, 128.6, 128.5, 128.5, 128.1, 127.8, 127.2, 127.2, 126.8, 69.4, 30.2, 29.8. HRMS (ESI):  $m/z$   $[\text{M} + \text{H}]^+$  calcd for  $\text{C}_{22}\text{H}_{18}\text{O}_2$ : 315.1380; found: 315.1381



### Product 3qa

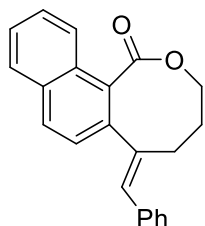

Yield of **3qa**: 84.8 mg, 54% as a yellow solid.  $^1\text{H}$  NMR (250 MHz,  $\text{CDCl}_3$ )  $\delta$  (ppm) = 8.03 – 7.96 (m, 1H), 7.90 (d,  $J$  = 8.4 Hz, 1H), 7.85 – 7.79 (m, 1H), 7.55 – 7.45 (m, 2H), 7.35 – 7.18 (m, 6H), 6.55 (s, 1H), 4.22 (t,  $J$  = 4.9 Hz, 2H), 2.63 (t,  $J$  = 6.6 Hz, 2H), 2.14 – 2.00 (m, 2H).  $^{13}\text{C}$  NMR (63 MHz,  $\text{CDCl}_3$ )  $\delta$  (ppm) = 170.5, 141.6, 140.2, 136.8, 132.6, 131.3, 131.2, 129.8, 128.6, 128.4, 128.2, 127.9, 127.3, 126.6, 126.4, 125.5, 125.5, 68.6, 30.3, 28.5. M.P.: 146.0 – 146.5 °C. HRMS (ESI):  $m/z$   $[\text{M} + \text{H}]^+$  calcd for  $\text{C}_{22}\text{H}_{18}\text{O}_2$ : 315.1380; found: 315.1357.

### Product 3ra

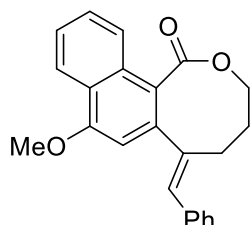

Yield of **3ra**: 82.6 mg, 48% as a yellow solid.  $^1\text{H}$  NMR (250 MHz,  $\text{CDCl}_3$ )  $\delta$  (ppm) = 8.97 (d,  $J$  = 8.2 Hz, 1H), 8.23 (d,  $J$  = 8.4 Hz, 1H), 8.17 (d,  $J$  = 8.3 Hz, 1H), 7.57 – 7.49 (m, 1H), 7.45 – 7.37 (m, 1H), 7.34 – 7.28 (m, 2H), 7.20 – 7.15 (m, 3H), 6.64 (d,  $J$  = 8.3 Hz, 1H), 4.45 (t,  $J$  = 6.3 Hz, 2H), 3.92 (s, 3H), 2.55 (t,  $J$  = 7.0 Hz, 2H), 1.98 – 2.09 (m, 2H).  $^{13}\text{C}$  NMR (63 MHz,  $\text{CDCl}_3$ )  $\delta$  (ppm) = 167.2, 159.4, 132.9, 132.3, 131.6, 128.3, 128.2, 127.7, 125.8, 125.7, 125.5, 123.8, 122.3, 118.9, 102.5, 88.9, 81.4, 63.5, 55.8, 28.1, 16.6. M.P.: 43.0 – 43.5 °C. HRMS (ESI):  $m/z$   $[\text{M} + \text{H}]^+$  calcd for  $\text{C}_{23}\text{H}_{20}\text{O}_3$ : 345.1485; found: 345.1482.

### Product 3sa

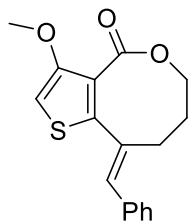

Yield of **3sa**: 60.0 mg, 40% as a brown oil.  $^1\text{H}$  NMR (250 MHz,  $\text{CDCl}_3$ )  $\delta$  (ppm) = 8.05 (d,  $J$  = 3.6 Hz, 1H), 7.45 – 7.37 (m, 2H), 7.33 – 7.27 (m, 3H), 6.30 (d,  $J$  = 3.6 Hz, 1H), 4.45 (t,  $J$  = 6.2 Hz, 2H), 3.92 (s, 3H), 2.61 (t,  $J$  = 7.0 Hz, 2H), 1.91 – 2.02 (m, 2H).  $^{13}\text{C}$  NMR (63 MHz,  $\text{CDCl}_3$ )  $\delta$  (ppm) = 161.7, 157.7, 133.4, 131.6, 128.2, 127.7, 123.7, 123.4, 98.1, 88.8, 81.3, 63.2, 58.0, 28.0. HRMS (ESI):  $m/z$   $[\text{M} + \text{H}]^+$  calcd for  $\text{C}_{17}\text{H}_{16}\text{O}_3\text{S}$ : 301.0893; found: 301.0895.

### Product 3ab

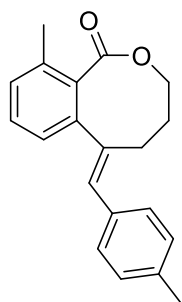

Yield of **3ab**: 113.9 mg, 78% as a yellow solid.  $^1\text{H}$  NMR (600 MHz,  $\text{CDCl}_3$ )  $\delta$  (ppm) = 7.35 (t,  $J$  = 7.6 Hz, 1H), 7.22–7.20 (m, 3H), 7.16 (d,  $J$  = 7.9 Hz, 2H), 7.10 (d,  $J$  = 7.5 Hz, 1H), 6.46 (s, 1H), 4.27 (t,  $J$  = 4.9 Hz, 2H), 2.62 (t,  $J$  = 5.0 Hz, 2H), 2.42 (s, 3H), 2.36 (s,

3H), 2.12 – 2.08 (m, 2H).  $^{13}\text{C}$  NMR (150 MHz,  $\text{CDCl}_3$ )  $\delta$  (ppm) = 171.1, 144.0, 139.5, 136.9, 136.2, 134.0, 130.6, 130.5, 129.9, 129.4, 129.1, 128.5, 125.4, 68.5, 30.2, 29.3, 21.3, 19.9. M.P.: 60.0 – 60.5 °C. HRMS (ESI):  $m/z$   $[\text{M} + \text{H}]^+$  calcd for  $\text{C}_{20}\text{H}_{20}\text{O}_2$ : 293.1536; found: 293.1537.

#### Product 3ac

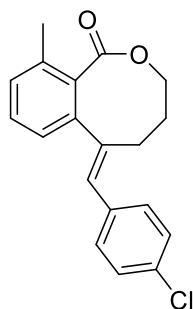

Yield of **3ac**: 98.3 mg, 63% as a red oil.  $^1\text{H}$  NMR (600 MHz,  $\text{CDCl}_3$ )  $\delta$  (ppm) = 7.36 (t,  $J$  = 7.6 Hz, 1H), 7.34 – 7.31 (m, 2H), 7.25 – 7.22 (m, 3H), 7.09 (d,  $J$  = 7.6 Hz, 1H), 6.44 (s, 1H), 4.27 (t,  $J$  = 4.9 Hz, 2H), 2.59 (t,  $J$  = 6.6 Hz, 2H), 2.42 (s, 3H), 2.11 – 2.04 (m, 2H).  $^{13}\text{C}$  NMR (150 MHz,  $\text{CDCl}_3$ )  $\delta$  (ppm) = 170.8, 143.4, 141.0, 136.3, 135.3, 132.9, 130.5, 129.8, 129.6, 129.6, 129.5, 128.5, 125.1, 68.3, 30.07, 29.2, 19.8. HRMS (ESI):  $m/z$   $[\text{M} + \text{H}]^+$  calcd for  $\text{C}_{19}\text{H}_{17}\text{ClO}_2$ : 313.0990; found: 313.0990.

#### Product 3ad

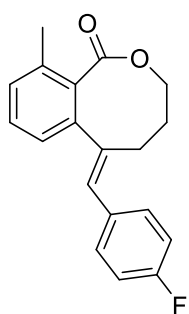

Yield of **3ad**: 93.2 mg, 63% as a yellow solid.  $^1\text{H}$  NMR (600 MHz,  $\text{CDCl}_3$ )  $\delta$  (ppm) = 7.36 (t,  $J$  = 7.6 Hz, 1H), 7.26 – 7.29 (m, 2H), 7.22 (d,  $J$  = 7.6 Hz, 1H), 7.10 (d,  $J$  = 7.6 Hz, 1H), 7.05 (t,  $J$  = 8.7 Hz, 2H), 6.45 (s, 1H), 4.28 – 4.26 (m, 2H), 2.59 (t,  $J$  = 6.6 Hz, 2H), 2.42 (s, 3H), 2.11 – 2.07 (m, 2H).  $^{13}\text{C}$  NMR (100 MHz,  $\text{CDCl}_3$ )  $\delta$  (ppm) = 170.9, 161.8 (d,  $J$  = 245.3 Hz), 143.5, 140.3, 136.3, 132.9, 132.9, 130.5, 130.2 (d,  $J$  = 3.4 Hz), 129.8, 129.6 (d,  $J$  = 2.4 Hz), 125.2, 115.3 (d,  $J$  = 21.2 Hz), 68.4, 30.1, 29.2, 19.8.  $^{19}\text{F}$  NMR (376 MHz,  $\text{CDCl}_3$ )  $\delta$  (ppm) = -114.80 (s, 1F). M.P.: 66.0 – 66.5 °C. HRMS (ESI):  $m/z$   $[\text{M} + \text{H}]^+$  calcd for  $\text{C}_{19}\text{H}_{17}\text{FO}_2$ : 297.1285; found: 297.1283.

#### Product 3ae

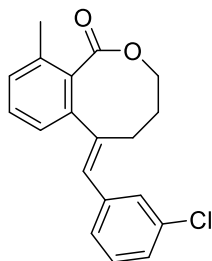

Yield of **3ae**: 95.2 mg, 61% as a yellow solid.  $^1\text{H}$  NMR (600 MHz,  $\text{CDCl}_3$ )  $\delta$  (ppm) = 7.36 (t,  $J$  = 7.6 Hz, 1H), 7.30 – 7.27 (m, 2H), 7.25 – 7.22 (m, 2H), 7.18 (d,  $J$  = 7.7 Hz, 1H), 7.09 (d,  $J$  = 7.6 Hz, 1H), 6.44 (s, 1H), 4.27 (t,  $J$  = 4.9 Hz, 2H), 2.60 (t,  $J$  = 6.3 Hz, 2H), 2.42 (s, 3H), 2.11 – 2.07 (m, 2H).  $^{13}\text{C}$  NMR (150 MHz,  $\text{CDCl}_3$ )  $\delta$  (ppm) = 170.8, 143.3, 141.8, 138.6, 136.4, 134.2, 130.6, 129.7, 129.6, 129.4, 128.5, 127.2, 126.8, 125.2, 68.3, 30.2, 29.2, 19.9. M.P.: 100.0 – 100.5 °C. HRMS (ESI):  $m/z$   $[\text{M} + \text{H}]^+$  calcd for  $\text{C}_{19}\text{H}_{17}\text{ClO}_2$ : 313.0990; found: 313.0990.

### Product 3af

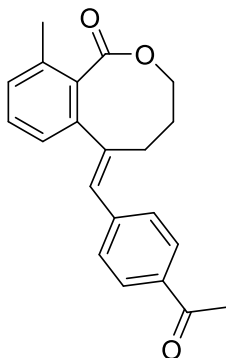

Yield of **3af**: 96.0 mg, 60% as a white solid.  $^1\text{H}$  NMR (600 MHz,  $\text{CDCl}_3$ )  $\delta$  (ppm) = 7.96 (d,  $J = 6.3$  Hz, 2H), 7.41 – 7.39 (m, 2H), 7.38 – 7.35 (m, 1H), 7.24 (d,  $J = 7.6$  Hz, 1H), 7.11 (d,  $J = 7.5$  Hz, 1H), 6.53 (s, 1H), 4.28 (t,  $J = 3.7$  Hz, 2H), 2.64 – 2.60 (m, 5H), 2.43 (s, 3H), 2.12 – 2.08 (m, 2H).  $^{13}\text{C}$  NMR (150MHz,  $\text{CDCl}_3$ )  $\delta$  (ppm) = 197.7, 170.8, 143.4, 142.6, 141.7, 136.5, 135.6, 130.6, 129.8, 129.8, 129.5, 128.7, 128.5, 125.1, 68.3, 30.2, 29.4, 26.7, 19.9. M.P.: 139.0 – 139.5 °C. HRMS (EI):  $m/z$   $[\text{M} + \text{H}]^+$  calcd for  $\text{C}_{21}\text{H}_{20}\text{O}_3$ : 321.1485; found: 321.1487

### Product 3ag

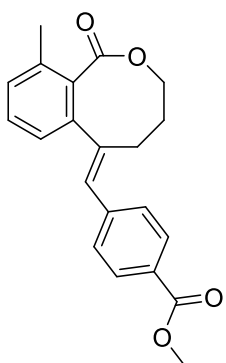

Yield of **3ag**: 107.6 mg, 64% as a white solid.  $^1\text{H}$  NMR (600 MHz,  $\text{CDCl}_3$ )  $\delta$  (ppm) = 8.03 (d,  $J = 8.4$  Hz, 2H), 7.39 – 7.36 (m, 3H), 7.24 (d,  $J = 7.7$  Hz, 1H), 7.11 (d,  $J = 7.4$  Hz, 1H), 6.52 (s, 1H), 4.28 (t,  $J = 4.9$  Hz, 2H), 3.93 (s, 3H), 2.62 (t,  $J = 6.6$  Hz, 2H), 2.43 (s, 3H), 2.12 – 2.08 (m, 2H).  $^{13}\text{C}$  NMR (150 MHz,  $\text{CDCl}_3$ )  $\delta$  (ppm) = 170.8, 166.9, 143.4, 142.4, 141.5, 136.4, 130.6, 129.9, 129.7, 129.7, 129.6, 128.7, 128.5, 125.1, 68.3, 52.7, 30.2, 29.4, 19.9. M.P.: 106.0 – 106.5 °C. HRMS (ESI):  $m/z$   $[\text{M} + \text{H}]^+$  calcd for  $\text{C}_{21}\text{H}_{20}\text{O}_4$ : 337.1434; found: 337.1436.

### Product 3ah

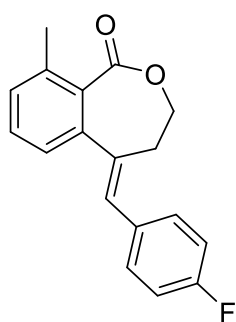

Yield of **3ah**: 98.2 mg, 69 % as a white solid.  $^1\text{H}$  NMR (400 MHz,  $\text{CDCl}_3$ )  $\delta$  (ppm) = 7.41 (t,  $J = 7.6$  Hz, 1H), 7.31 – 7.26 (m, 2H), 7.26 – 7.23 (m, 1H), 7.15 (dd,  $J = 7.6$ , 1.3 Hz, 1H), 7.08 – 7.03 (m, 2H), 6.58 (s, 1H), 4.29 (t,  $J = 5.6$  Hz, 2H), 3.05 (t,  $J = 4.6$  Hz, 2H), 2.49 (s, 3H).  $^{13}\text{C}$  NMR (101 MHz,  $\text{CDCl}_3$ )  $\delta$  (ppm) = 170.2, 161.9 (d,  $J = 246.1$  Hz), 140.3, 138.5, 136.8, 132.5 (d,  $J = 3.3$  Hz), 132.3, 131.6, 130.9 (d,  $J = 1.9$  Hz), 130.7, 128.9, 126.3, 115.3 (d,  $J = 21.4$  Hz), 65.3, 33.4, 20.6. M.P.: 152.0 – 153.1 °C.  $^{19}\text{F}$  NMR (376 MHz,  $\text{CDCl}_3$ )  $\delta$  (ppm) = -113.91 (s, 1F).

### Product 3dh

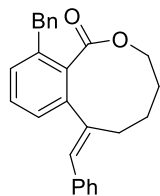

Yield of **3dh**: 93.9 mg, 51% as a colorless oil.  $^1\text{H}$  NMR (400 MHz,  $\text{CDCl}_3$ )  $\delta$  (ppm) = 7.42 (d,  $J = 7.6$  Hz, 2H), 7.34 (m, 3H), 7.30 – 7.26 (m, 3H), 7.24 – 7.10 (m, 5H), 6.54 (s, 1H),

4.31 (t,  $J = 5.3$  Hz, 2H), 4.25 (s, 2H), 2.75 (s, 2H), 1.77 – 1.63 (m, 4H).  $^{13}\text{C}$  NMR (101 MHz,  $\text{CDCl}_3$ )  $\delta$  (ppm) = 168.8, 147.6, 144.2, 140.8, 140.7, 138.3, 130.5, 129.6, 129.2, 128.9, 128.8, 128.6, 128.4, 128.3, 128.3, 126.6, 126.1, 66.9, 38.7, 32.8, 26.2, 25.1. HRMS (ESI):  $m/z$   $[\text{M} + \text{H}]^+$  calcd for  $\text{C}_{26}\text{H}_{24}\text{O}_2$ : 369.1849; found: 369.1846.

### Product 3di

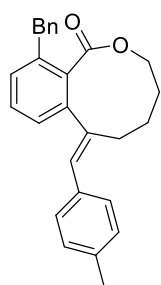

Yield of **3di**: 101.3 mg, 53% as a white solid.  $^1\text{H}$  NMR (400 MHz,  $\text{CDCl}_3$ )  $\delta$  (ppm) = 77.33 – 7.25 (m, 6H), 7.21 (q,  $J = 7.5, 6.9$  Hz, 3H), 7.17 – 7.10 (m, 3H), 6.50 (s, 1H), 4.31 (t,  $J = 5.2$  Hz, 2H), 4.24 (s, 2H), 2.75 (t,  $J = 5.3$  Hz, 2H), 2.36 (s, 3H), 1.76 – 1.67 (m, 4H).  $^{13}\text{C}$  NMR (101 MHz,  $\text{CDCl}_3$ )  $\delta$  (ppm) = 168.9, 147.7, 143.5, 140.8, 140.7, 136.4, 135.4, 130.5, 129.8, 129.6, 129.2, 129.0, 128.8, 128.6, 128.4, 128.3, 126.1, 66.9, 38.7, 32.9, 36.2, 25.2, 21.3. M.P.: 83.0 – 83.5 °C. HRMS (ESI):  $m/z$   $[\text{M} + \text{H}]^+$  calcd for  $\text{C}_{27}\text{H}_{26}\text{O}_2$ : 383.2006; found: 383.2002.

### Product 2f

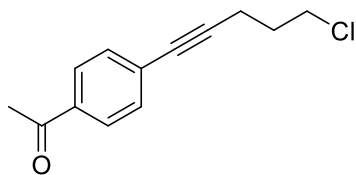

Yield of **2f**: 935 mg, 85 % as a yellow oil.  $^1\text{H}$  NMR (400 MHz,  $\text{CDCl}_3$ )  $\delta$  = 7.65 (d,  $J = 8.4$  Hz, 2H), 7.25 (d,  $J = 8.4$  Hz, 2H), 3.51 (t,  $J = 6.4$  Hz, 2H), 2.42 (t,  $J = 6.9$  Hz, 2H), 2.35 (s, 3H), 1.85 (p,  $J = 6.6$  Hz, 2H).  $^{13}\text{C}$  NMR (101 MHz,  $\text{CDCl}_3$ )  $\delta$  = 196.8, 135.7, 131.5, 128.3, 128.0, 91.9, 80.9, 43.6, 31.2, 26.3, 16.8.

## 4. Mechanistic studies

### a) control experiment

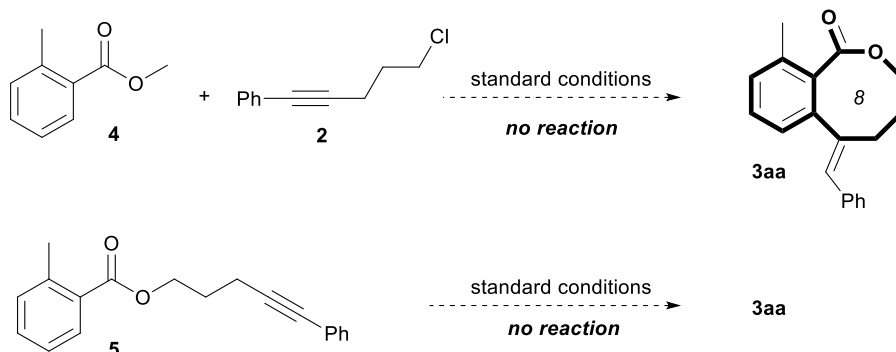

**4** (75.0 mg, 0.5 mmol), **2a** (133.6 mg, 0.75 mmol),  $[\text{Ru}_2(p\text{-cymene})_2]$  (2 mol%),  $\text{K}_2\text{CO}_3$  (13.7 mg, 0.1 mmol) and guanidine carbonate (27.0 mg, 0.15 mmol) were dissolved in 1-butanol/ $\text{H}_2\text{O}$  (0 mL, 9/1). Then, the mixture was stirred at 100 °C for 16 h, as monitored by TLC and GC analysis.

As a result, 2-methylbenzoate proved to be ineffective for this catalytic system, which demonstrated the importance of the carboxylate group in this reaction.

**5** (139.0 mg, 0.5 mmol),  $[\text{RuI}_2(p\text{-cymene})]_2$  (2 mol%),  $\text{K}_2\text{CO}_3$  (13.7 mg, 0.1 mmol) and guanidine carbonate (27.0 mg, 0.15 mmol) were dissolved in 1-butanol/ $\text{H}_2\text{O}$  (0 mL, 9/1). Then, the mixture was stirred at 100 °C for 16 h, as monitored by TLC and GC analysis. *No product can be detected, which indicated that compound 5 may not be the intermediate in this reaction.*

b) competitive experiment

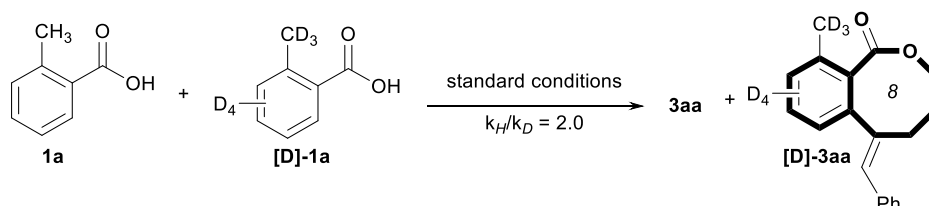

**1a** (13.6 mg, 0.1 mmol), **[D]-1a** (14.3 mg, 0.1 mmol), and **2a** (53.4 mg, 0.3 mmol),  $[\text{RuI}_2(p\text{-cymene})]_2$  (2 mol%),  $\text{K}_2\text{CO}_3$  (5.5 mg, 0.04 mmol) and guanidine carbonate (8.1 mg, 0.06 mmol) were dissolved in 1-butanol/ $\text{H}_2\text{O}$  (0.4 mL, 9/1). Then, the mixture was stirred at 100 °C for 16 h. Yields determined by  $^1\text{H}$  NMR spectroscopy using 1,3,5-trimethoxybenzene as the internal standard:  $k_{\text{H}}/k_{\text{D}} = 2.0:1$ .

c) parallel experiment

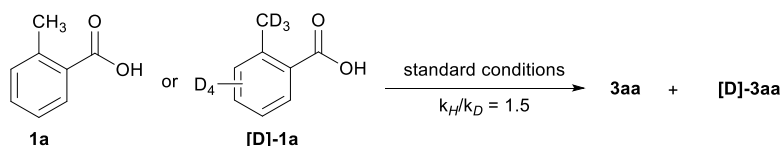

**1a** (27.2 mg, 0.2 mmol) or **[D]-1a** (28.6 mg, 0.2 mmol), and **2a** (106.8 mg, 0.6 mmol),  $[\text{RuI}_2(p\text{-cymene})]_2$  (2 mol%),  $\text{K}_2\text{CO}_3$  (10.9 mg, 0.08 mmol) and guanidine carbonate (21.6 mg, 0.12 mmol) were dissolved in 1-butanol/ $\text{H}_2\text{O}$  (0.4 mL, 9/1). Then, the mixture was stirred at 100 °C for 16 h. Yields determined by  $^1\text{H}$  NMR spectroscopy using 1,3,5-trimethoxybenzene as the internal standard:  $k_{\text{H}}/k_{\text{D}} = 1.5:1$ .

*The kinetic isotope effects (KIE) in both competitive ( $k_{\text{H}}/k_{\text{D}} = 2.0:1$ ) and parallel ( $k_{\text{H}}/k_{\text{D}} = 1.5:1$ ) reactions, indicating the ruthenium-catalyzed C–H bond activation may be the rate-determining step in this transformation.*

## 5. X-Ray structure of 3ka

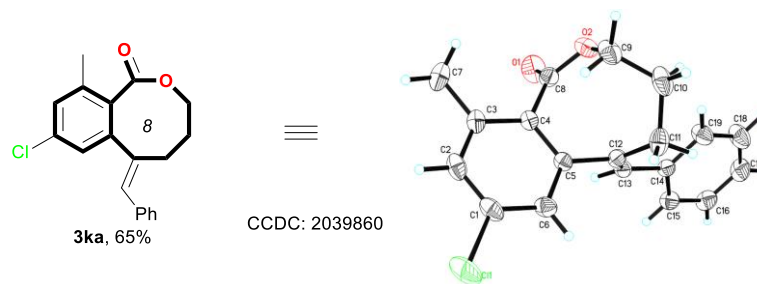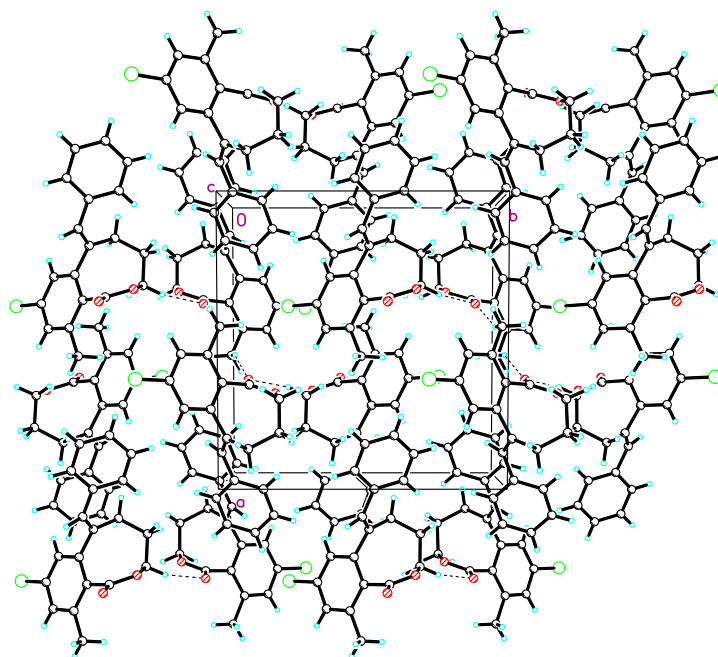

CCDC number: 2039860

## 6. NMR Spectra of products 3aa–3sa, 3ab–3ag, 3ah, 3dh, 3di and 2f

### $^1\text{H}$ NMR (250 MHz, $\text{CDCl}_3$ ) and $^{13}\text{C}$ NMR (63 MHz, $\text{CDCl}_3$ ) spectra of product 3aa

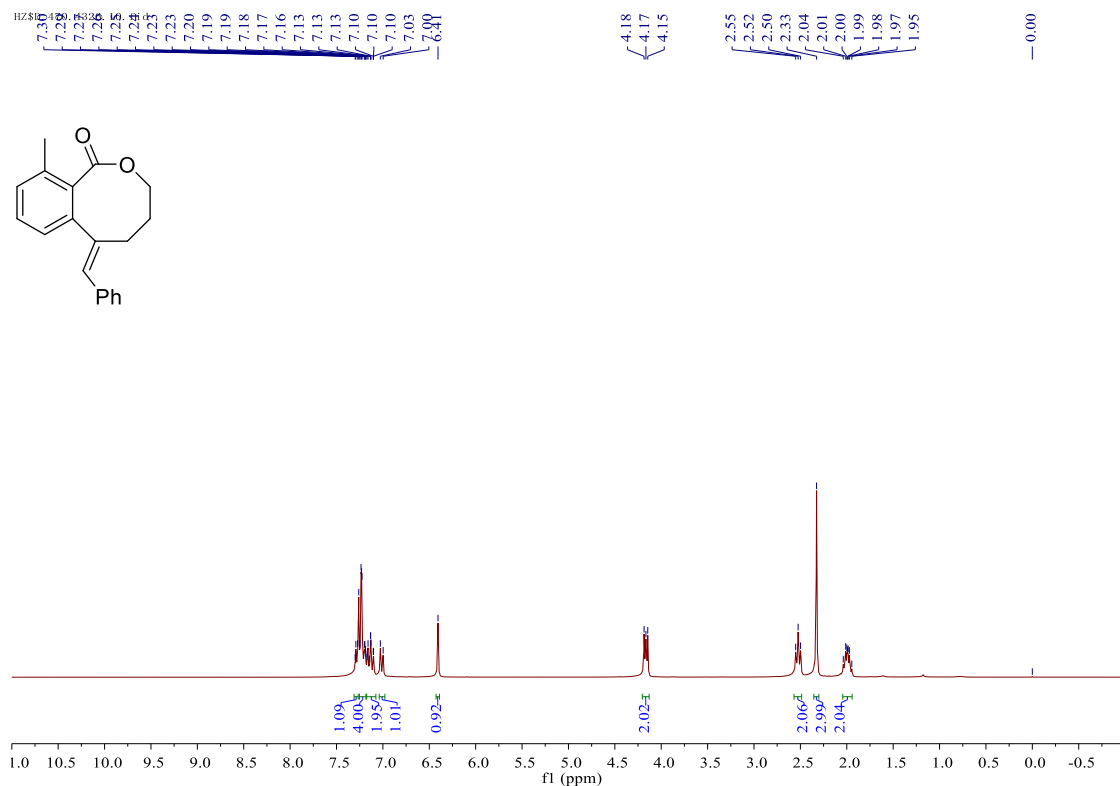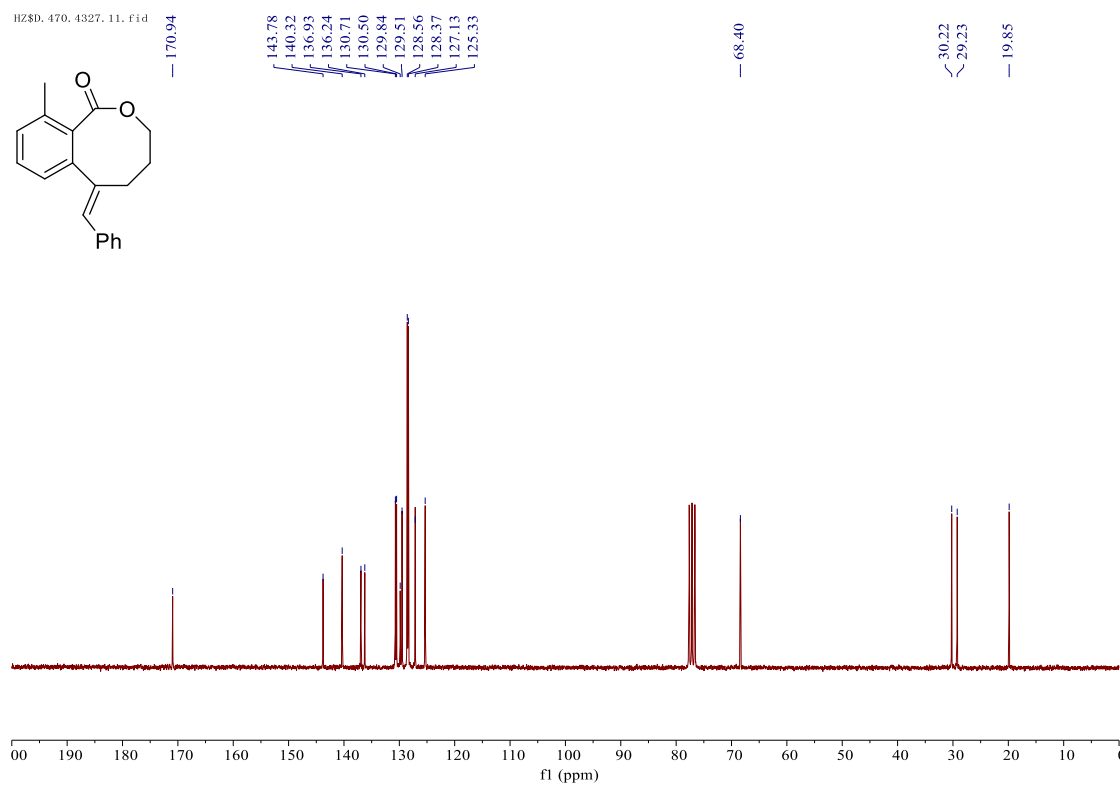

**$^1\text{H}$  NMR (250 MHz,  $\text{CDCl}_3$ ) and  $^{13}\text{C}$  NMR (63 MHz,  $\text{CDCl}_3$ ) spectra of product 3ba**

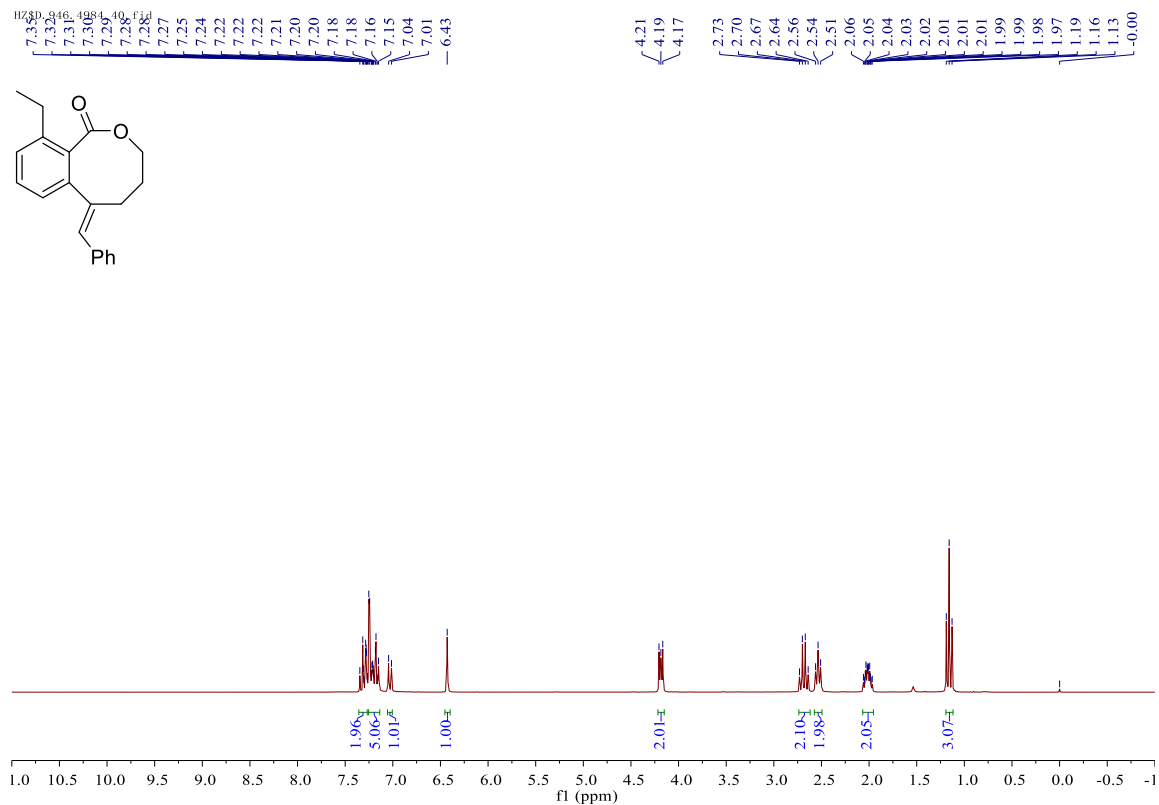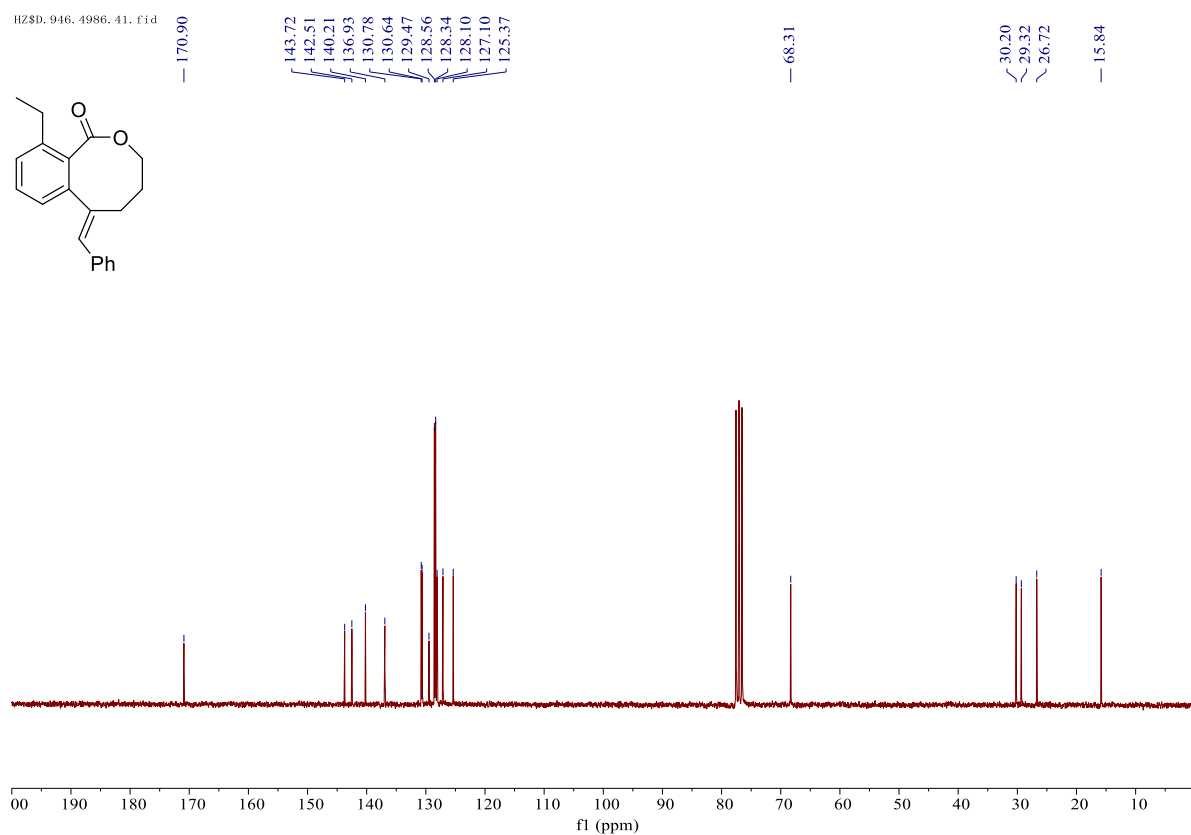



# <sup>1</sup>H NMR (250 MHz, CDCl<sub>3</sub>) and <sup>13</sup>C NMR (63 MHz, CDCl<sub>3</sub>) spectra of product 3ca

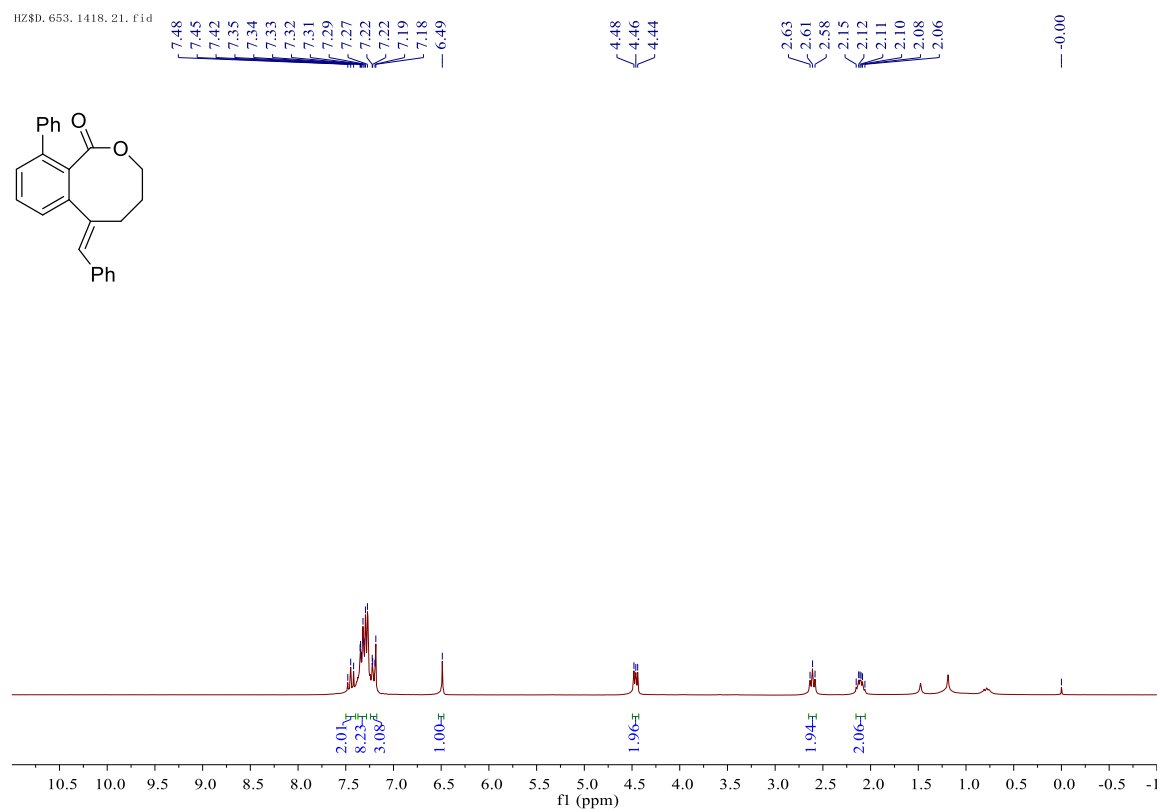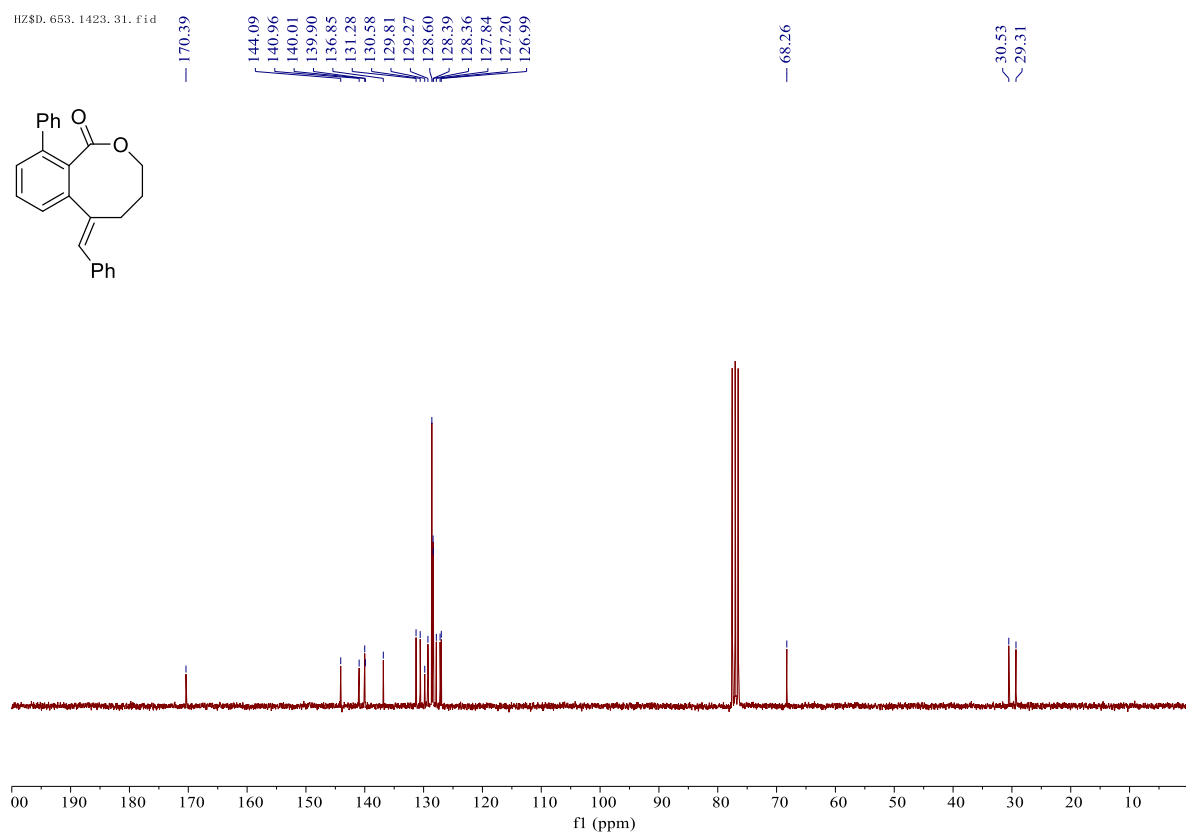

**<sup>1</sup>H NMR (250 MHz, CDCl<sub>3</sub>) and <sup>13</sup>C NMR (63 MHz, CDCl<sub>3</sub>) spectra of product 3da**

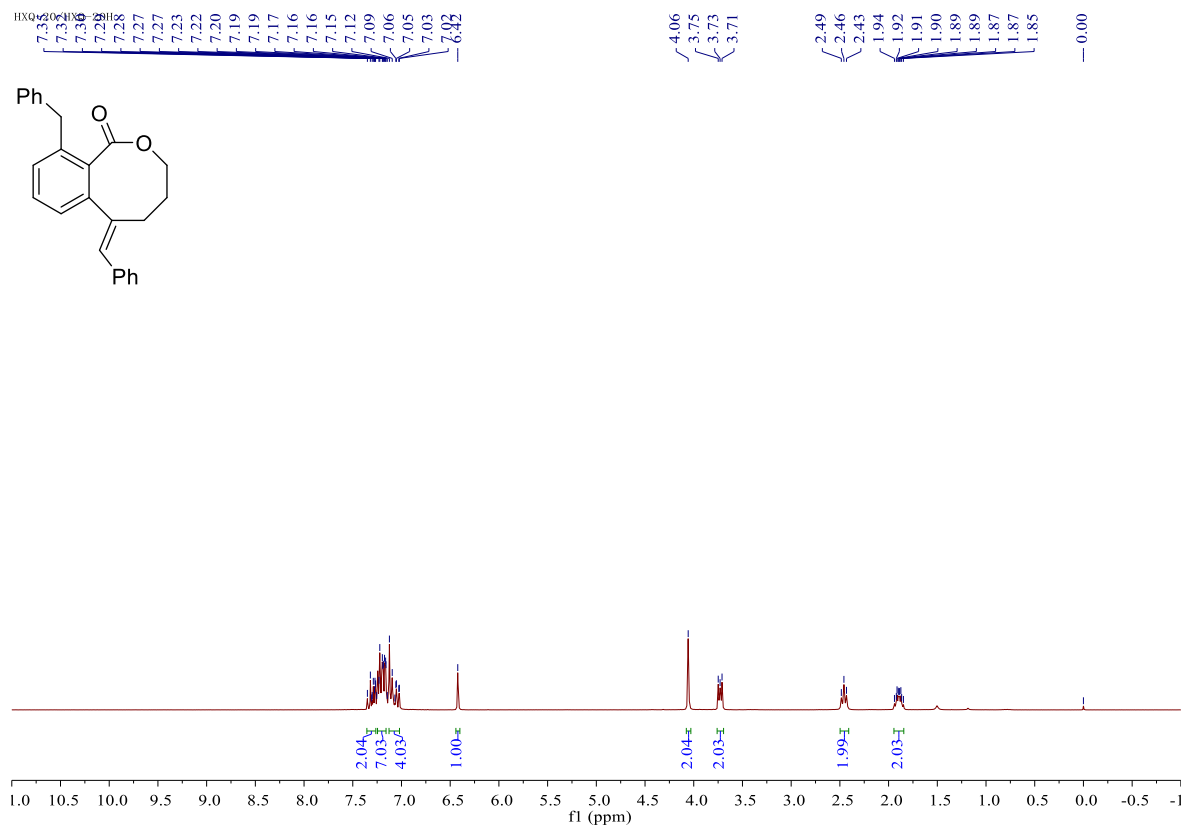

# <sup>1</sup>H NMR (250 MHz, CDCl<sub>3</sub>) and <sup>13</sup>C NMR (63 MHz, CDCl<sub>3</sub>) spectra of product 3ea

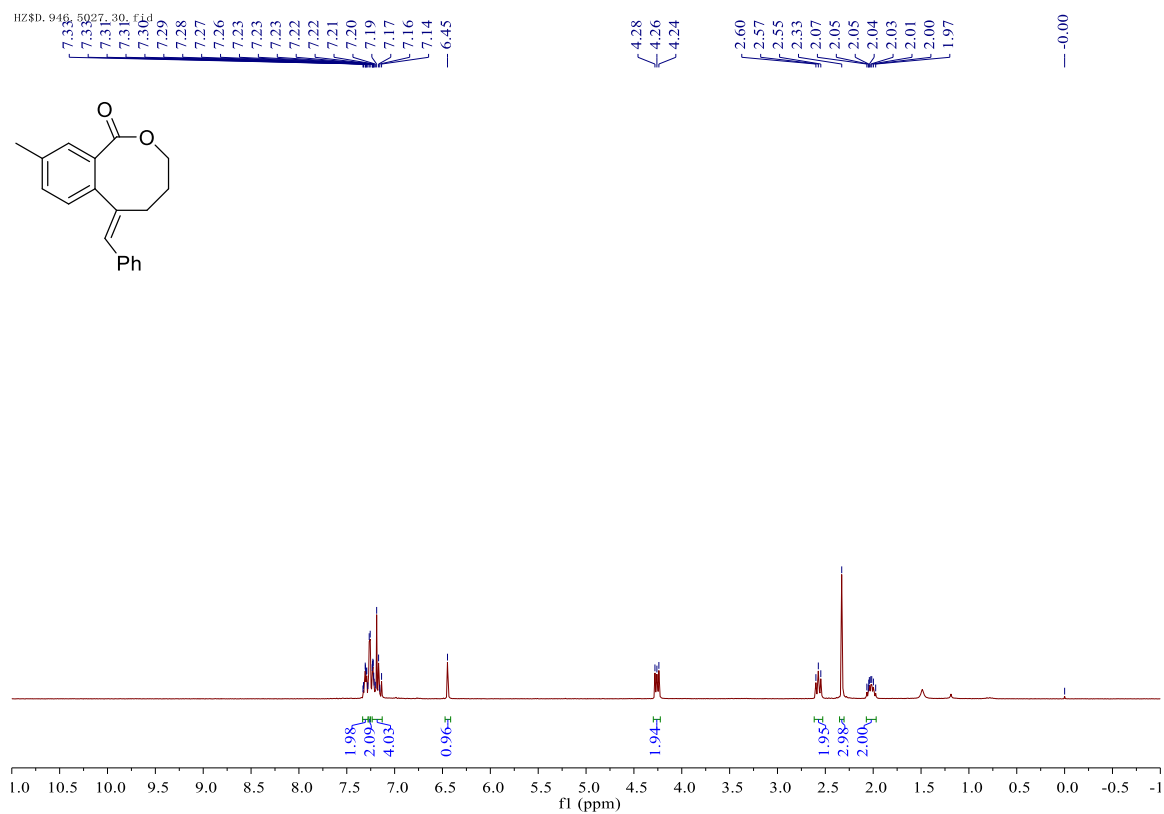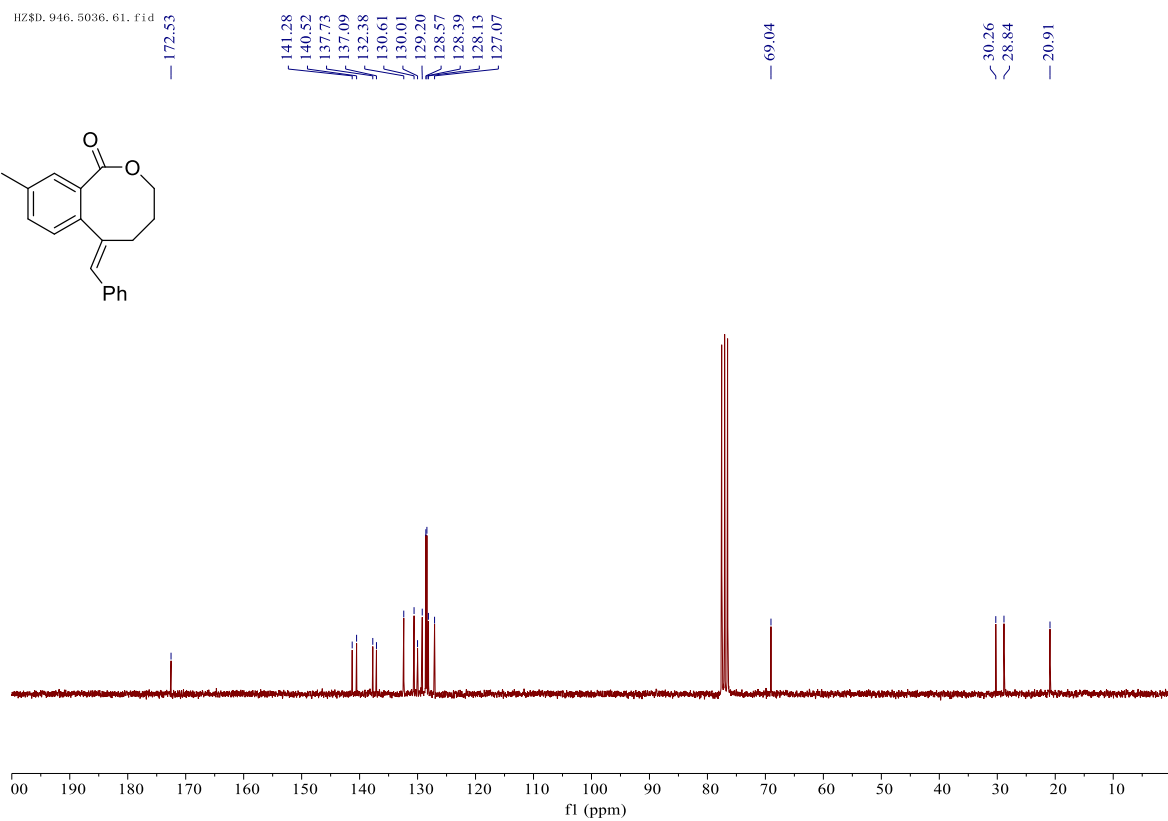

**$^1\text{H}$  NMR (250 MHz,  $\text{CDCl}_3$ ) and  $^{13}\text{C}$  NMR (63 MHz,  $\text{CDCl}_3$ ) spectra of product 3fa**

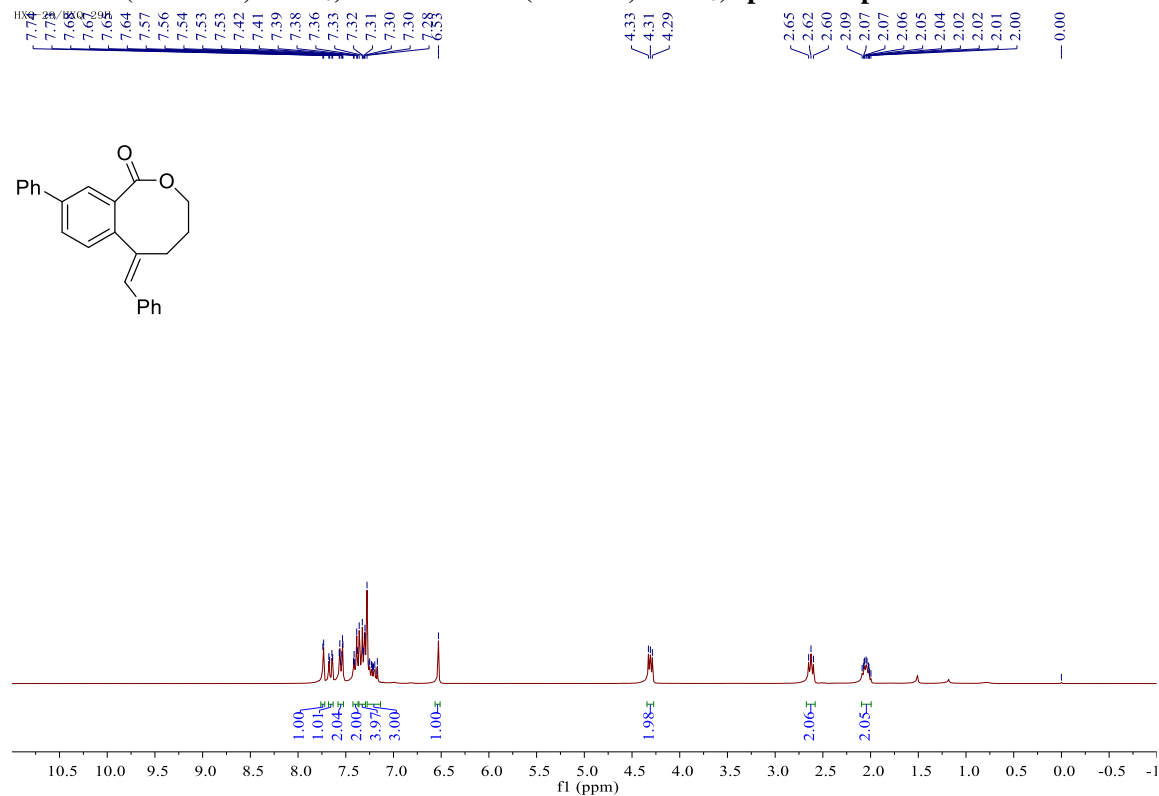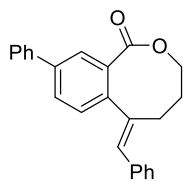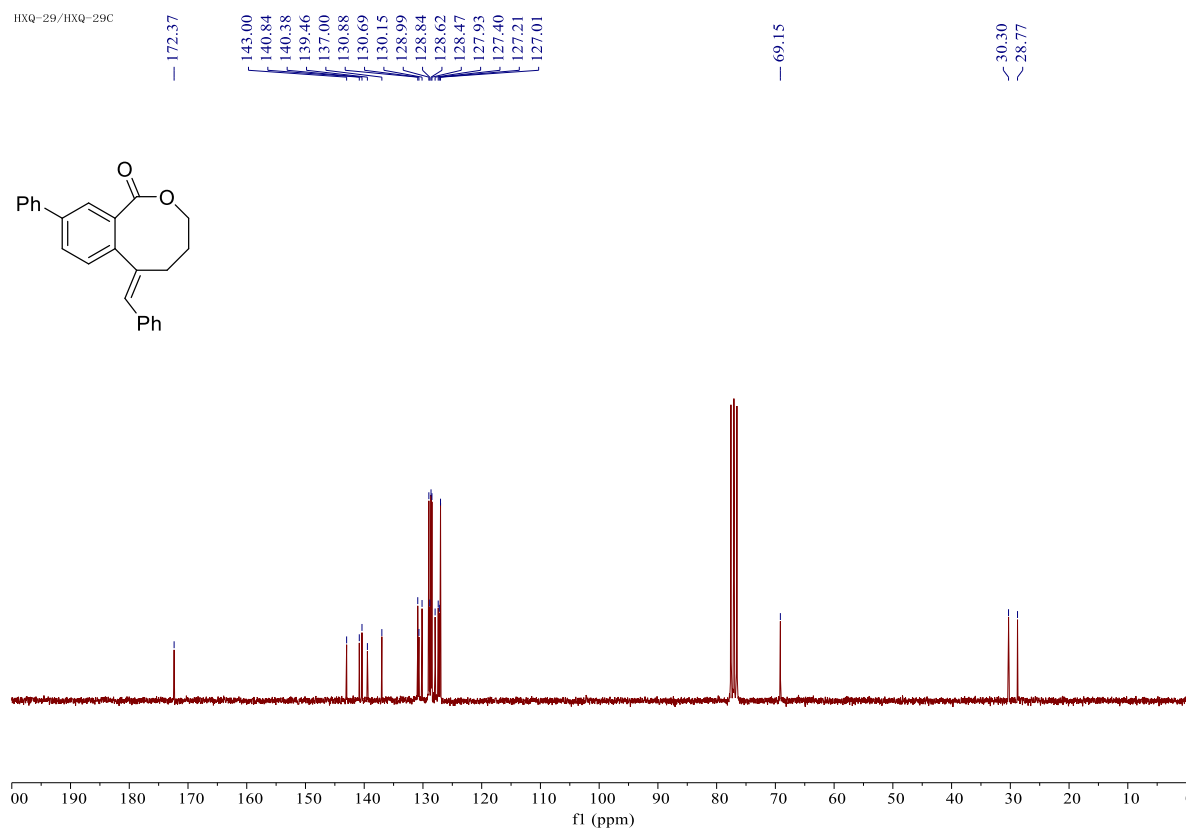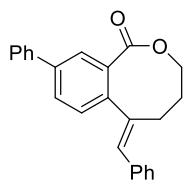

**$^1\text{H}$  NMR (250 MHz,  $\text{CDCl}_3$ ) and  $^{13}\text{C}$  NMR (63 MHz,  $\text{CDCl}_3$ ) spectra of product 3ga**

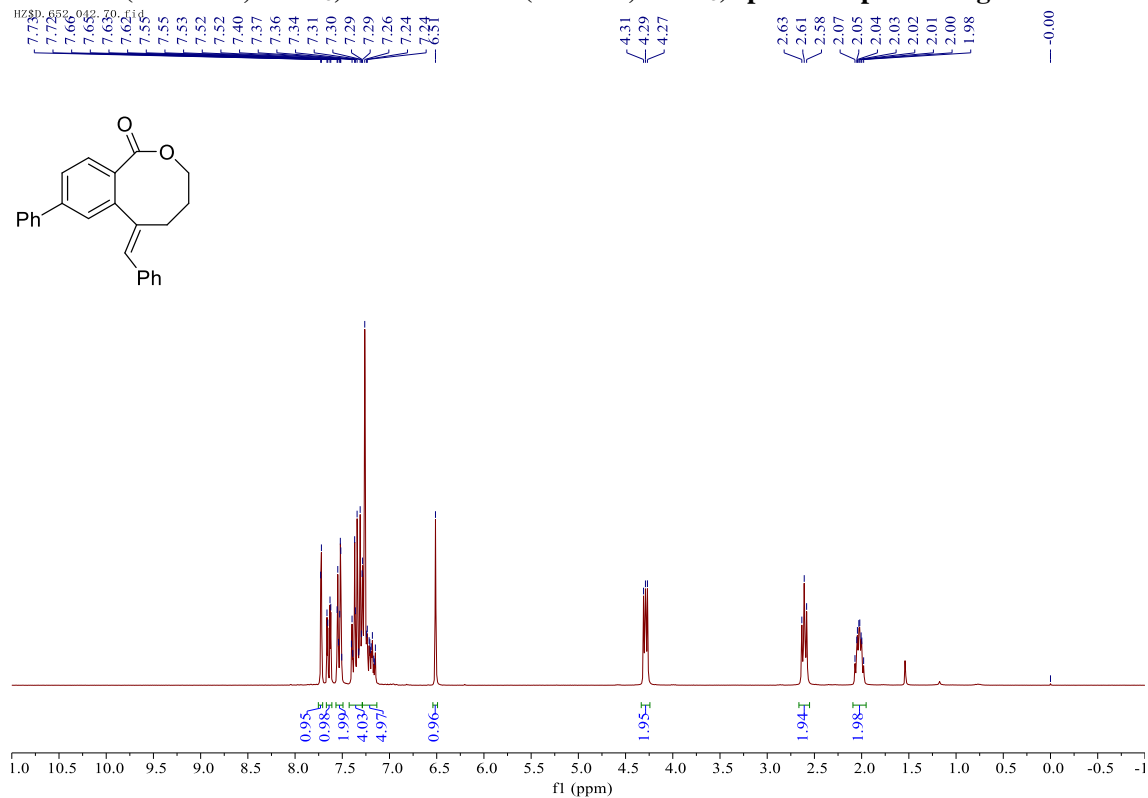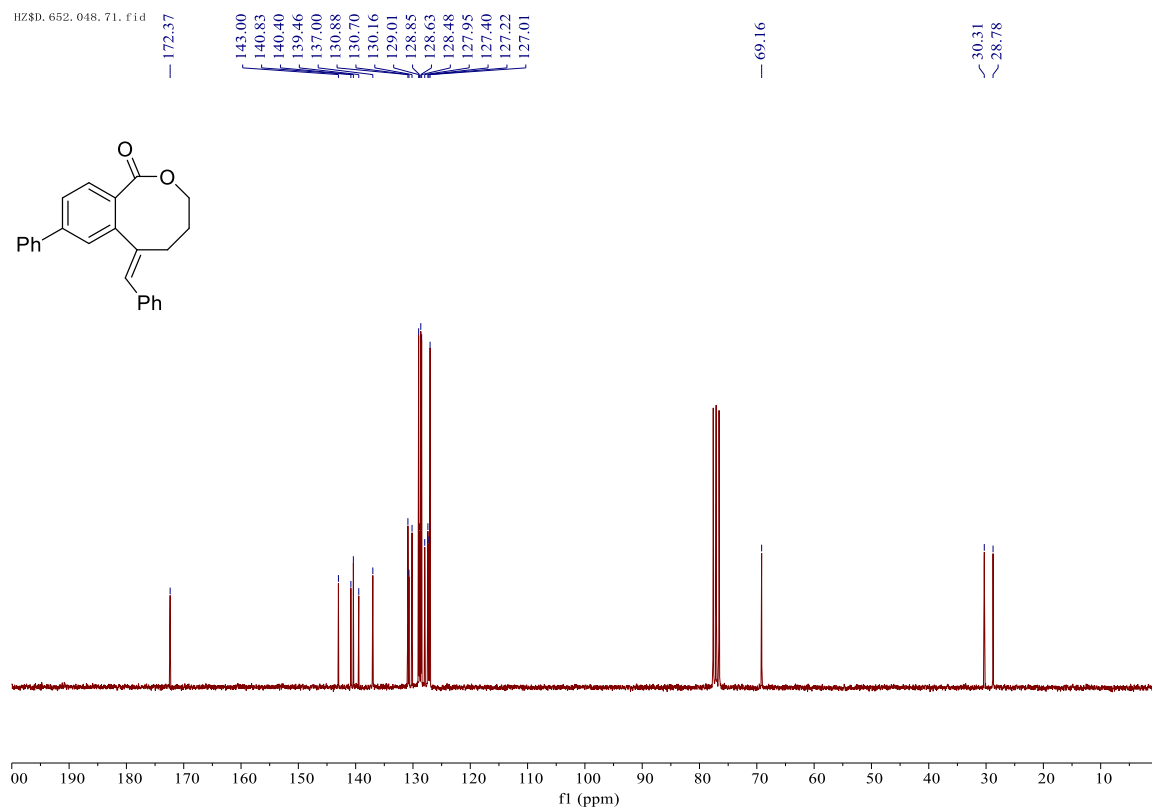

**<sup>1</sup>H NMR (250 MHz, CDCl<sub>3</sub>) and <sup>13</sup>C NMR (63 MHz, CDCl<sub>3</sub>) spectra of product 3ha**

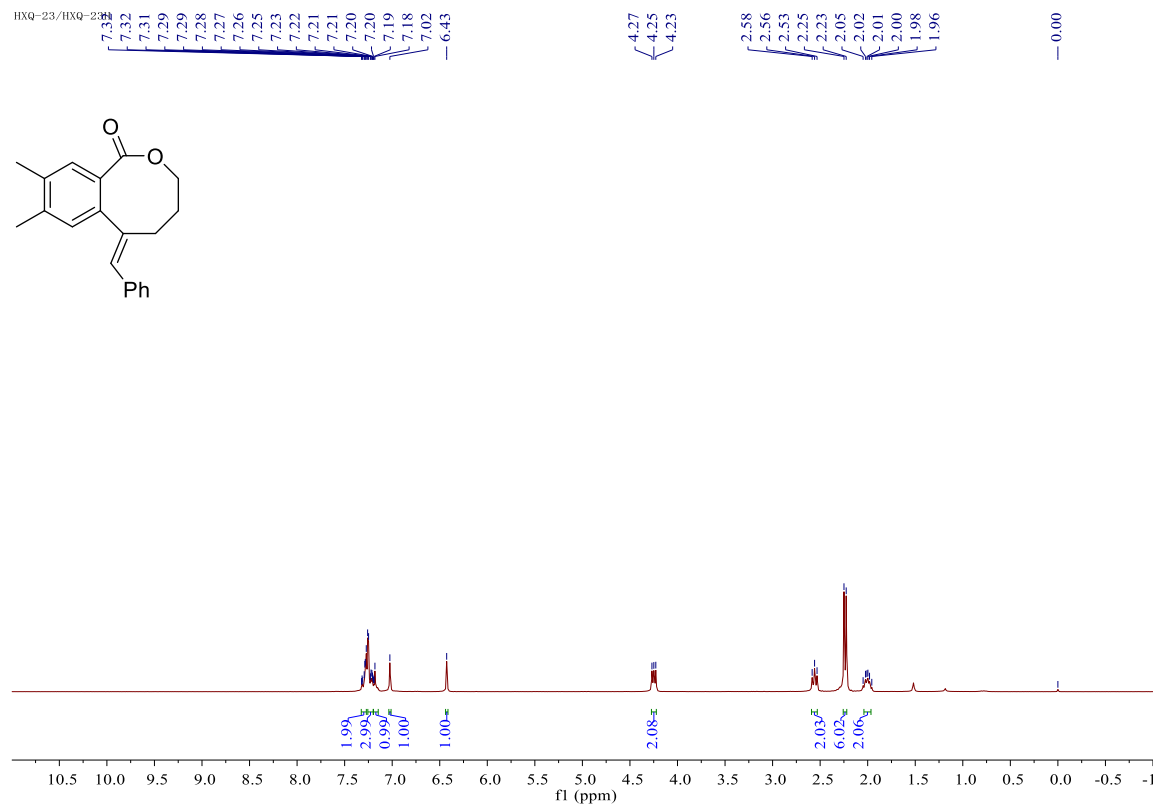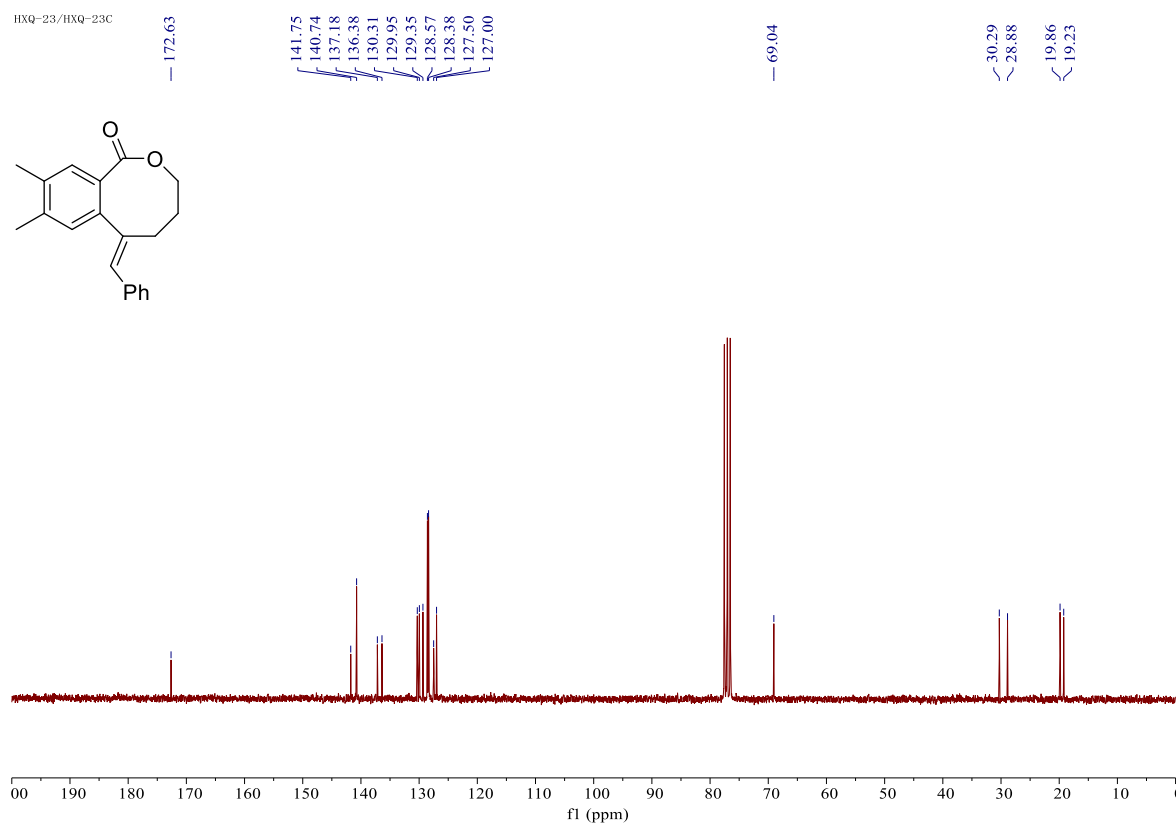

# <sup>1</sup>H NMR (250 MHz, CDCl<sub>3</sub>) and <sup>13</sup>C NMR (63 MHz, CDCl<sub>3</sub>) spectra of product 3ia

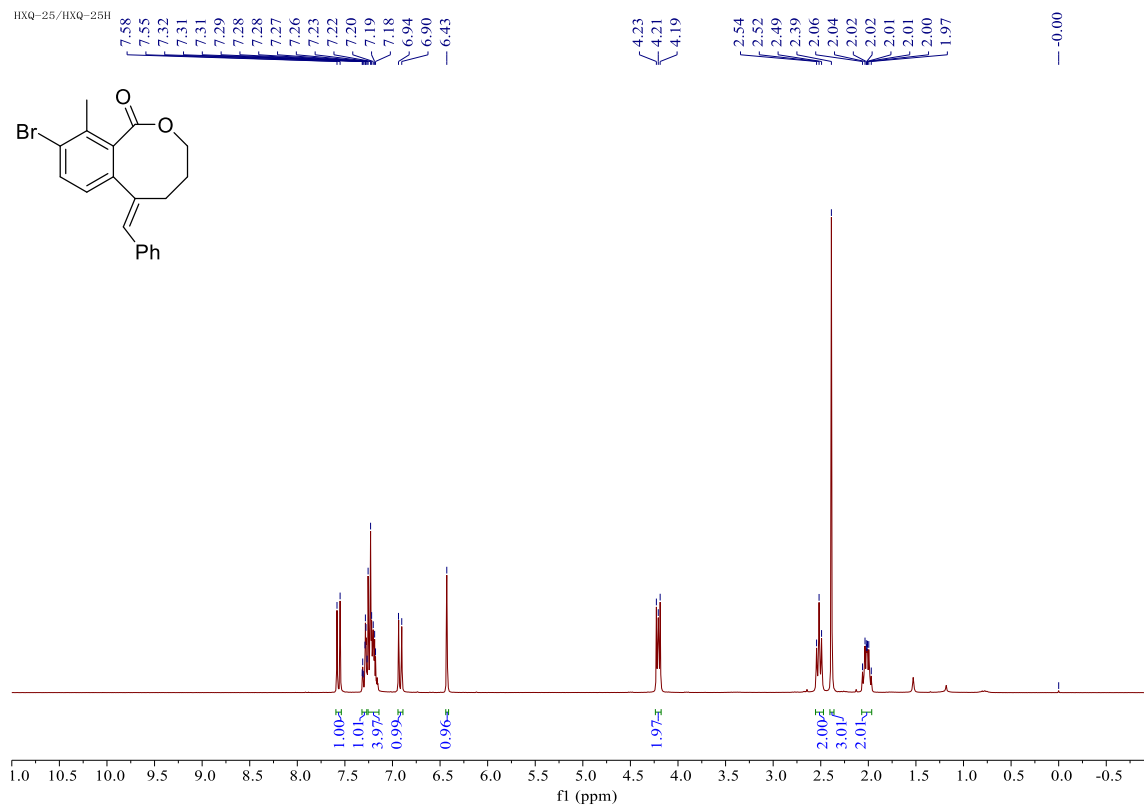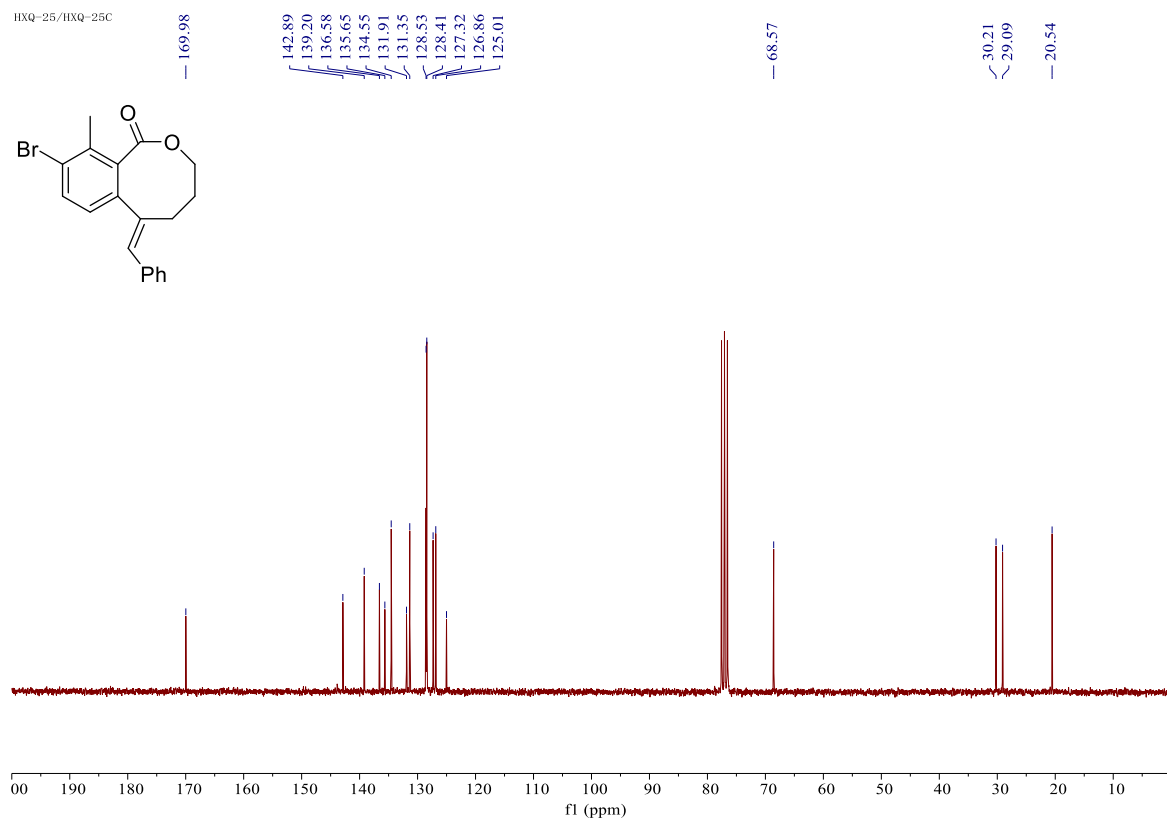

# <sup>1</sup>H NMR (250 MHz, CDCl<sub>3</sub>) and <sup>13</sup>C NMR (63 MHz, CDCl<sub>3</sub>) spectra of product 3ja

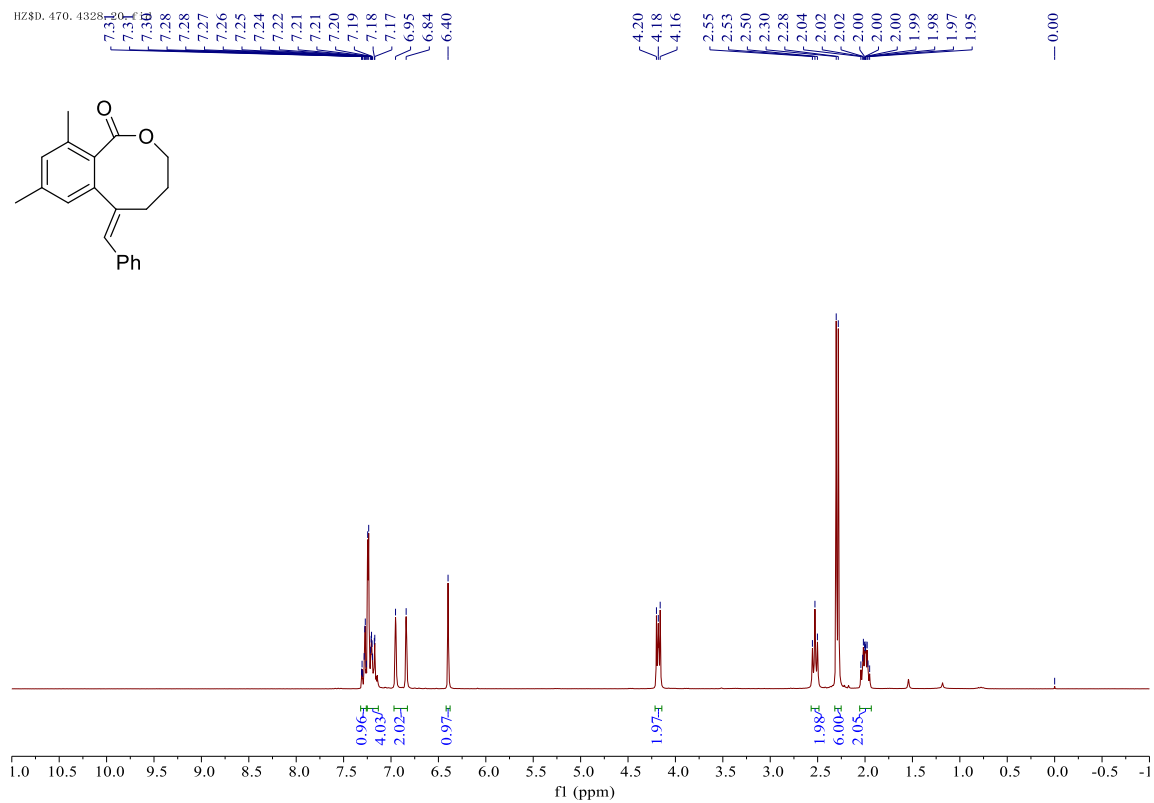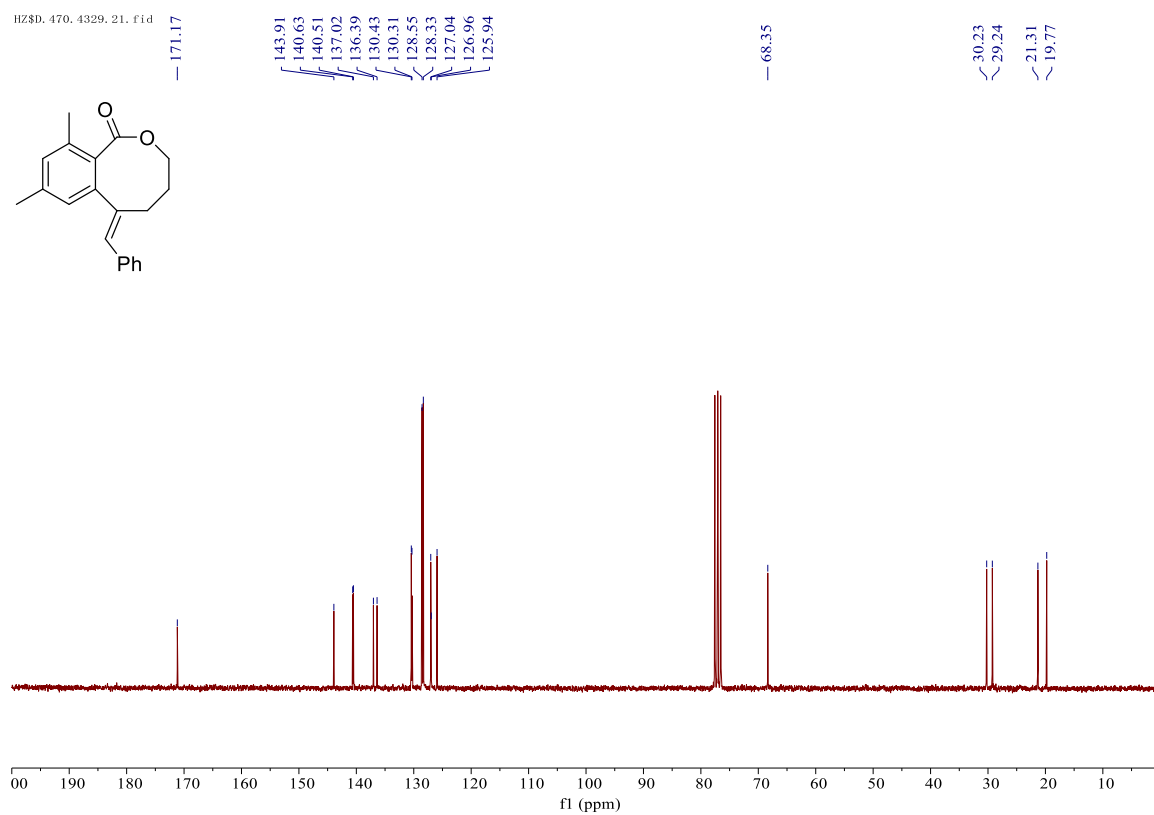



**<sup>1</sup>H NMR (250 MHz, CDCl<sub>3</sub>) and <sup>13</sup>C NMR (63 MHz, CDCl<sub>3</sub>) spectra of product 3ka**

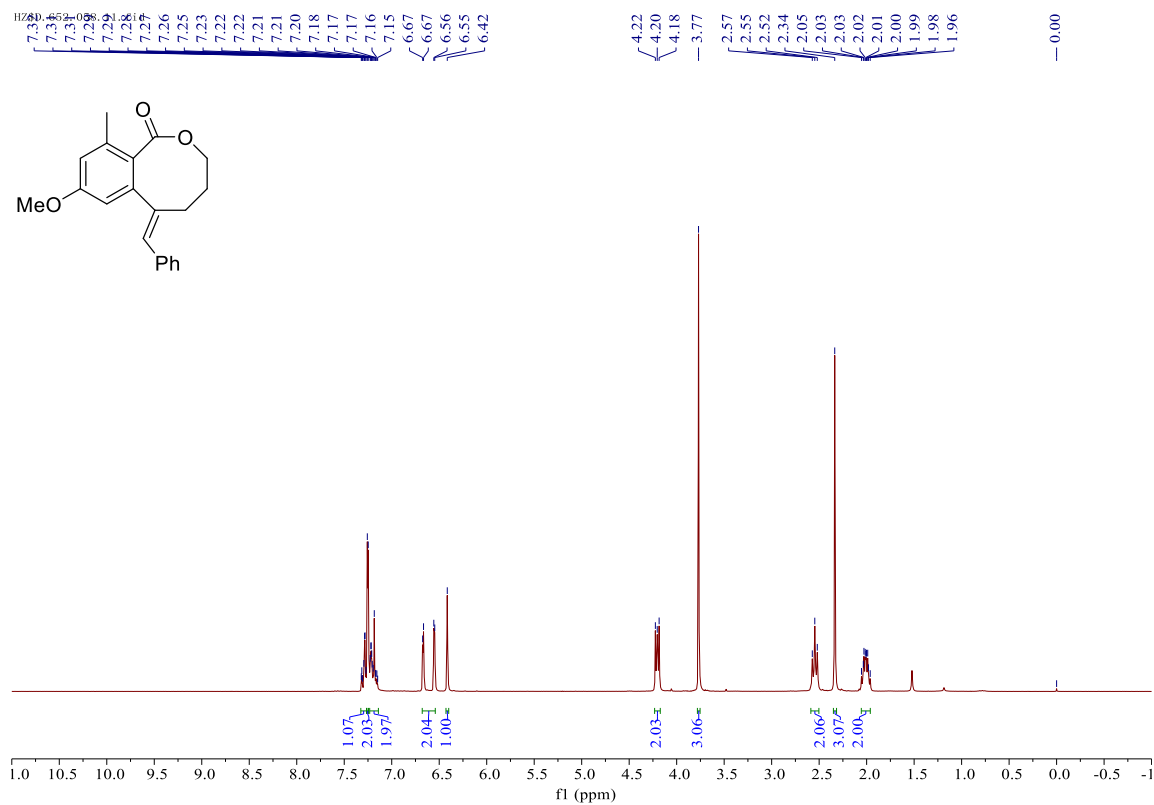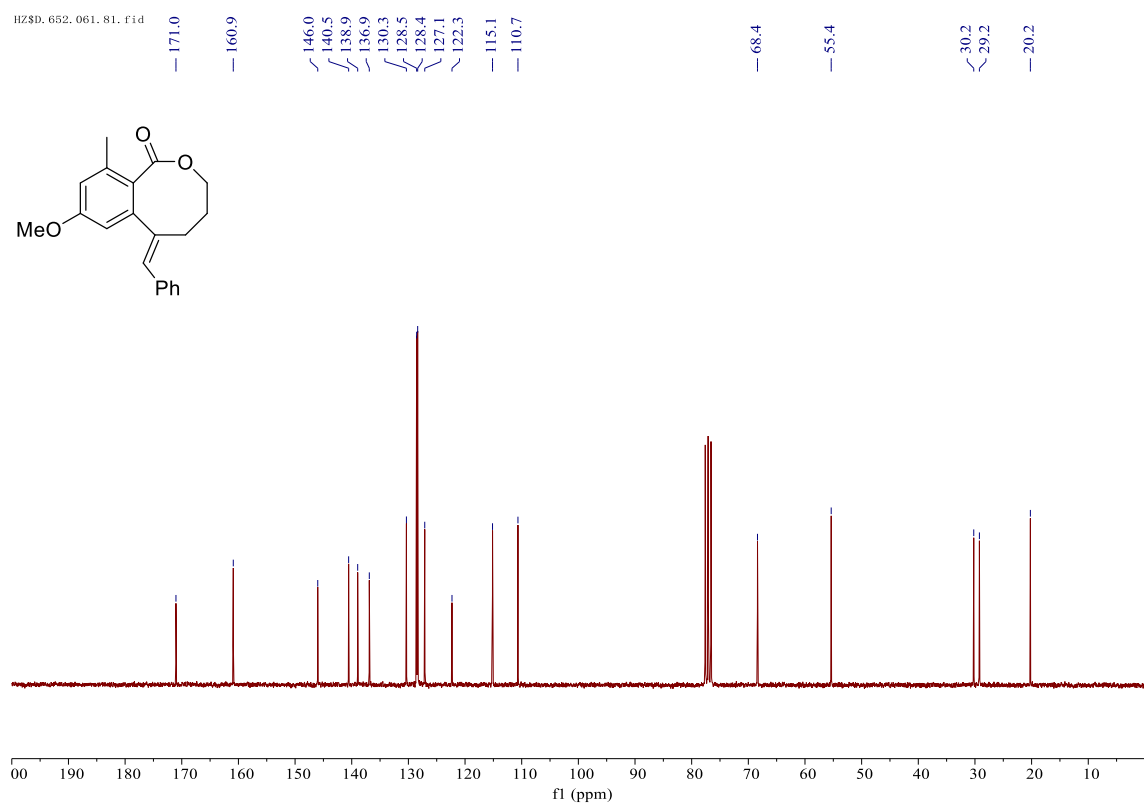

**$^1\text{H}$  NMR (250 MHz,  $\text{CDCl}_3$ ),  $^{13}\text{C}$  NMR (63 MHz,  $\text{CDCl}_3$ ) and  $^{19}\text{F}$  NMR (376 MHz,  $\text{CDCl}_3$ ) spectra of product 3la**

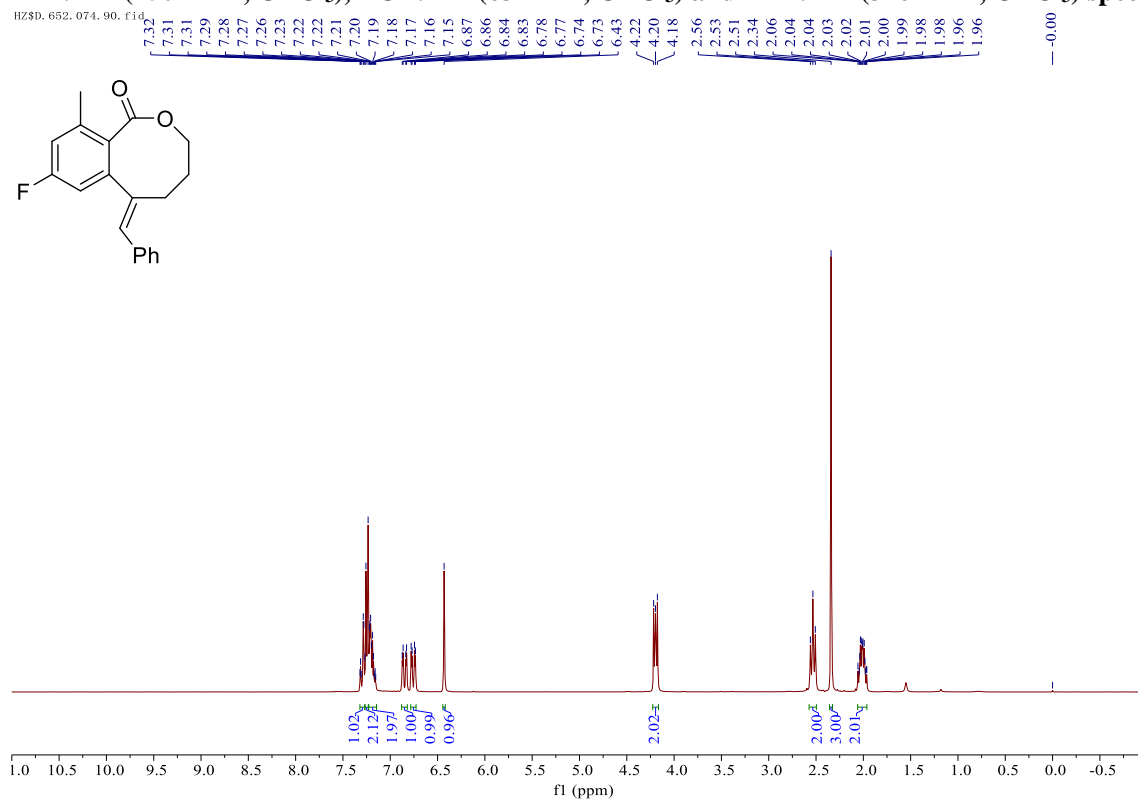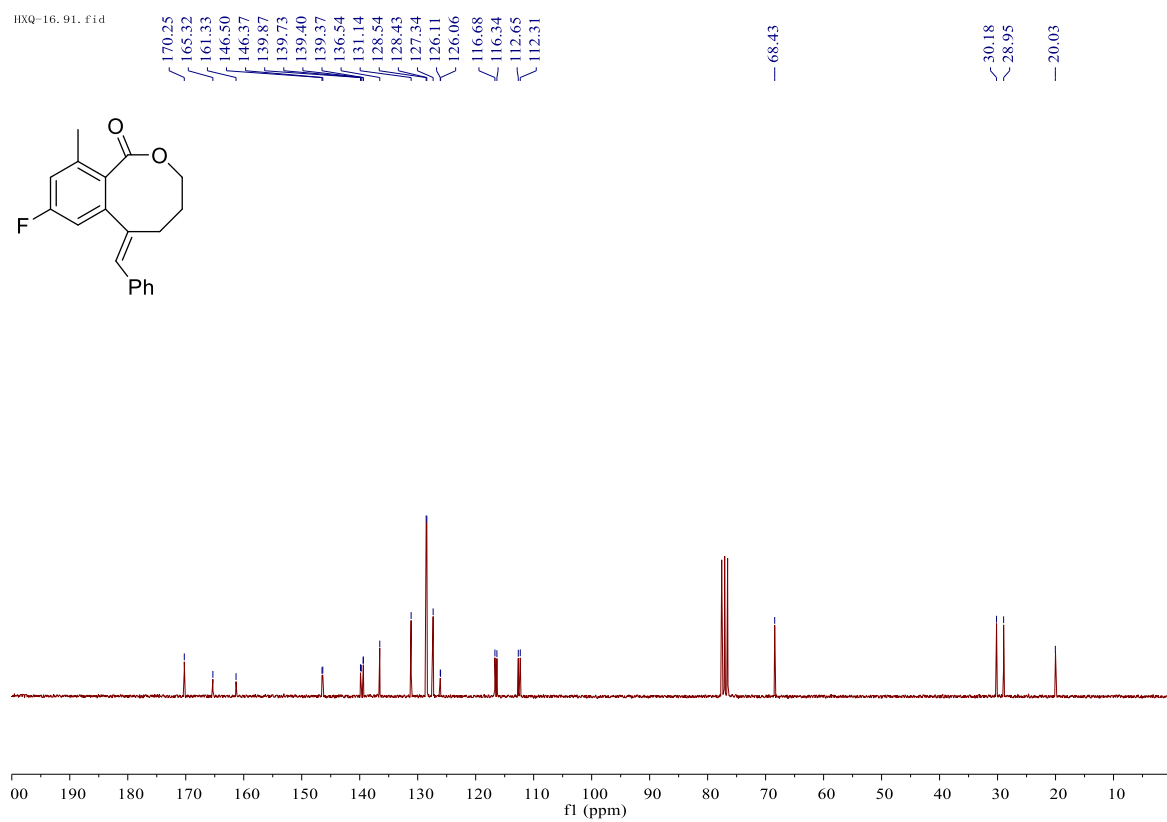

HXQ-16/HXQ-16F  
F19  
20. 11. 26 HXQ-16

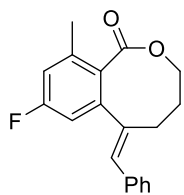

-109.84

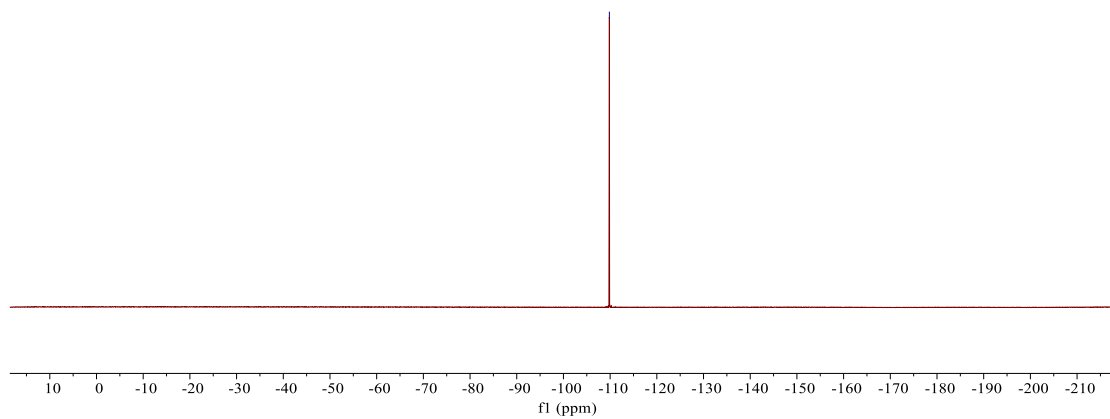

# <sup>1</sup>H NMR (250 MHz, CDCl<sub>3</sub>) and <sup>13</sup>C NMR (63 MHz, CDCl<sub>3</sub>) spectra of product 3ma

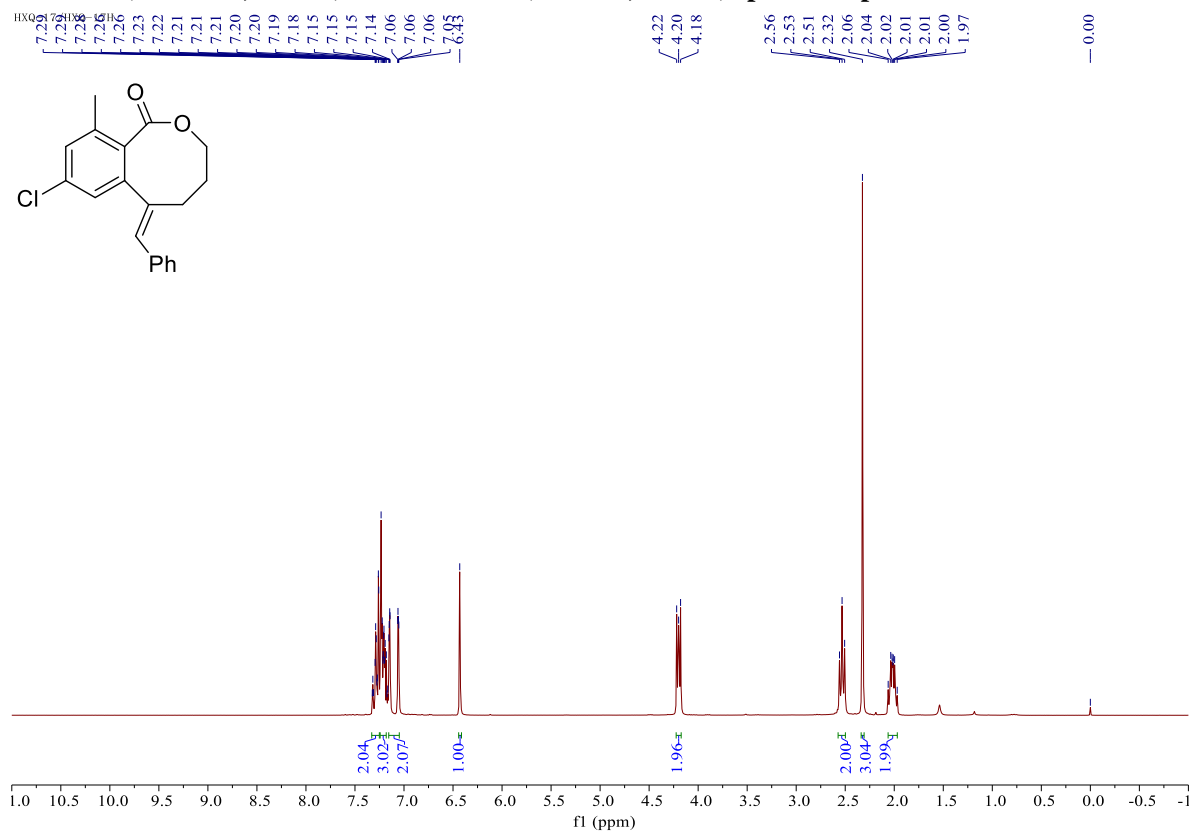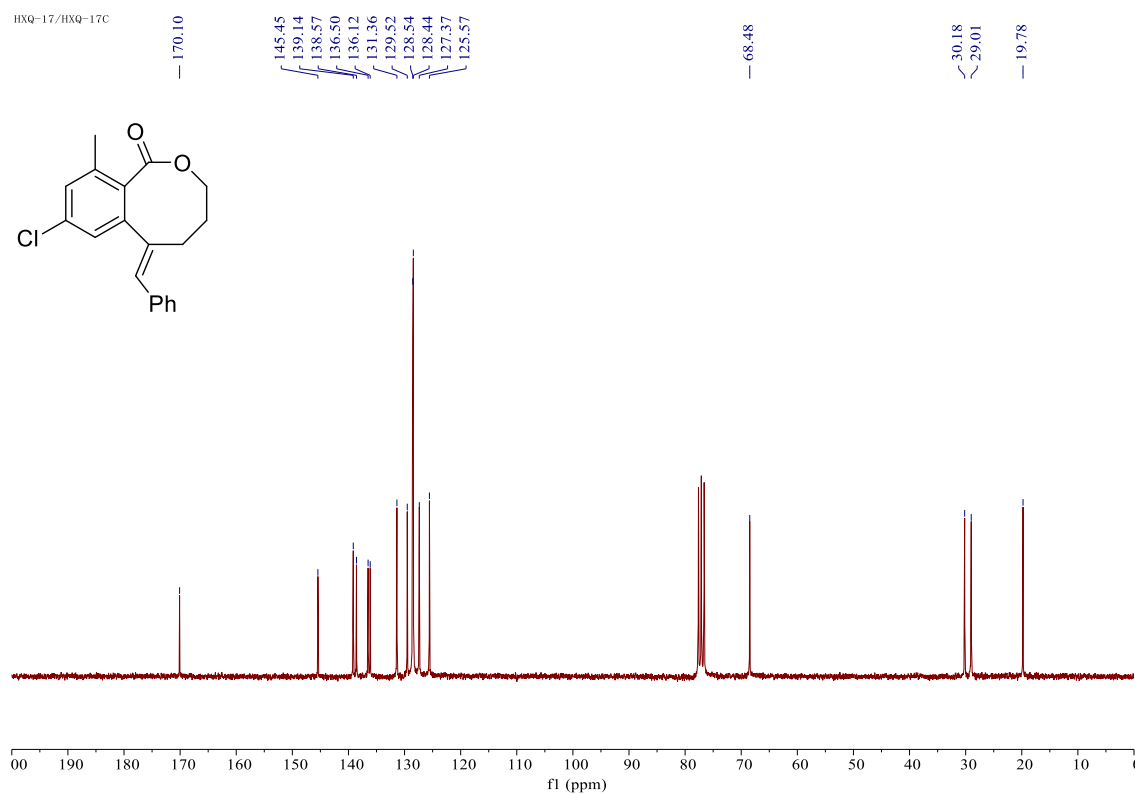

# $^1\text{H}$ NMR (250 MHz, $\text{CDCl}_3$ ) and $^{13}\text{C}$ NMR (63 MHz, $\text{CDCl}_3$ ) spectra of product 3na

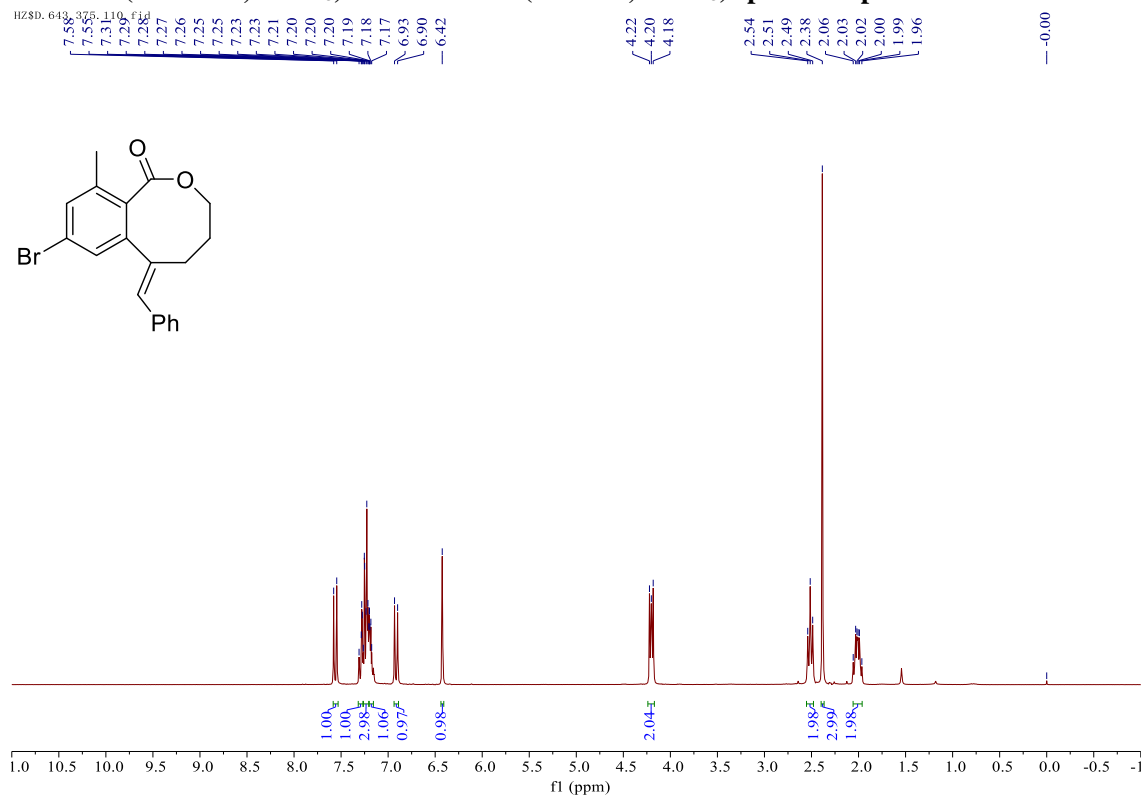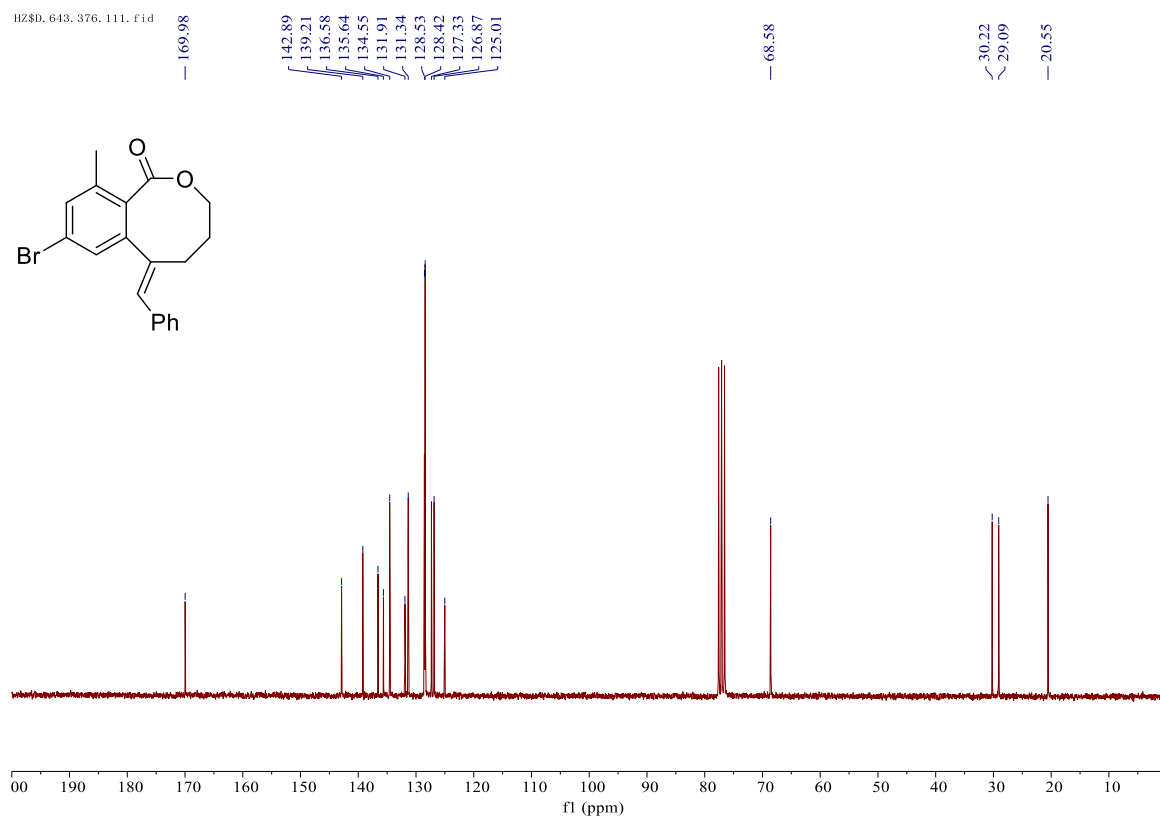

# <sup>1</sup>H NMR (250 MHz, CDCl<sub>3</sub>) and <sup>13</sup>C NMR (63 MHz, CDCl<sub>3</sub>) spectra of product 30a

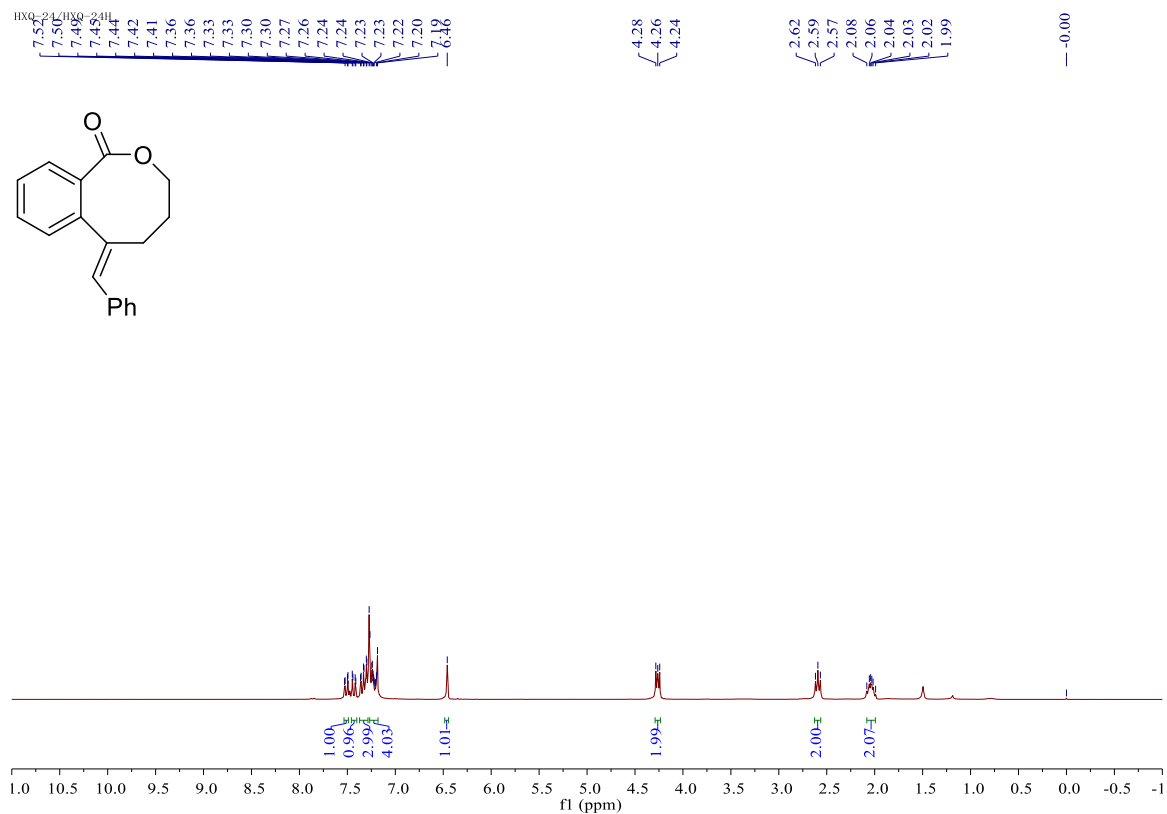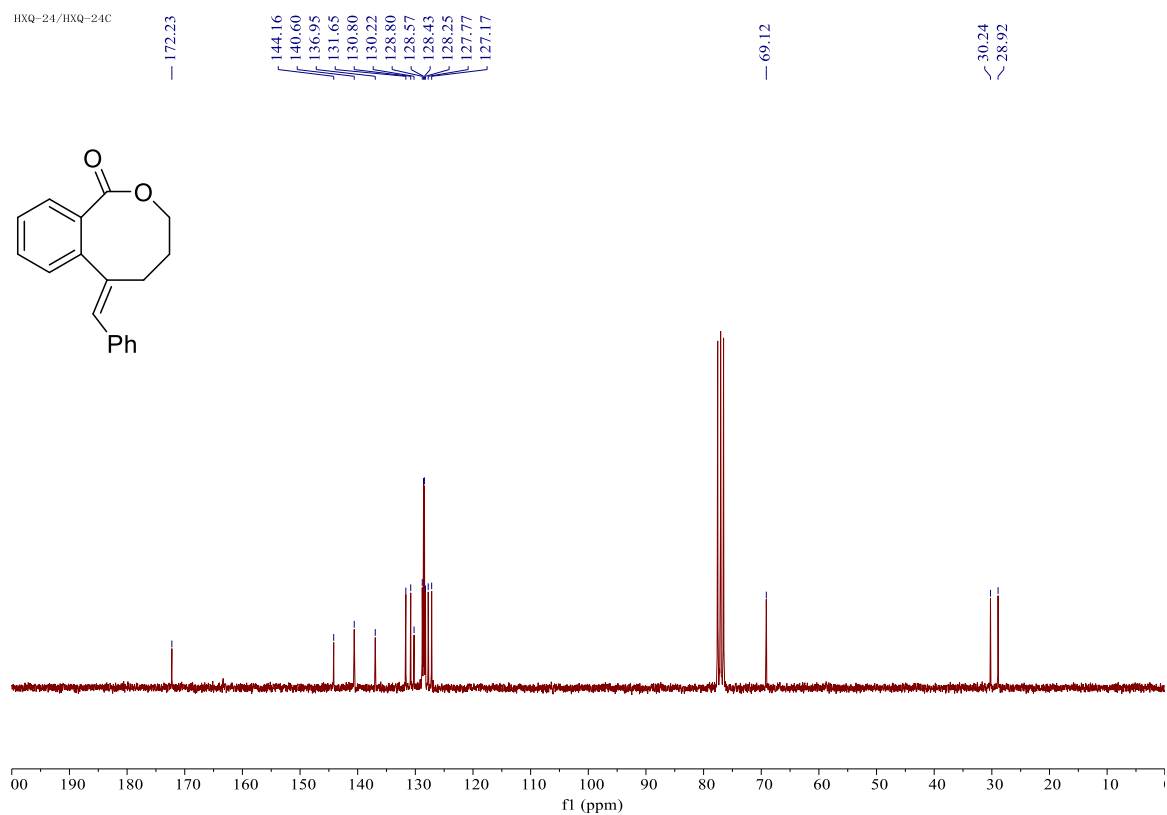

# $^1\text{H}$ NMR (250 MHz, $\text{CDCl}_3$ ) and $^{13}\text{C}$ NMR (63 MHz, $\text{CDCl}_3$ ) spectra of product 3pa

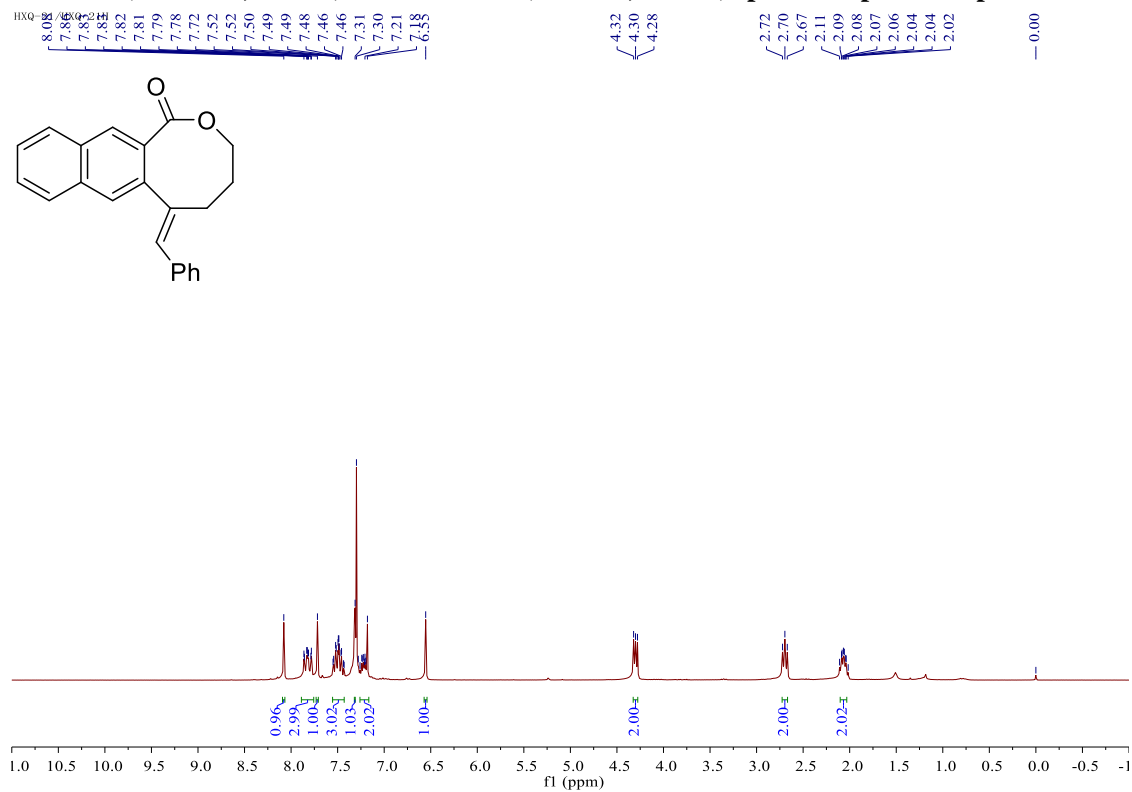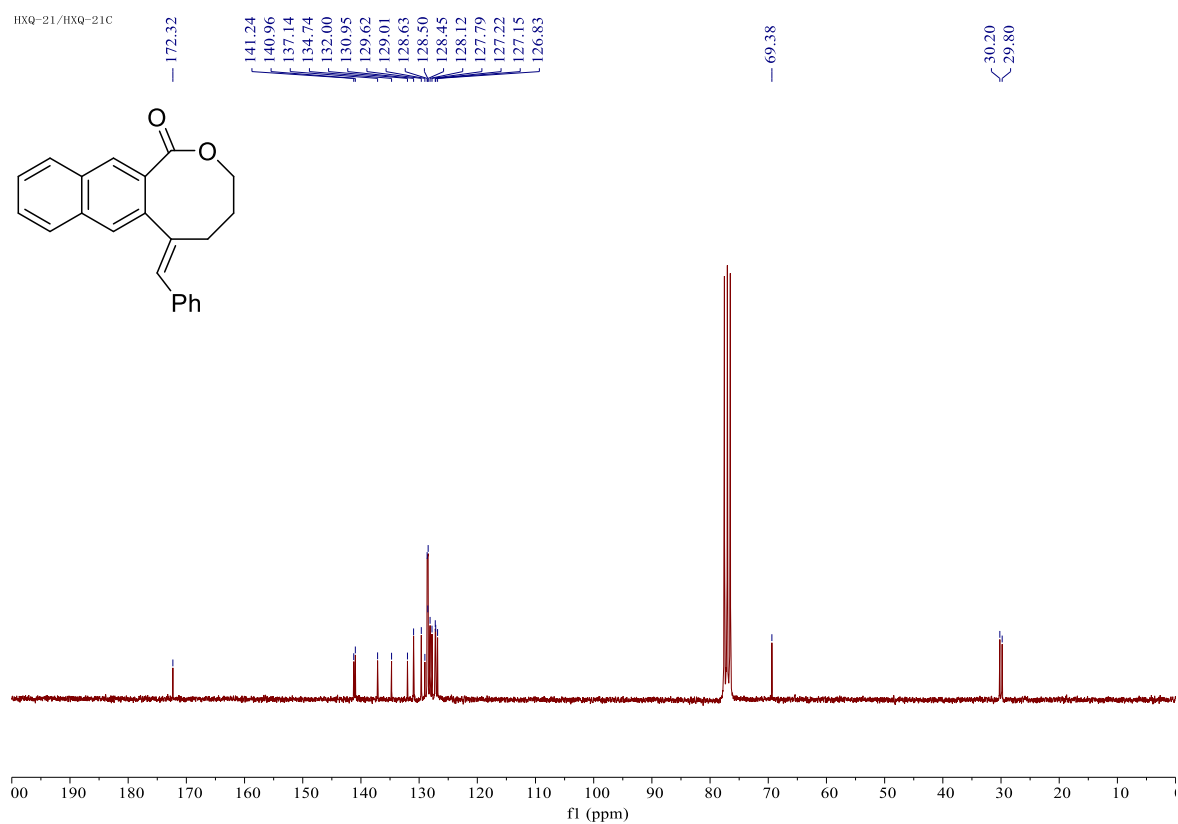

**<sup>1</sup>H NMR (250 MHz, CDCl<sub>3</sub>) and <sup>13</sup>C NMR (63 MHz, CDCl<sub>3</sub>) spectra of product 3qa**

8.028, 8.016, 8.007, 8.01, 7.991, 7.985, 7.97, 7.97, 7.92, 7.88, 7.84, 7.84, 7.83, 7.81, 7.80, 7.56, 7.55, 7.53, 7.52, 7.52, 7.51, 7.51, 7.50, 7.50, 7.49, 7.48, 7.47, 7.47, 7.45, 7.35, 7.34, 7.32, 7.32, 7.32, 7.31, 7.31, 7.30, 7.29, 7.27, 7.25, 7.24, 7.23, 7.22, 7.21, 7.20, 7.18, 6.55, 4.24, 4.22, 4.20, 2.65, 2.63, 2.60, 2.12, 2.11, 2.10, 2.09, 2.08, 2.07, 2.07, 2.06

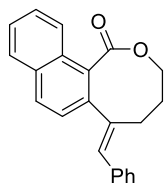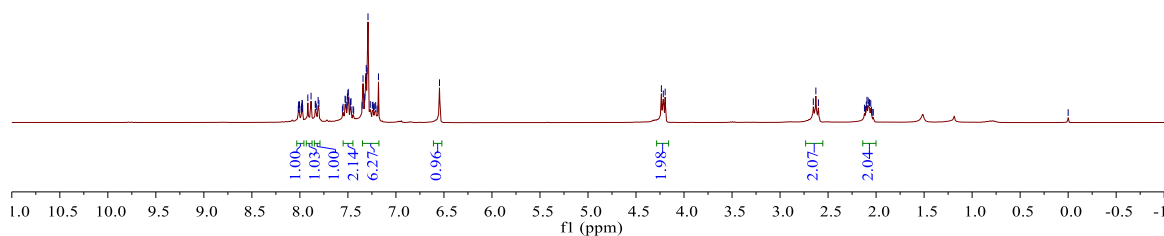

HZSD. 946. 5011. 12. Fid

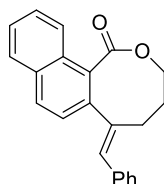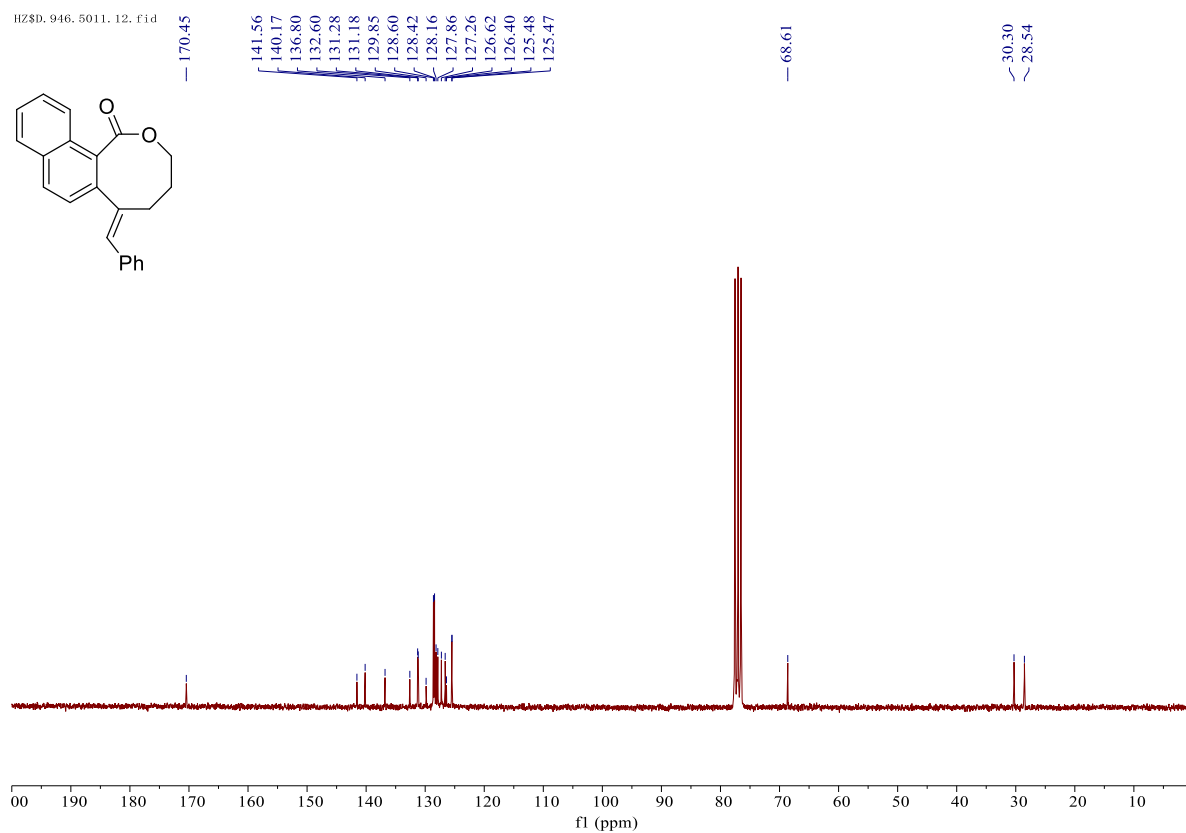



# <sup>1</sup>H NMR (250 MHz, CDCl<sub>3</sub>) and <sup>13</sup>C NMR (63 MHz, CDCl<sub>3</sub>) spectra of product 3ra

HXQ-22/HXQ-22H

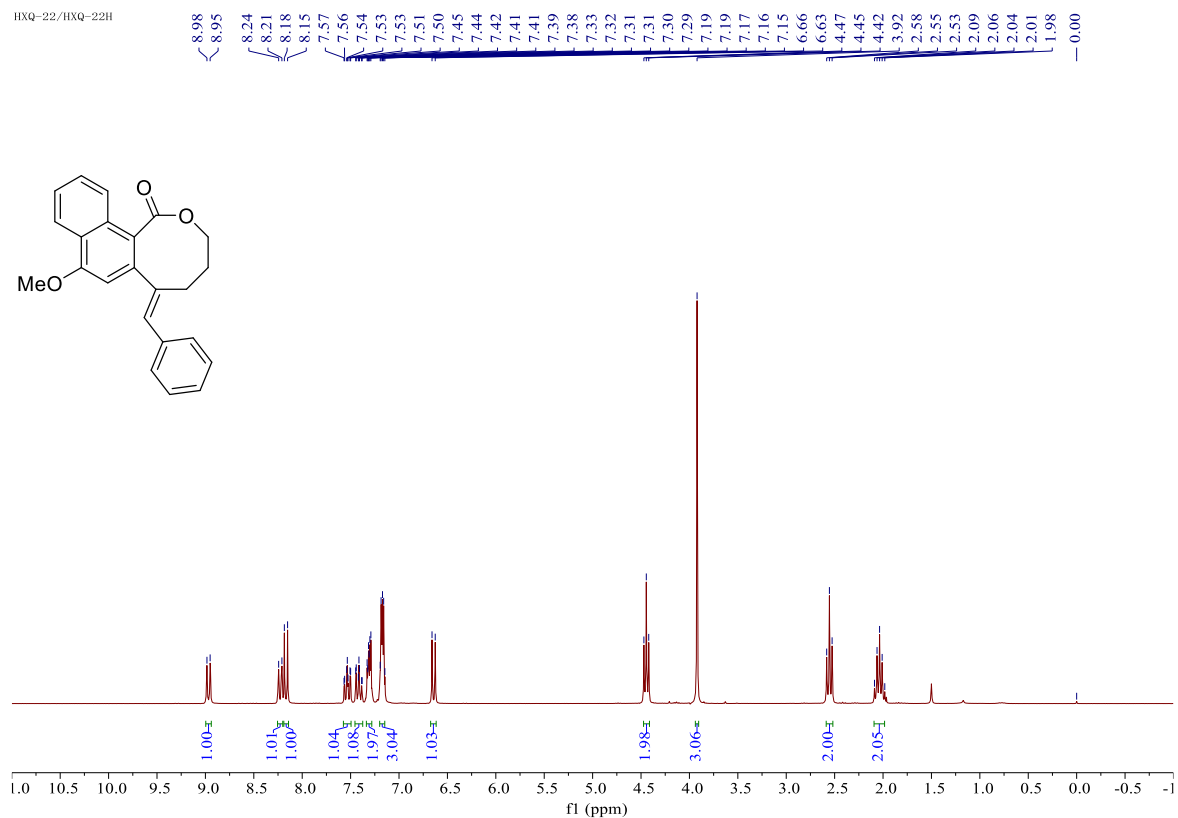

HXQ-22/HXQ-22C

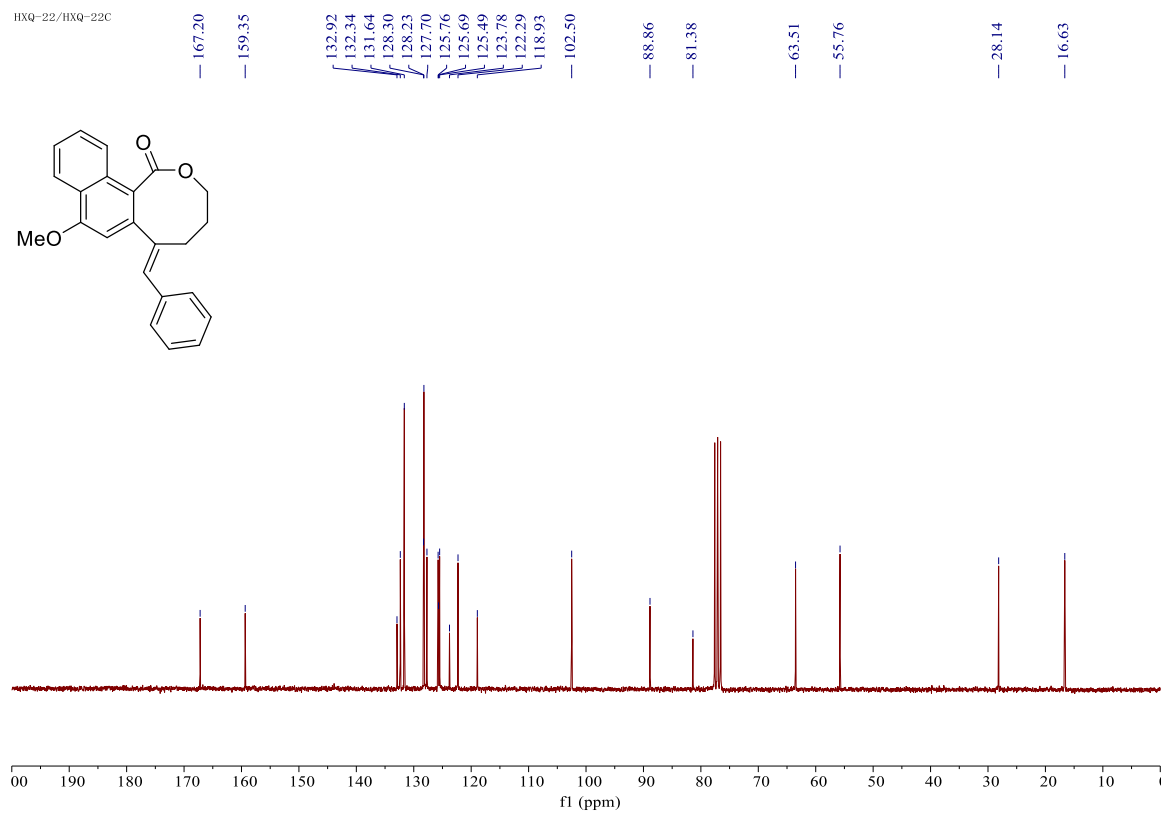

# <sup>1</sup>H NMR (250 MHz, CDCl<sub>3</sub>) and <sup>13</sup>C NMR (63 MHz, CDCl<sub>3</sub>) spectra of product 3sa

HXQ-28/HXQ-28H

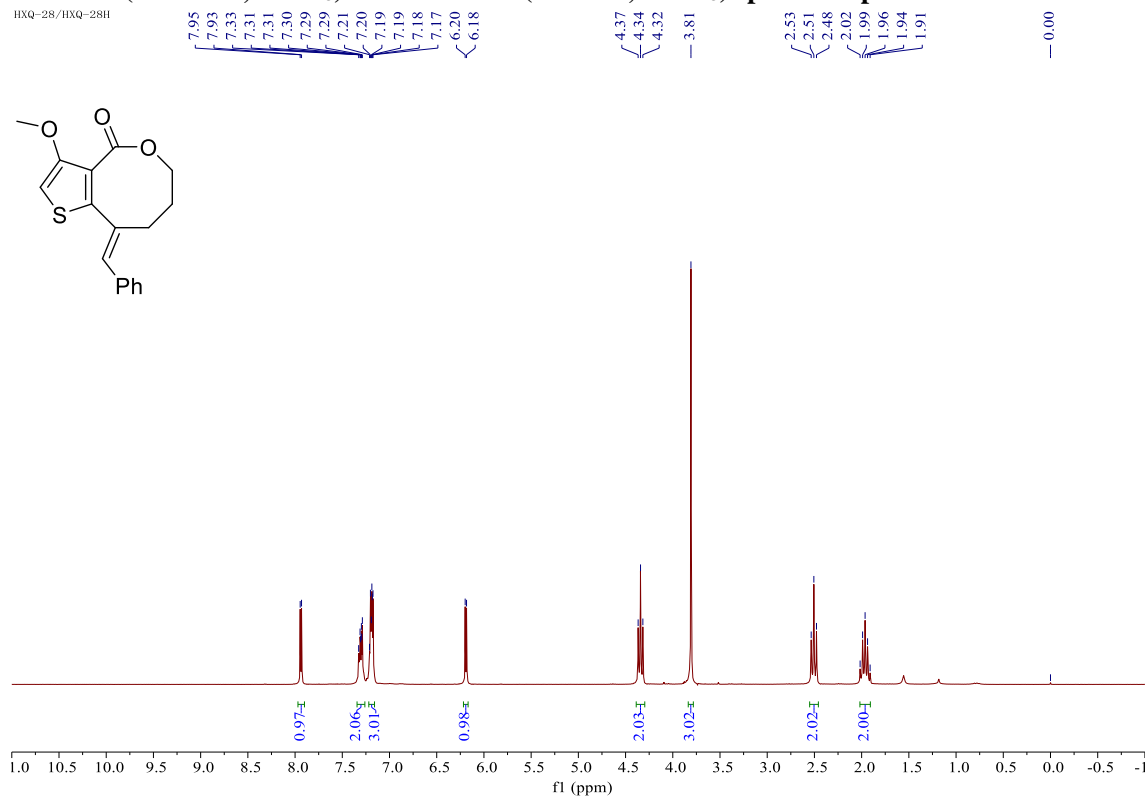

HXQ-28/HXQ-28C

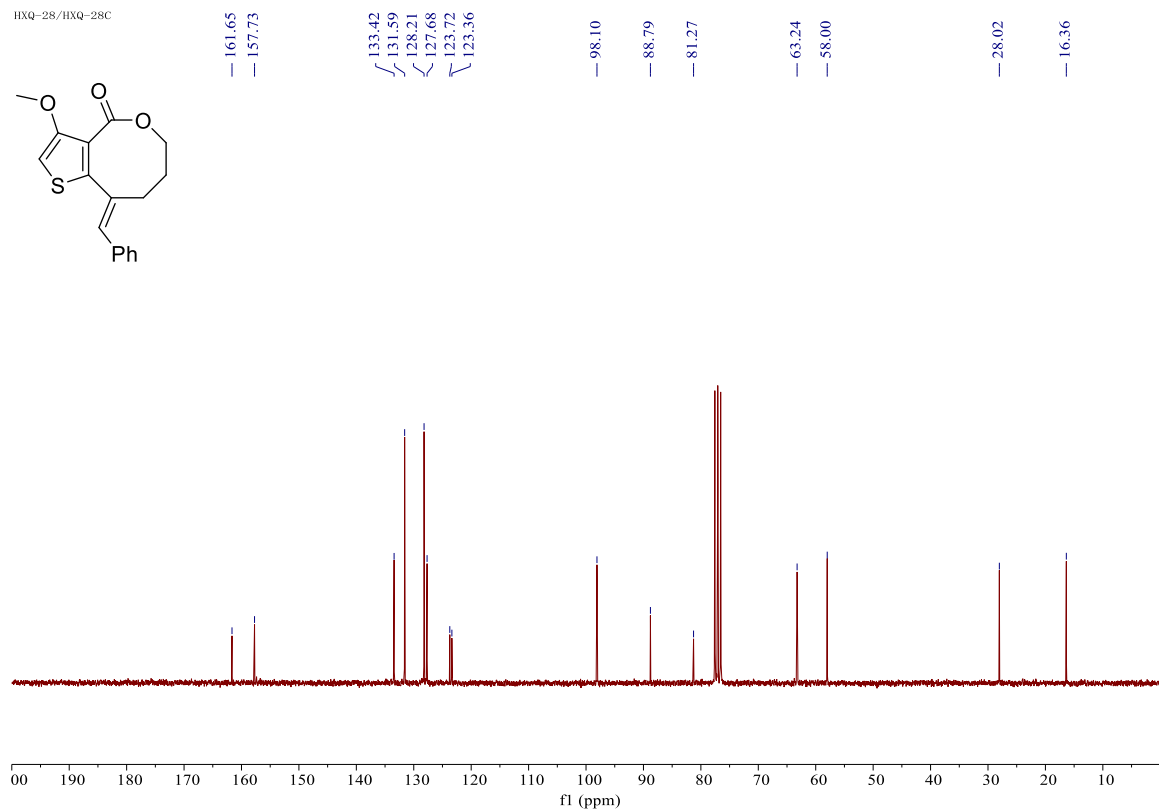

# $^1\text{H}$ NMR (600 MHz, $\text{CDCl}_3$ ) and $^{13}\text{C}$ NMR (150 MHz, $\text{CDCl}_3$ ) spectra of product 3ab

HXQ-61.1.fid

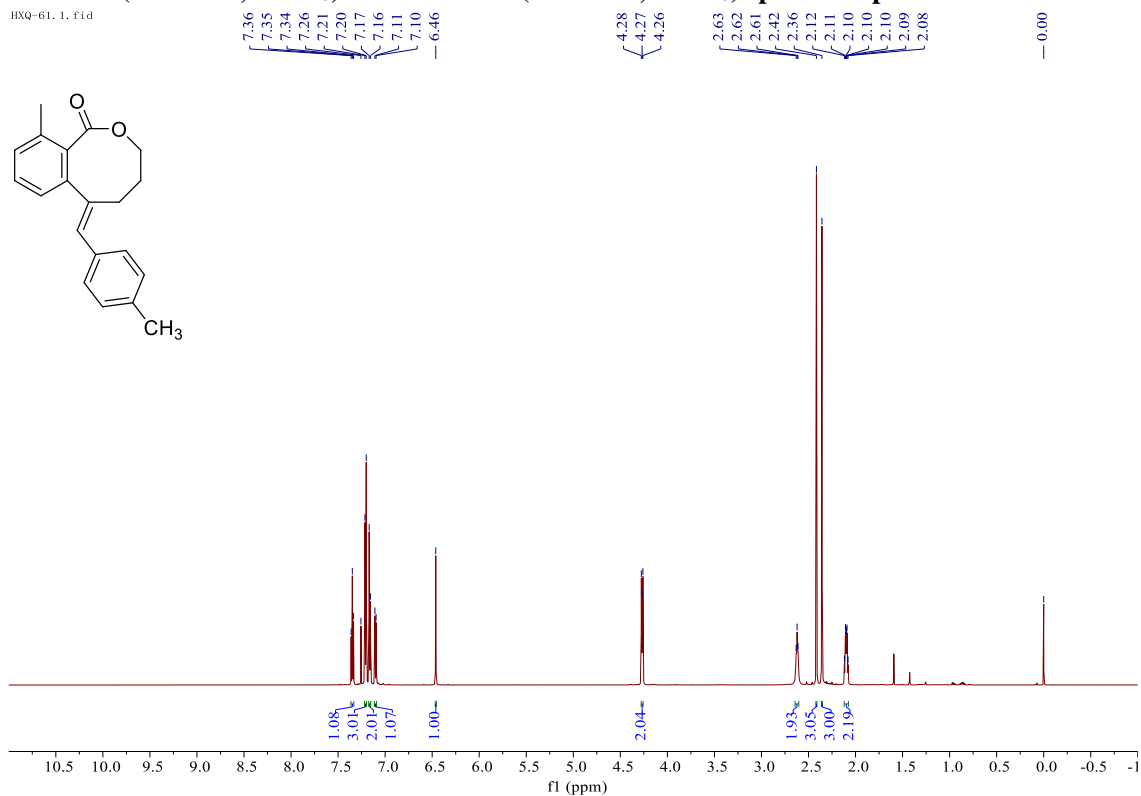

HXQ-61-1.2.fid

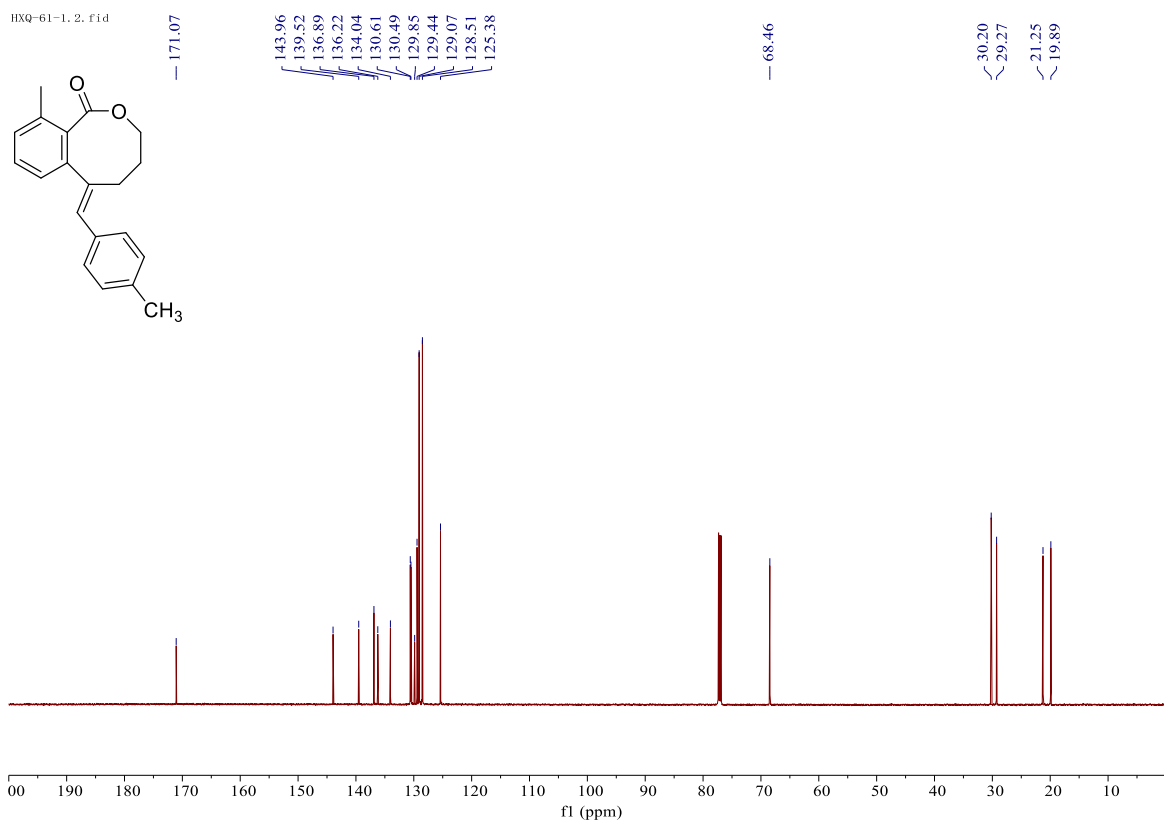

# <sup>1</sup>H NMR (600 MHz, CDCl<sub>3</sub>) and <sup>13</sup>C NMR (150 MHz, CDCl<sub>3</sub>) spectra of product 3ac

HXQ-60-1.1.fid

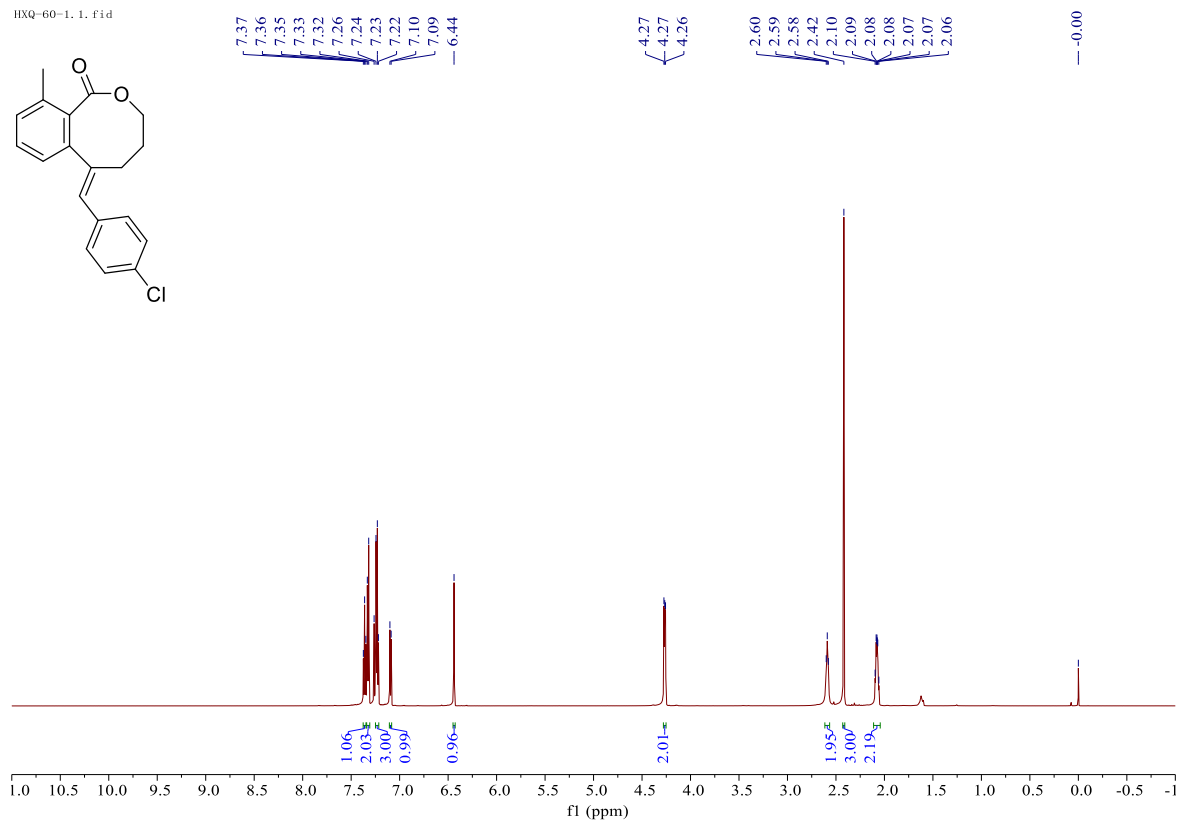

HXQ-60-1.2.fid

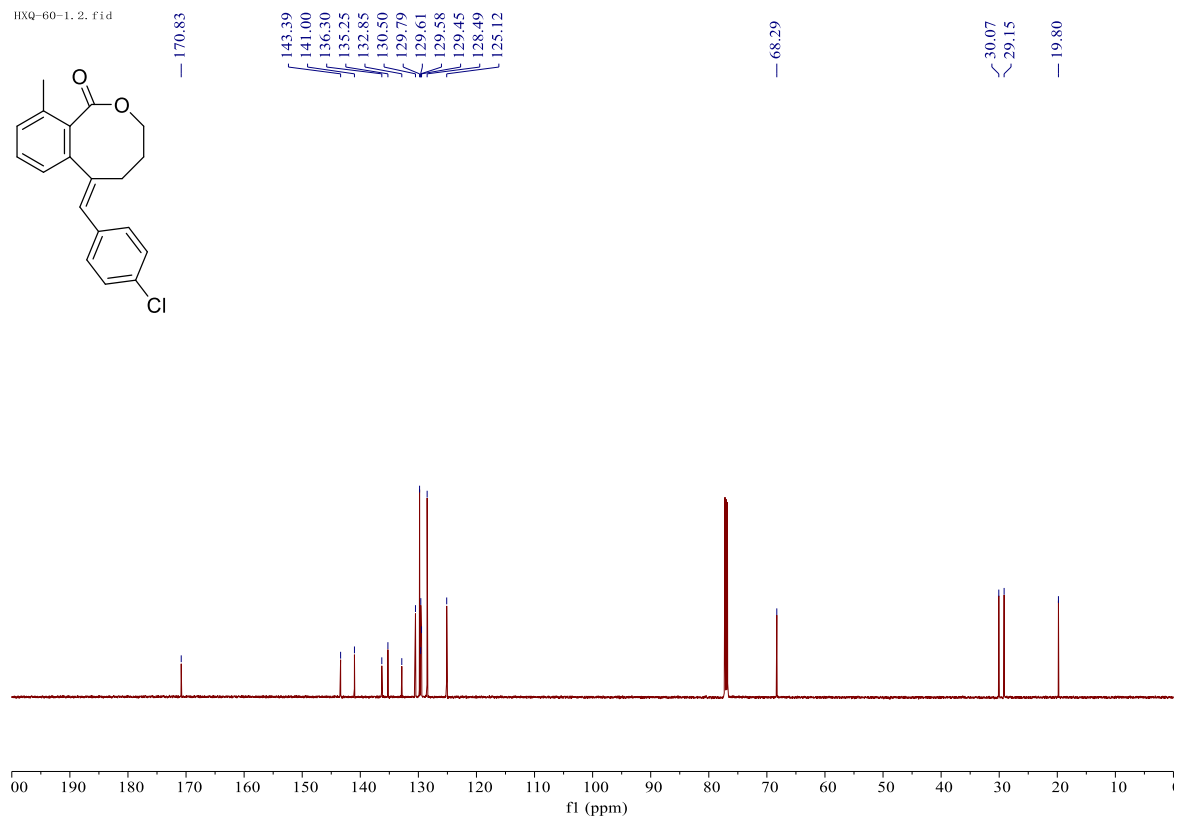

<sup>1</sup>H NMR (600 MHz, CDCl<sub>3</sub>), <sup>13</sup>C NMR (100 MHz, CDCl<sub>3</sub>) and <sup>19</sup>F NMR (376 MHz, CDCl<sub>3</sub>) spectra of product 3ad

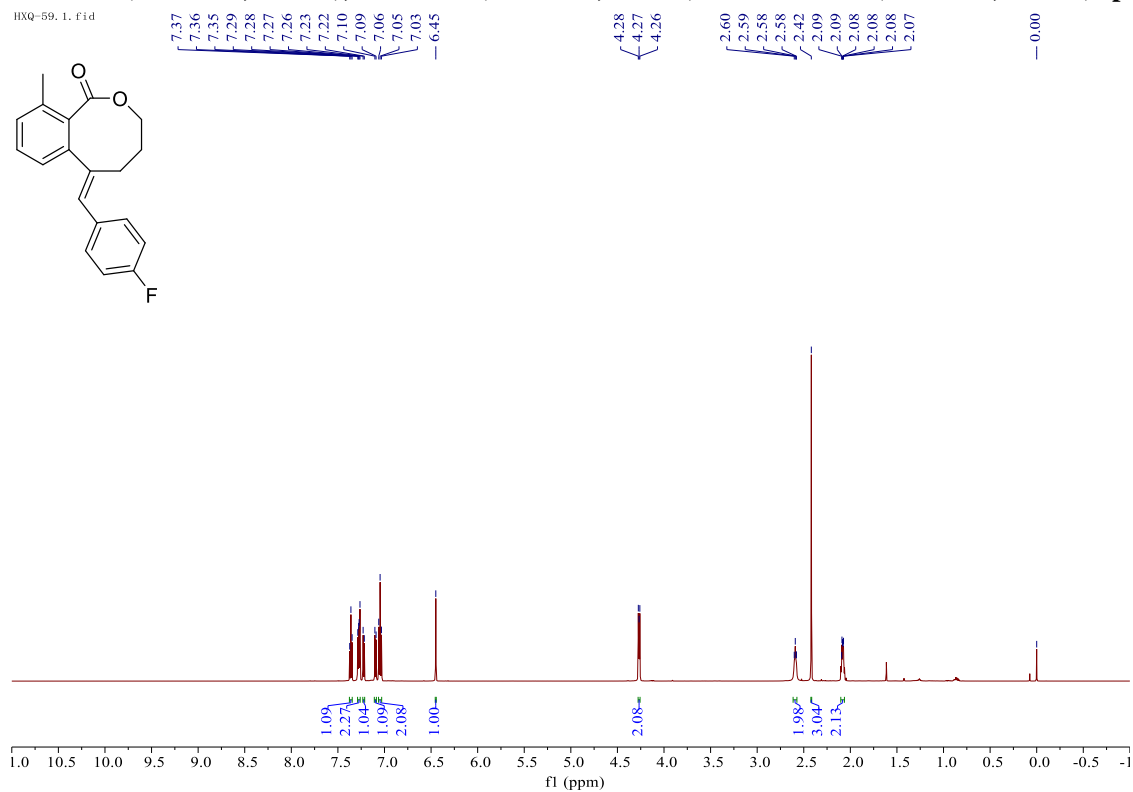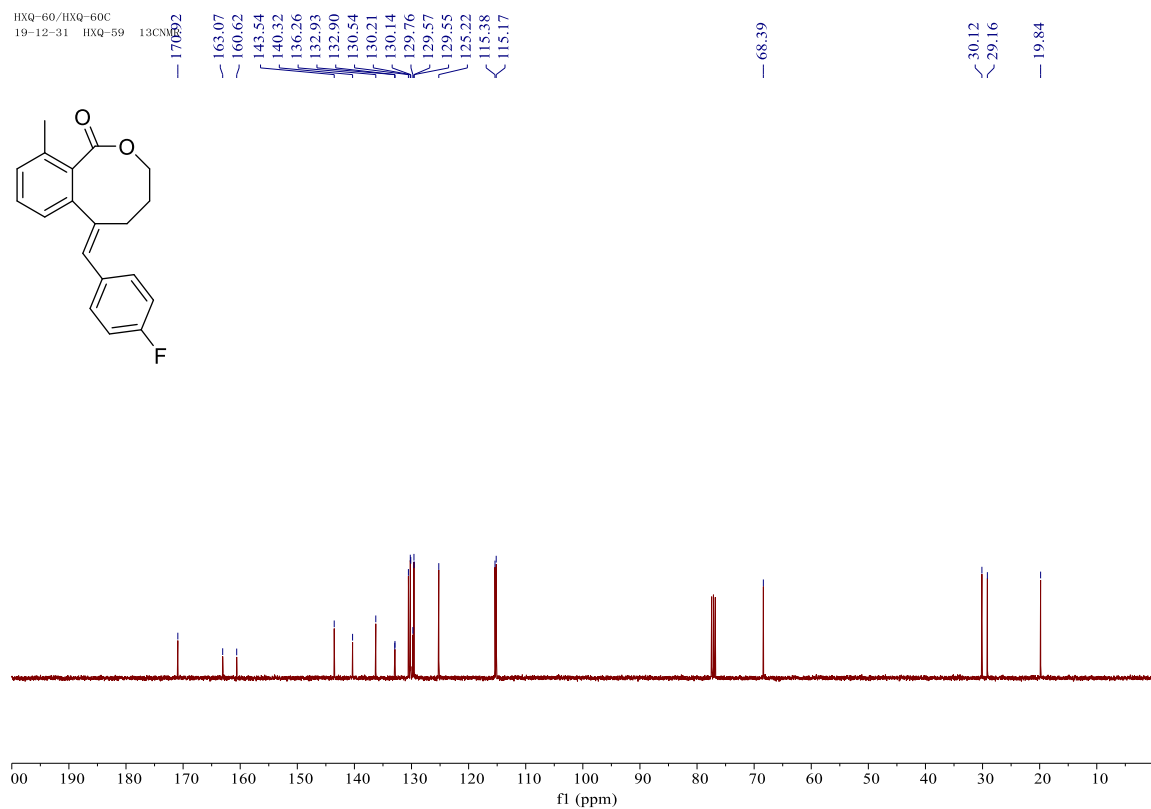

HXQ-59/HXQ-59-F  
20-1-6 HXQ-59 19F NMR

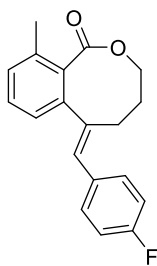

-114.80

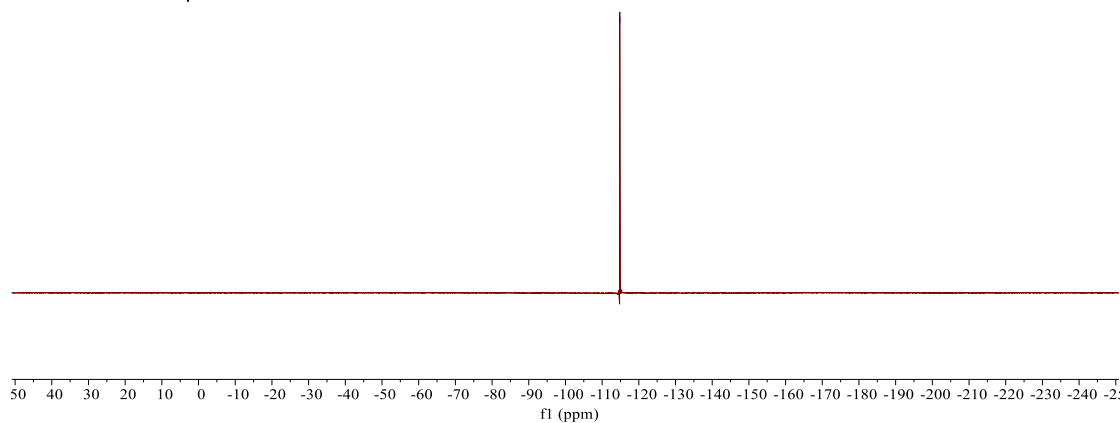

# <sup>1</sup>H NMR (600 MHz, CDCl<sub>3</sub>) and <sup>13</sup>C NMR (150 MHz, CDCl<sub>3</sub>) spectra of product 3ae

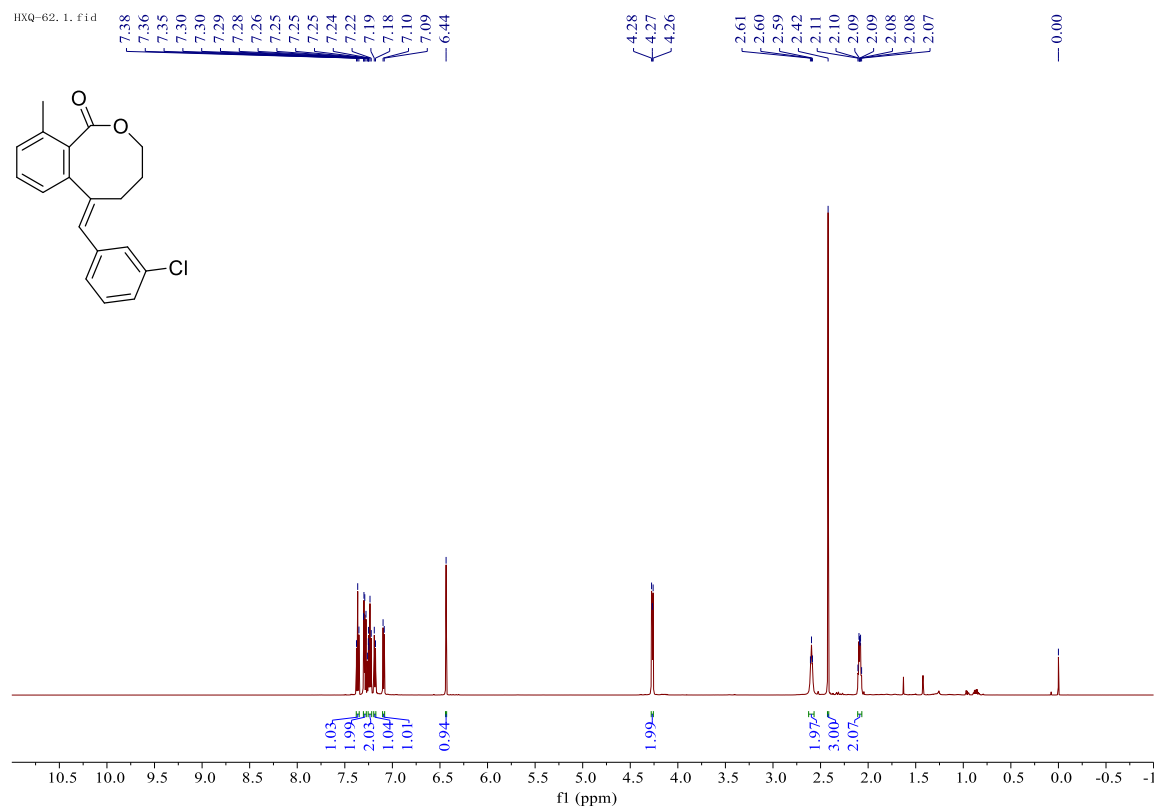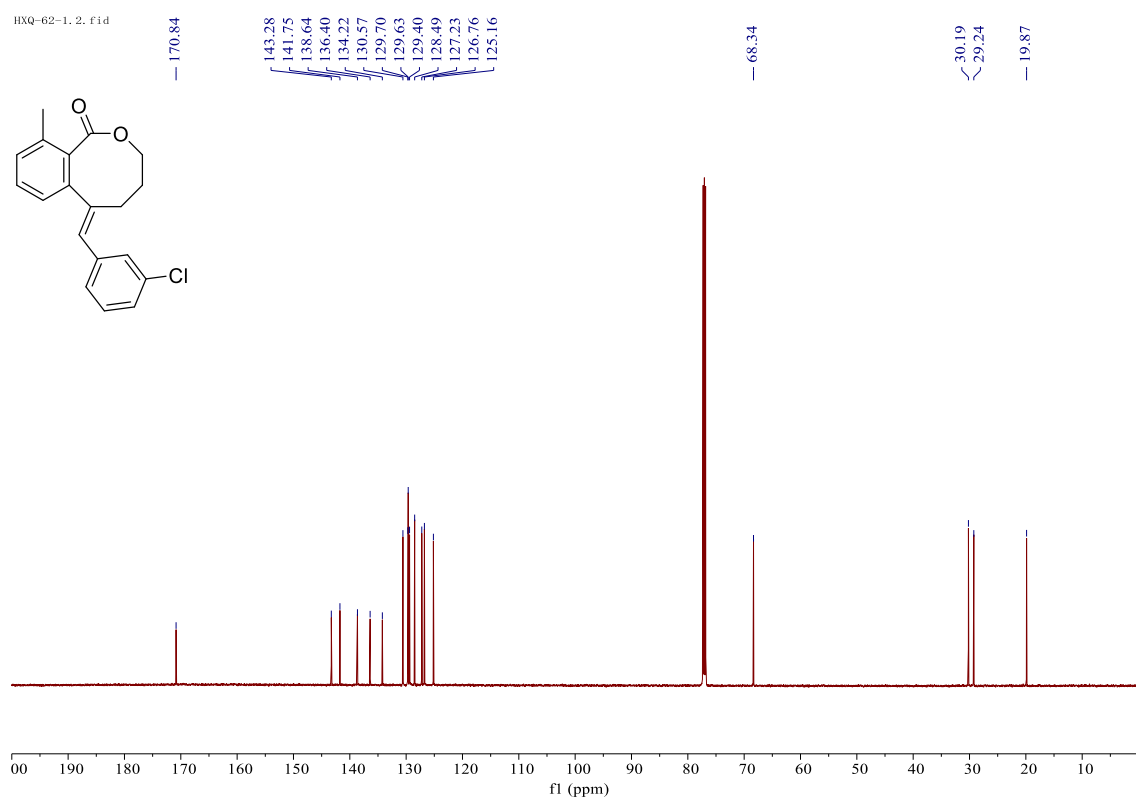

# <sup>1</sup>H NMR (600 MHz, CDCl<sub>3</sub>) and <sup>13</sup>C NMR (150 MHz, CDCl<sub>3</sub>) spectra of product 3af

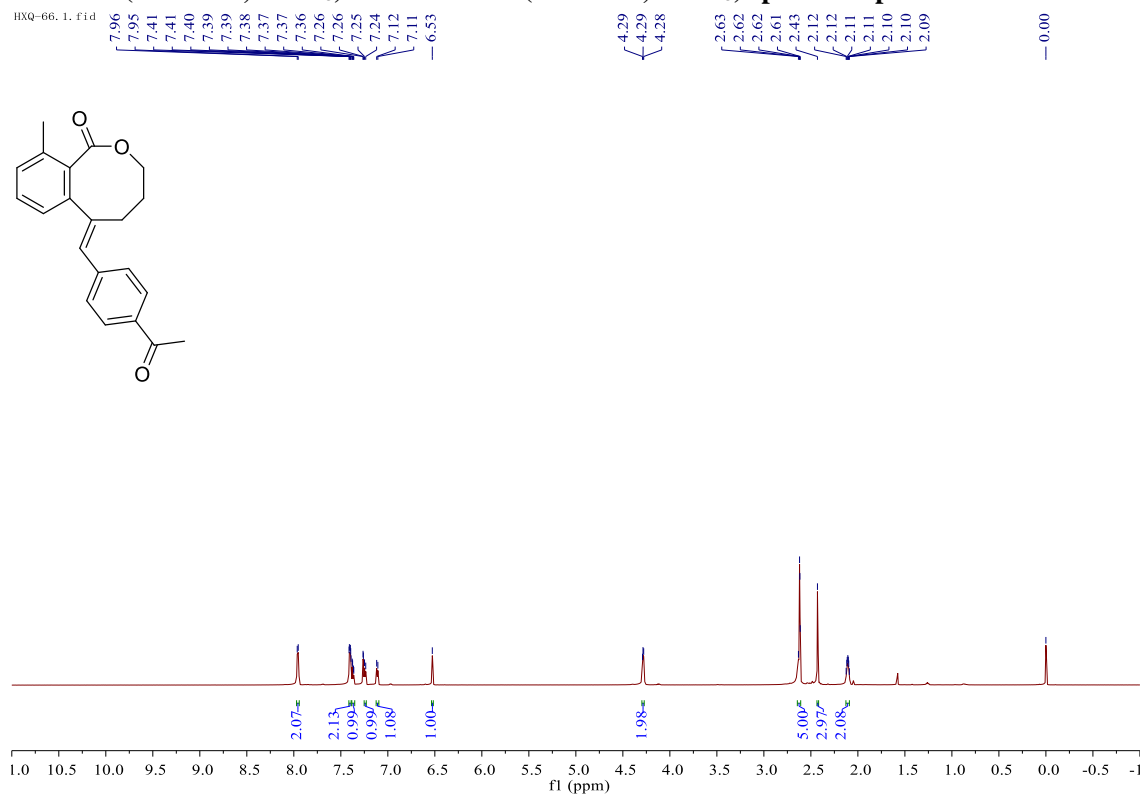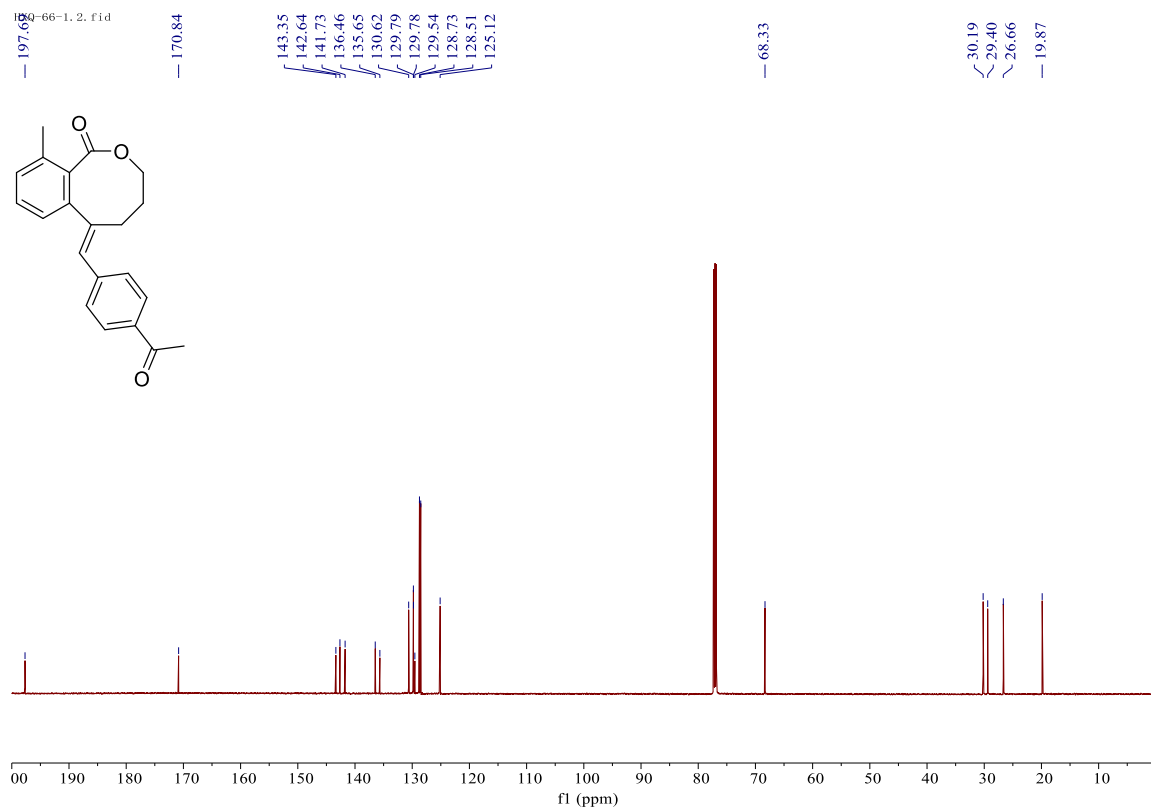



# <sup>1</sup>H NMR (600 MHz, CDCl<sub>3</sub>) and <sup>13</sup>C NMR (150 MHz, CDCl<sub>3</sub>) spectra of product 3ag

HXQ-63-1.1.fid

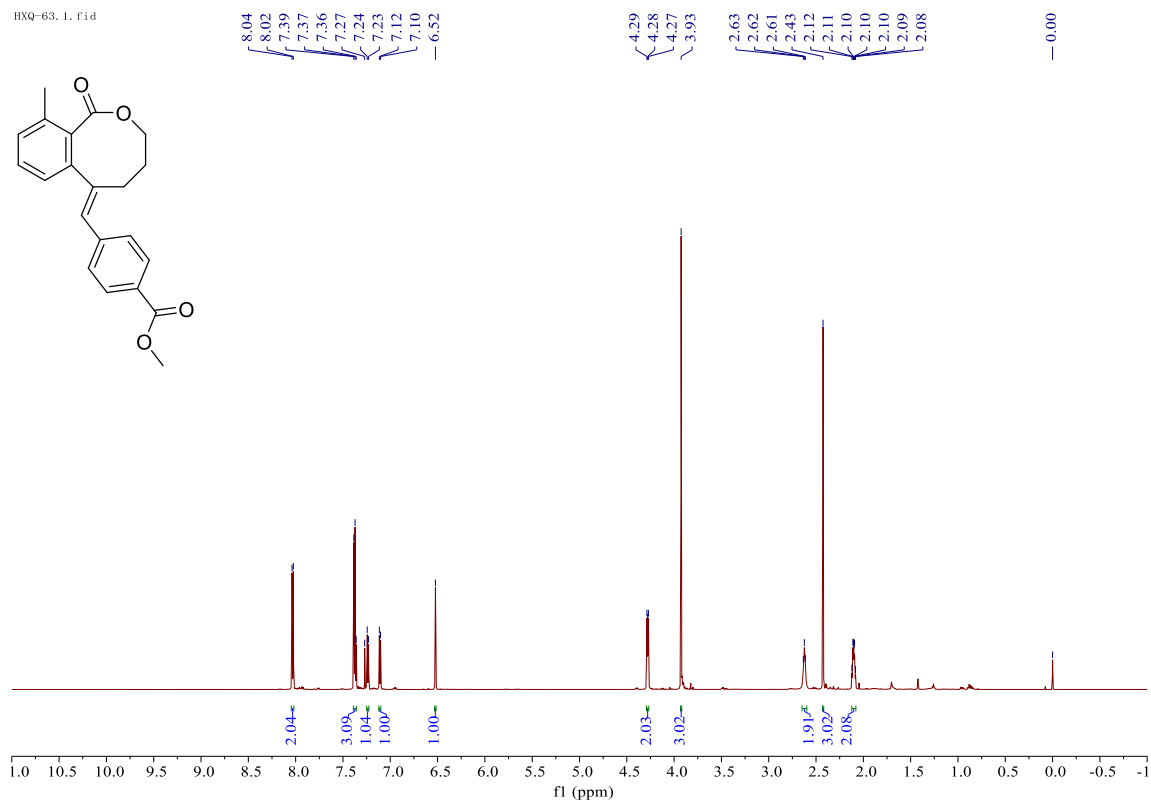

HXQ-63-1.2.fid

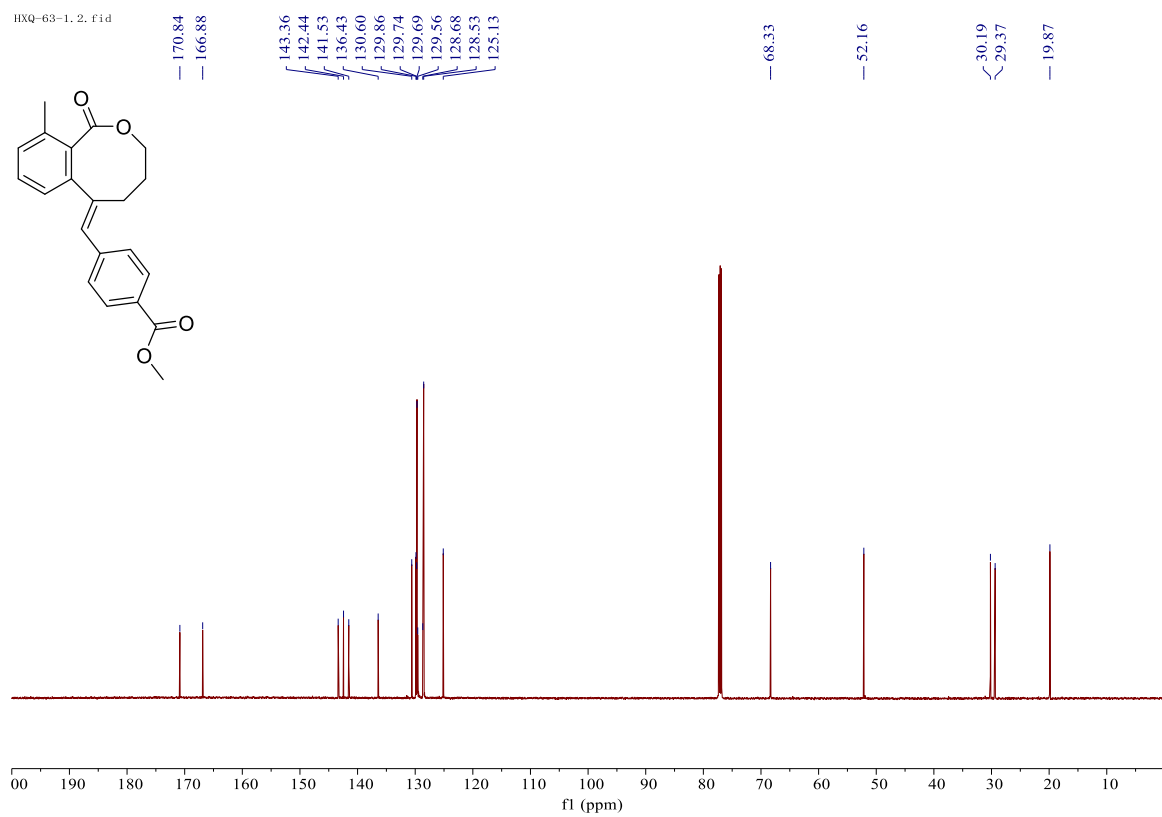

<sup>1</sup>H NMR (400 MHz, CDCl<sub>3</sub>), <sup>13</sup>C NMR (100 MHz, CDCl<sub>3</sub>) and <sup>19</sup>F NMR (376 MHz, CDCl<sub>3</sub>) spectra of product 3ah

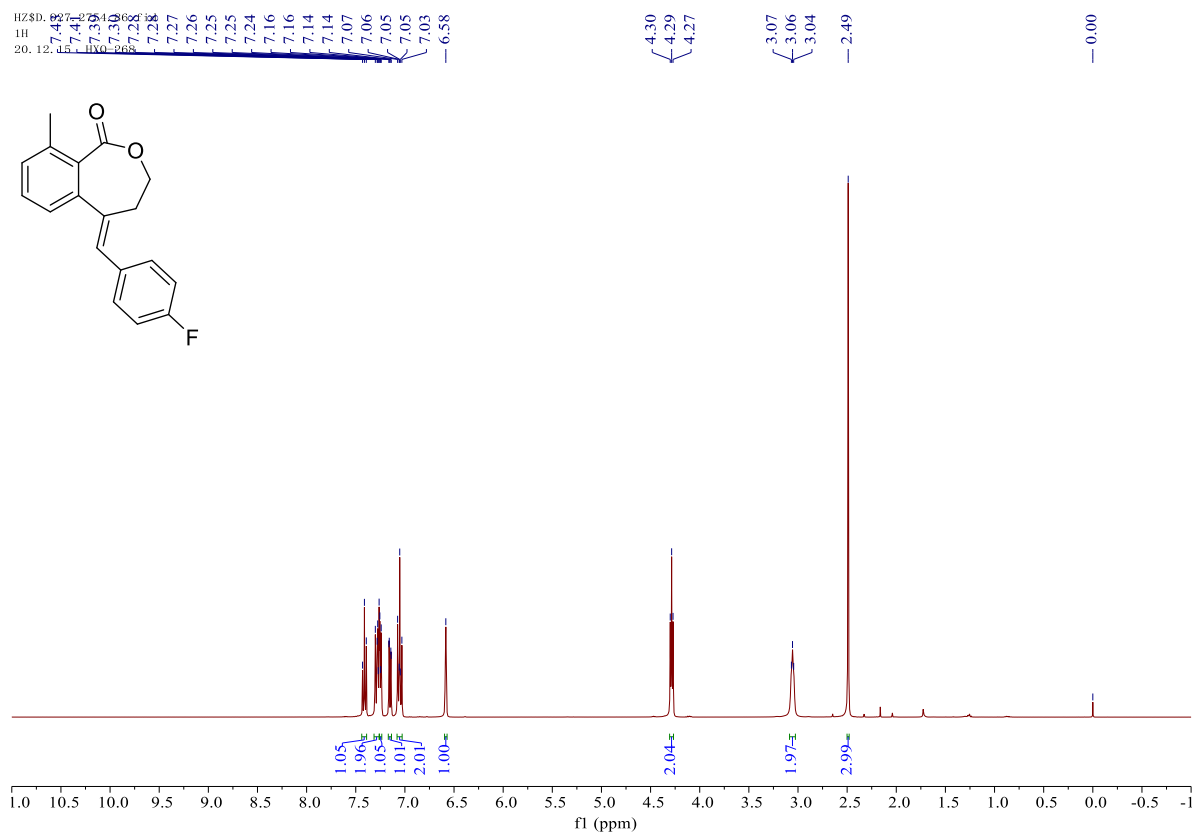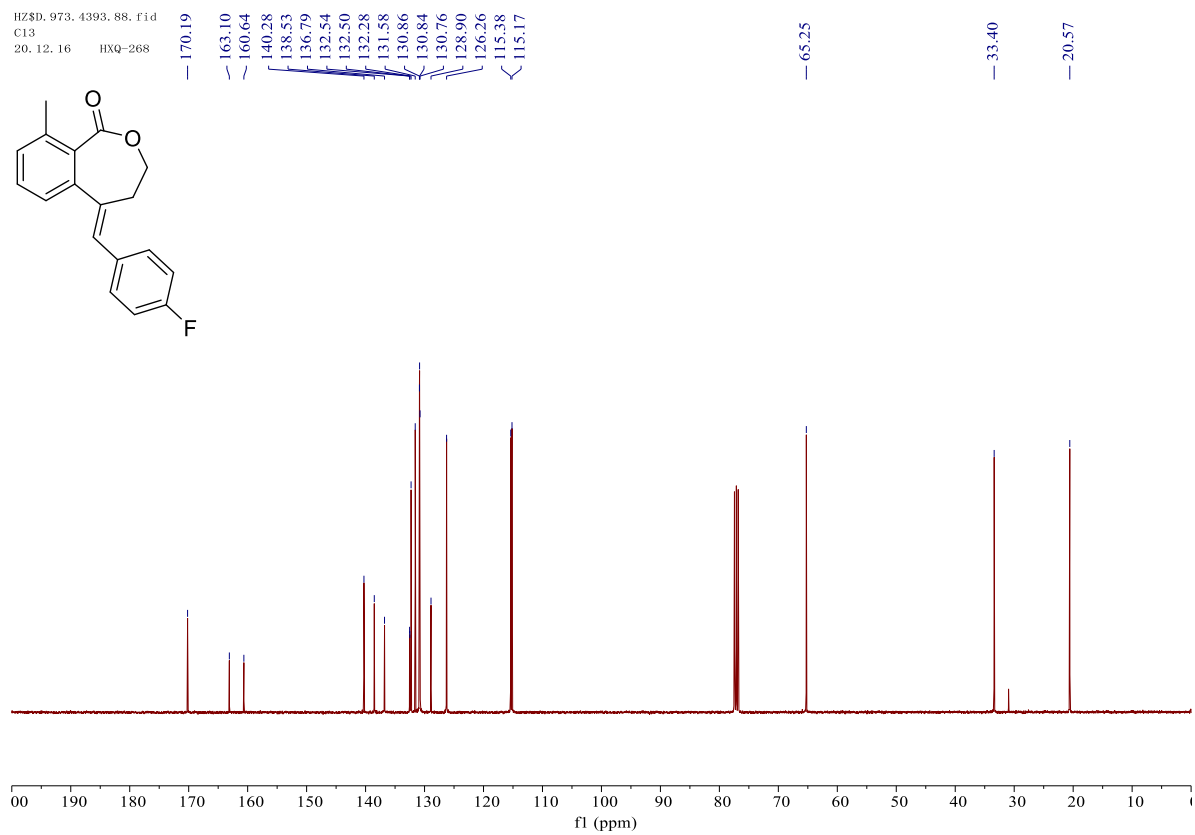

HZSD\_973\_4395\_87.fid  
F19  
20.12.16 HXQ-268

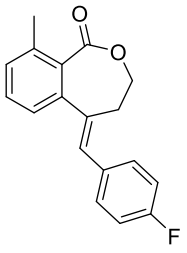

-113.91

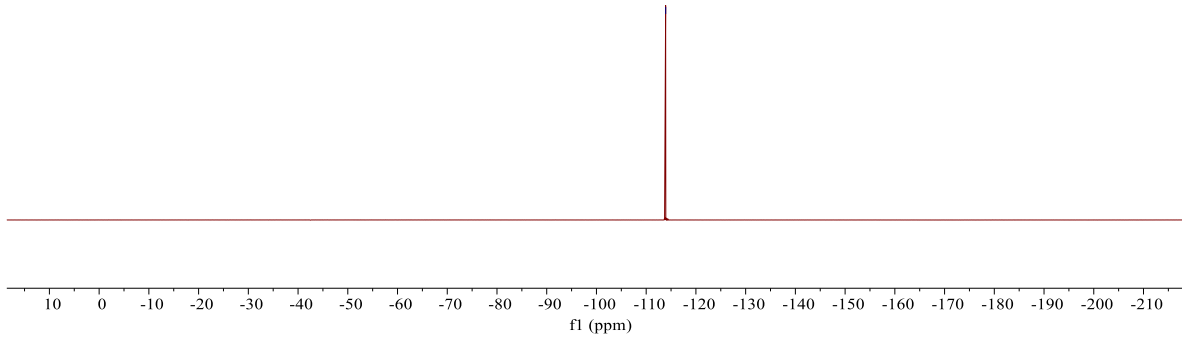

**$^1\text{H}$  NMR (400 MHz,  $\text{CDCl}_3$ ) and  $^{13}\text{C}$  NMR (100 MHz,  $\text{CDCl}_3$ ) spectra of product 3dh**

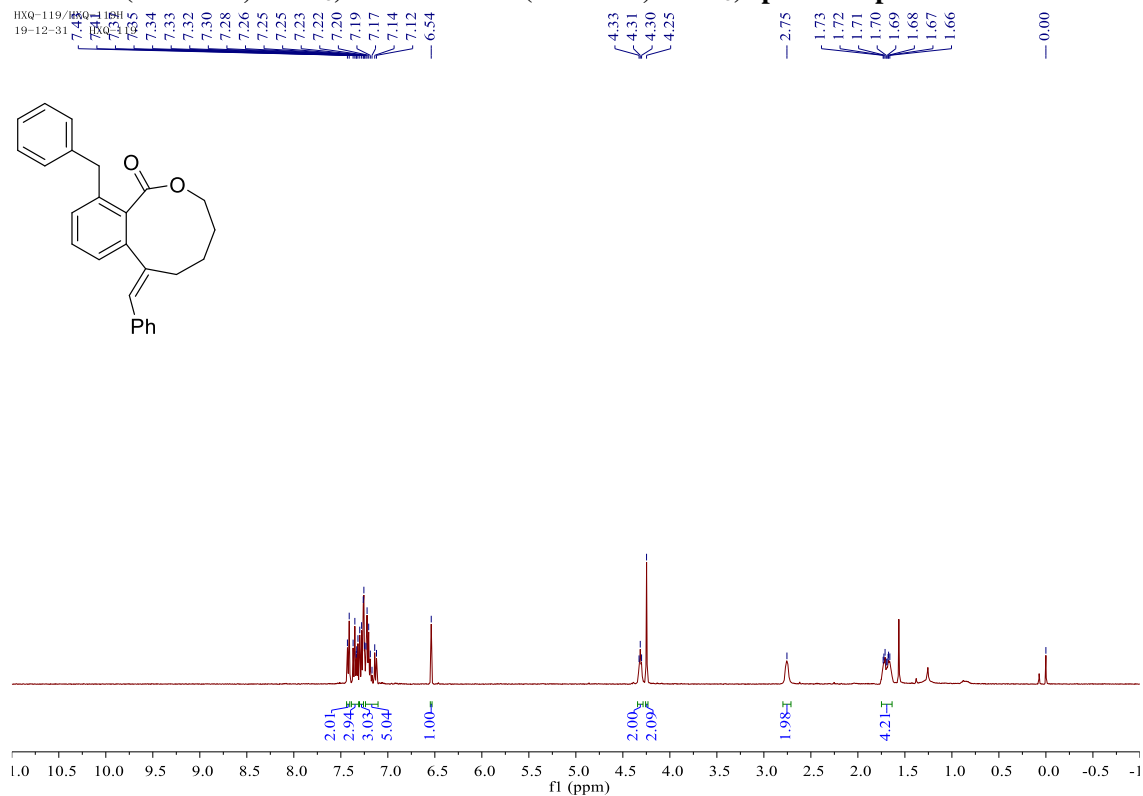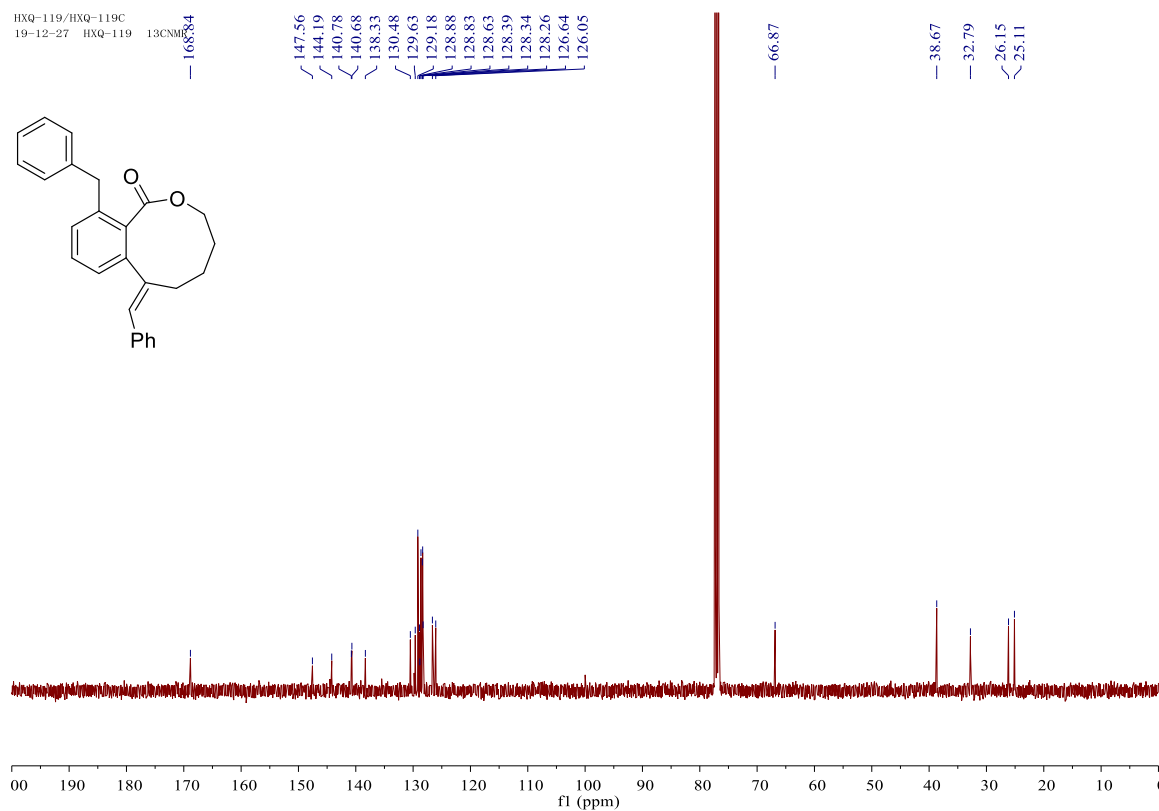

**<sup>1</sup>H NMR (400 MHz, CDCl<sub>3</sub>) and <sup>13</sup>C NMR (100 MHz, CDCl<sub>3</sub>) spectra of product 3di**

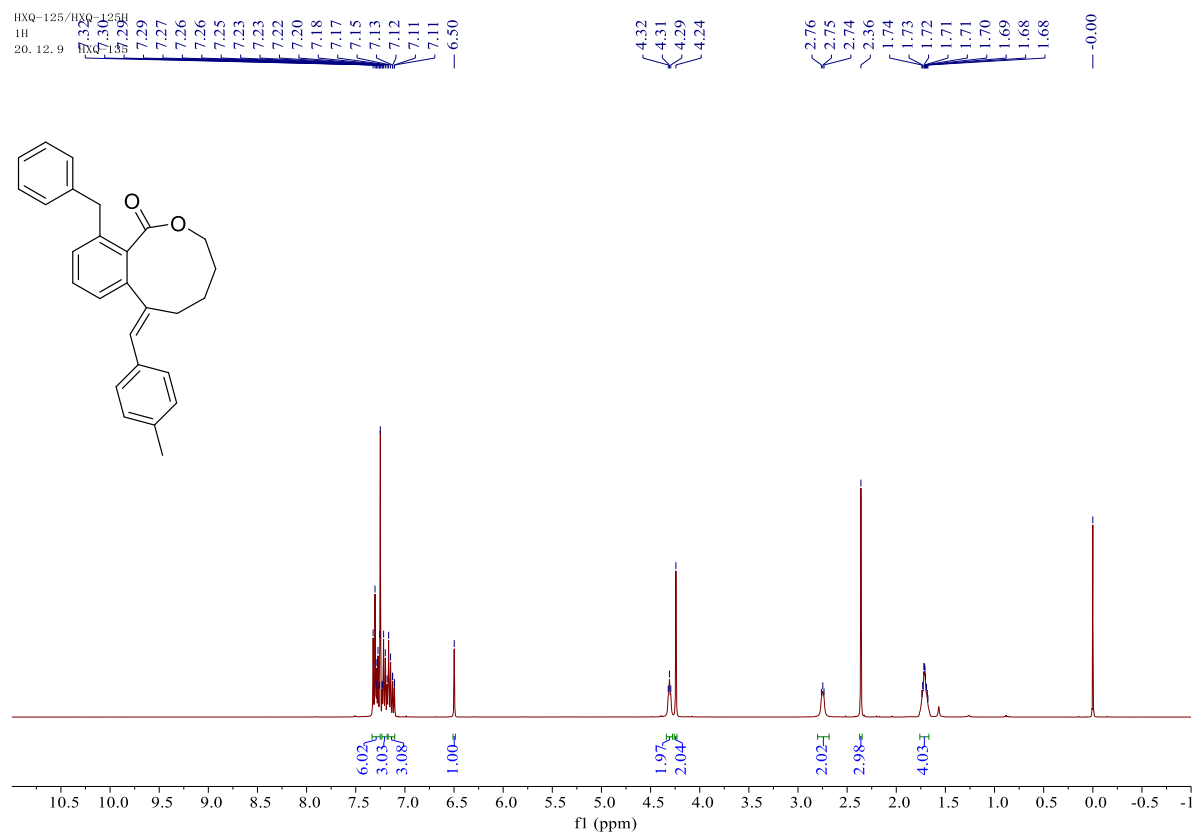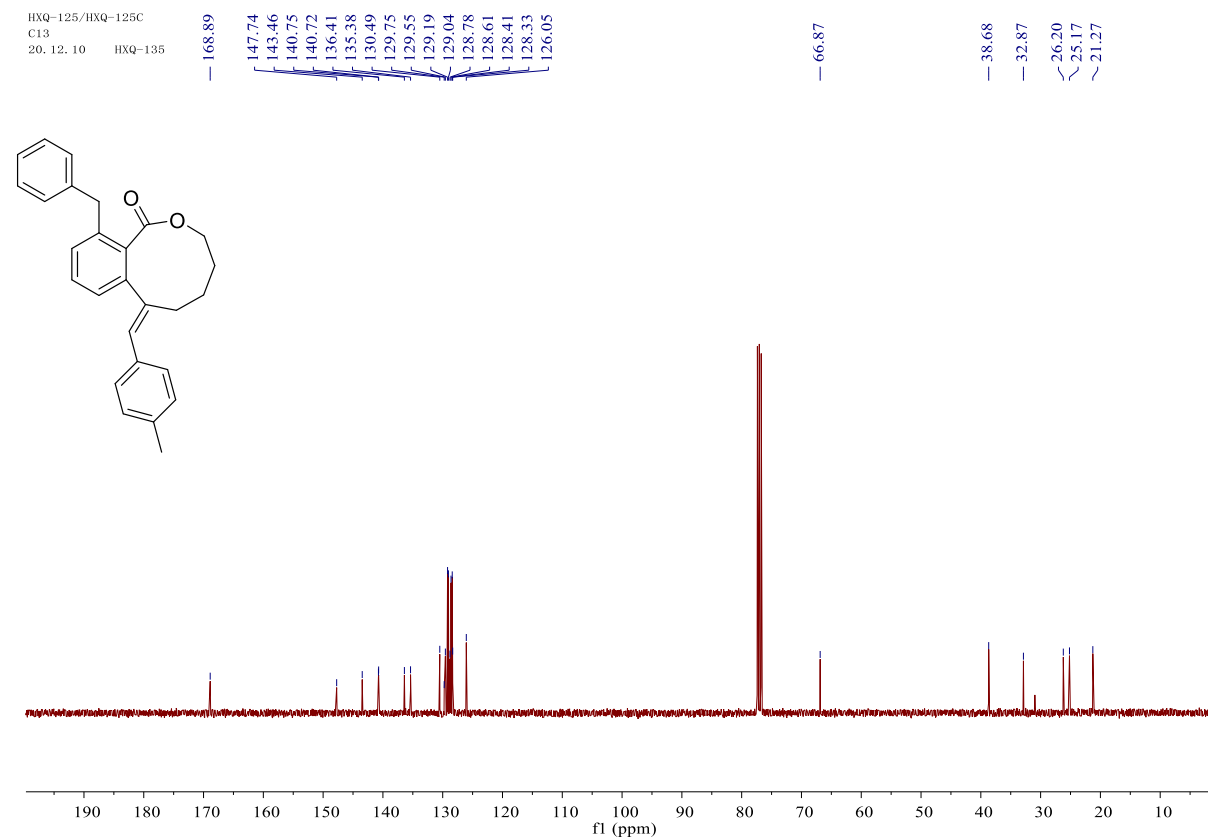

# <sup>1</sup>H NMR (400 MHz, CDCl<sub>3</sub>) and <sup>13</sup>C NMR (101 MHz, CDCl<sub>3</sub>) spectra of product 2f

LZK-07/LZK-07H  
20-1-9 LZK-07

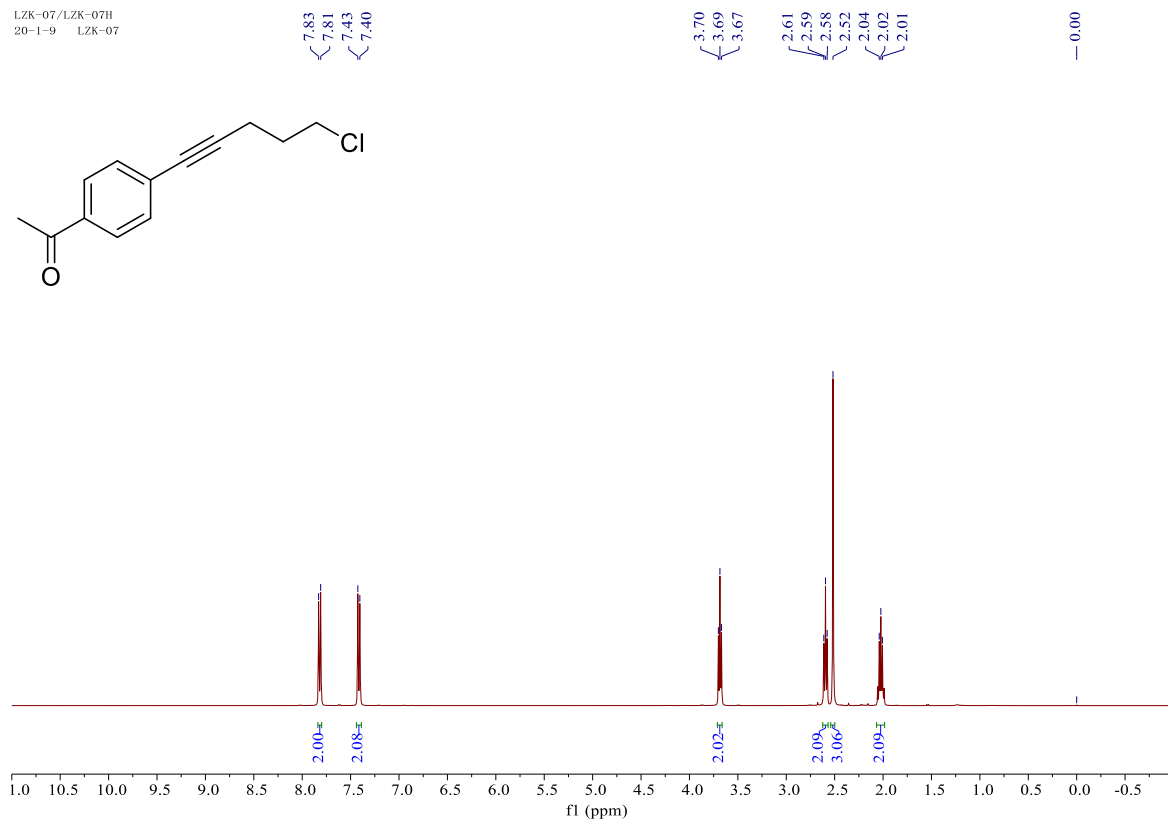

LZK-07/LZK-07C  
20-1-9 LZK-7 <sup>13</sup>CNMR

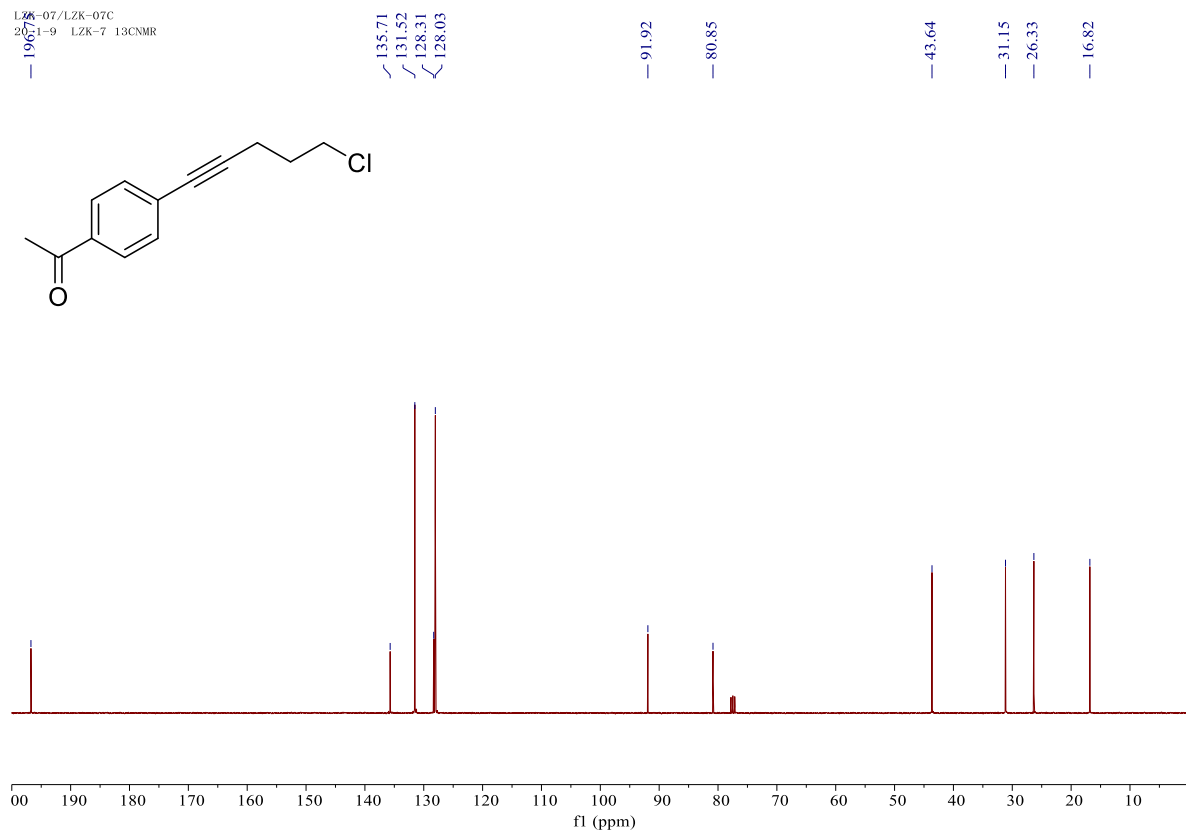

Supplement: d0cc07573f1.pdf [file d0cc07573f1.pdf]
